# Supplementary material for: Screening of salt tolerance of maize (Zea mays L.) lines using membership function value and GGE biplot analysis
Source: PeerJ. 2024 Jan 29;12:e16838. doi: 10.7717/peerj.16838 (PMC10832624; doi:10.7717/peerj.16838)
Supplement: Supplemental Information 1 — ANOVA results; Principal component analysis results; Data for the process of calculating the value of the affiliation function–Germination potential–SOD–Plant hight; Germ length; Chloroplyll SPAD; PRO; Total affiliation function value [file peerj-12-16838-s001.xlsx]

## Sheet: Raw data
Varieties	Treatments	Number	Treatments	Repeat	Plant hight	Stem diameter	Germ length	Radicle length	Leaf area	Chlorophyll SPAD	MDA（nmol/mg)	SOD（U/g)	POD（mU/mg)	PRO（ng/g)	Relative conductivity	Germination rate	Root-crown ratio	Water content	Germination index	Salt tolerance index	Relative salt damage rate	Germination potential
Hongxing 990	CK	A1	B1	1	12.8	23.33	60.28	59.82	59.15	39.53	54.91	48.49	231.69	25.02		80	40.62	69.89	63.7			61.11
Hongxing 990	60mmol/L	A1	B2	1	11.8	21.66	55.48	36.39	63.22	39.1	53.87	47.44	226.28	23.68		54.44	29.73	68.34	48.06	75.44	31.94	45.56
Hongxing 990	120mmol/L	A1	B3	1	11	20.9	48.12	30.42	48.63	28	52.51	45	223.76	24.61		40	33.57	66.52	32.55	51.09	50	30
Hongxing 990	180mmol/L	A1	B4	1	10.6	20.09	34.81	21.95	23.6	41.8	52.18	45.52	231.75	25.35		27.78	26.35	77.04	24.86	39.03	65.28	25.56
Ping'an 1523	CK	A2	B1	1	16.6	26.26	72.84	68	153.77	43.47	53.7	42.73	216.73	23.67		46.67	31.43	60.63	44.12			43.33
Ping'an 1523	60mmol/L	A2	B2	1	17	22.82	61.37	40.36	103.83	47.63	55.97	42.52	233.43	22.43		32.22	37.13	52.43	22.22	50.37	30.95	20
Ping'an 1523	120mmol/L	A2	B3	1	15.3	20.55	48.9	25.72	69.25	44.17	52.6	40.81	230.43	22.42		25.56	30.44	63.64	18.19	41.24	45.24	16.67
Ping'an 1523	180mmol/L	A2	B4	1	10.9	15.97	46.5	13.65	87.03	42.83	52.91	40.74	223.82	23.74		21.11	30.09	64.12	15.19	34.42	54.76	14.44
Huxin 712	CK	A3	B1	1	13.6	22.45	74.01	53.7	28.43	30.9	51.75	39.25	225.44	19.44		55.56	30.35	60.59	38.38			35.56
Huxin 712	60mmol/L	A3	B2	1	15.4	20.04	64.97	46.64	21.18	42.03	49.85	42.54	221.66	19.53		41.11	20.1	65.13	31.57	82.27	26	28.89
Huxin 712	120mmol/L	A3	B3	1	11.6	18.97	64.76	29.08	28.47	29.83	53.62	39.2	220.28	19.89		40	41.57	57.81	26.2	68.28	28	23.33
Huxin 712	180mmol/L	A3	B4	1	8	15.92	48.77	23.96	24.57	40.13	49.86	39.76	217.7	19.87		26.67	40.26	77.88	15.05	39.2	52	13.33
Seedstar 618	CK	A4	B1	1	10.9	26.13	71.32	104.8	81.82	38.93	47.88	41.9	198.24	23.04		50	43.87	70.18	42.55			40
Seedstar 618	60mmol/L	A4	B2	1	10.5	23.14	64.82	48.61	53.2	37.83	47.51	40.25	200.16	21.98		40	38.26	74.81	33.75	79.33	21.74	32.22
Seedstar 618	120mmol/L	A4	B3	1	13	20.13	55.9	27.34	58.11	40.07	48.02	40.49	201.24	23.68		31.11	28.72	77.7	25.51	59.96	39.13	24.44
Seedstar 618	180mmol/L	A4	B4	1	14.2	17.79	53.53	13.62	35.2	38.3	47.2	40.84	210.13	22.27		18.89	23.3	80.02	14.21	33.41	60.87	13.33
Simon 6	CK	A5	B1	1	18.4	23.49	68.84	62.17	37.56	36.77	48.77	49.32	233.97	22.18		80	28.75	65.39	66.16			62.22
Simon 6	60mmol/L	A5	B2	1	21.3	22.77	42.19	40.45	40.95	32.83	50.64	46.93	231.69	22.31		64.44	23.35	71.29	60.83	91.95	16.67	57.78
Simon 6	120mmol/L	A5	B3	1	21.5	19.21	30.12	35.42	29.82	37.17	51.98	48.06	227.66	22.71		54.44	25.93	75.46	52.87	79.92	30.56	51.11
Simon 6	180mmol/L	A5	B4	1	18	18.97	20.55	29.68	23.95	41.07	51.71	45.68	242.97	21.65		51.11	32.17	74.2	33.15	50.1	36.11	30
Hongxing 528	CK	A6	B1	1	12.5	22.19	67.7	60.83	29.44	40.57	53	35.65	203.7	22.04		64.44	34.17	74.42	58.33			61.11
Hongxing 528	60mmol/L	A6	B2	1	12	21.2	43.18	44.14	31.1	45.07	54.23	35.77	211.03	23.44		47.78	40.57	67.2	41.67	71.43	27.12	41.11
Hongxing 528	120mmol/L	A6	B3	1	14.1	17.33	41.46	28.7	32.91	42.3	53.66	36.24	206.29	21.85		42.22	44.83	79.06	33.94	58.17	35.59	32.22
Hongxing 528	180mmol/L	A6	B4	1	12	15.06	34.95	15.6	35.29	46.8	50.97	35.86	206.29	22.02		31.11	34.48	75.21	25.19	43.17	52.54	24.44
Zengyu 157	CK	A7	B1	1	23.8	25.75	89.57	96.21	63.5	35.3	55.53	37.36	254.08	24.28		81.11	30.43	73.77	43.7			35.56
Zengyu 157	60mmol/L	A7	B2	1	20.7	24.04	70.58	45.14	42.01	39.57	55.21	37.13	253	24.57		48.89	37.91	69.65	28.94	66.21	39.73	23.33
Zengyu 157	120mmol/L	A7	B3	1	21.6	22.24	66.31	23.18	40.34	39.73	55.31	39.14	240.93	23.37		40	25.92	71.79	18.52	42.37	50.68	14.44
Zengyu 157	180mmol/L	A7	B4	1	18.3	20.9	54.13	18.88	39.39	37.7	56.27	37.16	240.33	24.42		24.44	40.81	63.31	9.63	22.03	69.86	6.67
Wofeng 188	CK	A8	B1	1	10.7	22.77	38.92	49.04	43.83	43	51.7	45.86	244.02	21.26		82.22	41.11	76.63	55.28			53.33
Wofeng 188	60mmol/L	A8	B2	1	13.3	21.68	35.61	33.37	41.33	39.73	53.8	44.83	251.88	22.72		51.11	34.85	68.34	37.64	68.09	36.99	35.56
Wofeng 188	120mmol/L	A8	B3	1	12.5	19.97	11.75	16.81	34.59	40.37	53.42	44.53	245.39	20.74		42.22	51.26	85.47	26.62	48.16	47.95	23.33
Wofeng 188	180mmol/L	A8	B4	1	7.7	15.46	8.05	10.37	22.91	40.83	51.41	44.91	248.84	20.68		27.78	74.73	83.7	17.04	30.82	63.01	14.44
Yuhe 536	CK	A9	B1	1	15.1	23.14	87.04	76.7	84.91	36.1	57.8	45.52	231.75	23.08		44.44	33.71	57.16	37.69			36.67
Yuhe 536	60mmol/L	A9	B2	1	16.7	19.21	72.29	44.82	49.72	34.13	54.16	42.96	238.24	21.75		32.22	24.94	64.43	23.94	63.51	27.5	22.22
Yuhe 536	120mmol/L	A9	B3	1	14.2	17.31	63.41	38.97	53.94	36.53	57.26	42.22	225.43	22.85		21.11	41.65	62.8	13.66	36.24	52.5	12.22
Yuhe 536	180mmol/L	A9	B4	1	12.2	16.13	34.61	17.34	46.32	38.1	57.13	43.37	225.37	22.92		15.56	38.44	70.33	8.52	22.6	65	7.78
Wofeng No.9	CK	A10	B1	1	13	23.39	86.91	39.62	81.35	43	55.55	42.24	249.44	24.49		64.44	31.34	73.65	51.06			51.11
Wofeng No.9	60mmol/L	A10	B2	1	14.8	22.05	67.81	24.66	52.09	37.67	54.7	40.53	246.4	23.73		54.44	21.96	76.83	43.75	85.68	14.04	43.33
Wofeng No.9	120mmol/L	A10	B3	1	13.8	17.38	36.87	21.95	33.47	39.63	55.01	43.57	258.19	24.22		46.67	39.57	78.16	27.78	54.4	26.32	24.44
Wofeng No.9	180mmol/L	A10	B4	1	9.5	15.32	23.98	16.84	33.38	37.2	56.97	41.91	254.74	24.01		21.11	16.86	81.4	16.67	32.64	64.91	15.56
Nongfu 99	CK	A11	B1	1	15.1	23.79	73.32	60.83	66.73	40.1	56.94	35.03	269.39	20.77		96.67	33.61	85.49	87.18			91.11
Nongfu 99	60mmol/L	A11	B2	1	19.7	21.96	62.48	45.54	62.21	43.33	56.36	35.51	262.42	21.93		94.44	27.54	73.96	76.44	87.68	3.53	80
Nongfu 99	120mmol/L	A11	B3	1	15.7	19.23	51.46	27.22	81.33	28.73	57.64	37.6	271.53	21.49		87.78	25.21	83.78	66.48	76.26	7.06	67.78
Nongfu 99	180mmol/L	A11	B4	1	11.6	18.33	37.44	16.41	52.82	45.9	54.01	38.23	255.21	21.69		83.33	32.59	81.85	56.9	65.27	14.12	55.56
Xuanhe 8	CK	A12	B1	1	14.7	23.79	73.22	28.77	51.07	38.47	44.36	36.21	234.72	25.97		92.22	26.22	80.94	74.81			76.67
Xuanhe 8	60mmol/L	A12	B2	1	18.8	22.4	60.21	11.92	52.52	39.73	48.75	36.3	237.76	24.47		91.11	23.44	79.89	70.93	94.8	1.2	73.33
Xuanhe 8	120mmol/L	A12	B3	1	19	18.12	57.97	10.56	71.57	40.83	47.52	38.35	228.35	25.46		87.78	25.51	73.33	67.92	90.78	4.82	71.11
Xuanhe 8	180mmol/L	A12	B4	1	12.7	15.5	31.62	7.06	42.92	49.73	45.11	36.56	225.43	24.76		83.33	38.25	78.79	62.5	83.54	9.64	64.44
Simon 668	CK	A13	B1	1	20.9	21.84	34.04	42.75	89.33	44.2	57.37	34.86	241.57	19.45		91.11	27.08	76.48	66.57			63.33
Simon 668	60mmol/L	A13	B2	1	16.5	20.09	30.15	32.74	73.05	37.03	54.21	36.28	237.46	19.62		78.89	24.15	77.8	59.4	89.22	13.41	58.89
Simon 668	120mmol/L	A13	B3	1	15.6	18.77	28.87	16.29	33.52	39.8	57.46	36.62	234.84	20.13		62.22	26.83	75.6	48.06	72.18	31.71	44.44
Simon 668	180mmol/L	A13	B4	1	8.8	18.05	23.02	4.28	42.23	37.97	55.5	37.12	249.62	20.91		55.56	24.72	74.56	33.56	50.42	39.02	28.89
Linyu 1339	CK	A14	B1	1	18.2	20.99	78.23	73.65	74.14	40.8	58.77	36.61	225.73	20.45		71.11	37.6	70.06	50.6			46.67
Linyu 1339	60mmol/L	A14	B2	1	15.7	19.83	52.62	38	62.18	36.23	54.49	36.18	222.51	20.89		63.33	29.49	71.8	44.03	87.01	10.94	42.22
Linyu 1339	120mmol/L	A14	B3	1	15.3	19.18	49.8	22.91	28.56	37.5	55.17	37.73	240.03	20.89		51.11	37.1	72.37	28.94	57.18	28.13	23.33
Linyu 1339	180mmol/L	A14	B4	1	11	18.12	36.13	7.31	49.17	34.07	57.52	39.65	220.49	20.39		32.22	38.99	75.39	19.31	38.15	54.69	15.56
Yuanyuan 1	CK	A15	B1	1	17	24.53	77.53	77.59	62.95	38.97	52.85	45.06	201.11	20.33		96.67	30.24	68.53	70			71.11
Yuanyuan 1	60mmol/L	A15	B2	1	15.1	22.93	41.33	47.66	56.69	39.73	53.84	42.25	212.76	20.87		91.11	23.11	74.82	63.38	90.54	4.71	67.78
Yuanyuan 1	120mmol/L	A15	B3	1	13.8	21.87	40.2	29.57	35.07	44.7	49.97	44.18	221.53	20.9		58.89	20.87	79.41	43.19	61.71	37.65	38.89
Yuanyuan 1	180mmol/L	A15	B4	1	12.2	20.85	36.7	12.75	40.02	39.63	50.11	44.82	206.47	22.4		47.78	31.07	81.31	30.83	44.05	49.41	28.89
Qunze 888	CK	A16	B1	1	17.6	22.47	82.19	75.7	98.89	36.1	46.58	44.41	235.15	25.43		44.44	48.64	76.97	35.69			34.44
Qunze 888	60mmol/L	A16	B2	1	17.7	21.17	73.69	42.83	63.92	40.47	49.19	41.75	229.03	23.76		35.56	44.51	70.53	26.44	74.06	20	26.67
Qunze 888	120mmol/L	A16	B3	1	13.3	20.34	45.58	25.7	46.34	39.4	46.74	42.91	240.74	25.1		32.22	37.18	74.9	21.53	60.31	27.5	21.11
Qunze 888	180mmol/L	A16	B4	1	15	19.53	36.97	13.24	60.36	39.83	49.77	44.48	228.4	24.53		22.22	45.79	76.08	15.83	44.36	50	16.67
Shanning 23	CK	A17	B1	1	20.5	26.33	87.13	80.93	62.04	44.07	49.12	40.4	200.41	18.49		23.33	38.52	73.25	18.7			18.89
Shanning 23	60mmol/L	A17	B2	1	20.8	21.98	70.44	71.74	46.06	40.07	47.14	38.88	214.84	18.69		16.67	41.71	75.9	12.96	69.31	30.43	12.22
Shanning 23	120mmol/L	A17	B3	1	17.3	20.8	69.22	57.26	31.58	38.4	51.9	41.31	211.78	19.34		15.56	39.56	62.23	10.56	56.44	39.13	11.11
Shanning 23	180mmol/L	A17	B4	1	9.4	19.07	55.39	32.37	33.49	30.53	50.08	39.79	218.65	21.15		10	43.79	87.76	5.6	29.95	56.52	5.56
Youqi 909	CK	A18	B1	1	10.1	24.55	73.69	48.58	19.43	41.23	57.9	43.32	199.72	26.43		88.89	21.81	69.22	64.68			64.44
Youqi 909	60mmol/L	A18	B2	1	13	21.68	52.43	37.69	20.85	44.77	54.26	44.1	209.76	25.58		67.78	30.37	71.35	45.56	70.44	23.75	43.33
Youqi 909	120mmol/L	A18	B3	1	10.2	16.43	49.33	25.82	36.81	42.8	56.44	41.66	221.53	24.17		51.11	43.91	69.94	38.1	58.91	42.5	42.22
Youqi 909	180mmol/L	A18	B4	1	10.1	15.39	26.12	11.72	15.3	40.87	58.11	42.05	199.78	24.12		31.11	44.72	78.1	26.81	41.45	62.5	26.67
Jin'ai 588	CK	A19	B1	1	13.6	20.11	90.53	100.65	53.35	38.6	46.06	45.35	253.15	22.94		87.78	19.6	76.36	64.03			73.33
Jin'ai 588	60mmol/L	A19	B2	1	13.5	17.89	43.14	53.73	40.53	38.87	45.72	43.91	239.76	23.48		78.89	23.44	74.15	53.1	82.94	10.13	56.67
Jin'ai 588	120mmol/L	A19	B3	1	10.4	16.27	38.87	23.88	30.76	37.47	49.96	43.9	242.88	21.92		66.67	52.47	86.6	48.61	75.92	24.05	54.44
Jin'ai 588	180mmol/L	A19	B4	1	8.1	15.27	29.32	10.62	30.08	38.03	48.1	42.8	245.65	21.63		53.33	41.1	78.61	29.77	46.49	37.97	32.22
Ganxin 2818	CK	A20	B1	1	15.7	21.94	40.34	60.72	47.3	36.6	51.67	39.77	217.03	22.16		43.33	26.11	87.61	34.81			36.67
Ganxin 2818	60mmol/L	A20	B2	1	16.9	19.92	35.97	20.21	53.2	35.73	49.31	39.65	223.2	23.15		16.67	28.98	76.62	12.96	37.23	46.15	11.11
Ganxin 2818	120mmol/L	A20	B3	1	17.9	18.03	29.18	12.88	70.19	37.67	54.29	40.07	227.59	21.5		12.22	31.57	75.34	10.46	30.05	66.67	10
Ganxin 2818	180mmol/L	A20	B4	1	13.2	17.7	28.21	8.07	52.81	39.03	53.47	38.18	215.99	23.41		11.11	30.77	84.37	7.5	21.54	74.36	8.89
Wugu 568	CK	A21	B1	1	11	23	84.02	87.9	31.42	40	51.01	43.45	255.23	23.4		78.89	28.59	85.21	63.19			73.33
Wugu 568	60mmol/L	A21	B2	1	12.6	20.22	72.7	33.98	35.6	45.53	49.75	42.92	258.57	22.34		71.11	39.76	79.78	47.92	75.82	11.11	67.78
Wugu 568	120mmol/L	A21	B3	1	13.1	19.21	71.04	17.05	31.15	47	53.42	40.23	245.07	23.28		64.44	24.26	78.94	39.49	62.49	19.44	56.67
Wugu 568	180mmol/L	A21	B4	1	13.7	17.42	60.79	10.56	31.12	36.37	50.26	40.13	238.26	22.45		33.33	21.86	81	21.44	33.92	58.33	27.78
Zheng Shan 958	CK	A22	B1	1	19.5	25.57	75.94	22.73	26.65	42.77	56.69	35.29	229.96	24.63		93.33	17.42	72.66	67.08			68.89
Zheng Shan 958	60mmol/L	A22	B2	1	16.5	22.52	61.47	21.12	36.87	42.17	54.19	36.48	242.84	25.33		86.67	32.28	68.19	57.5	85.71	7.14	54.44
Zheng Shan 958	120mmol/L	A22	B3	1	15.4	18.05	47.38	10.66	37.47	39.03	56.79	35.34	238.15	23.02		80	18.96	74.33	47.55	70.88	13.1	43.33
Zheng Shan 958	180mmol/L	A22	B4	1	14.6	17.24	30.65	7.37	25.14	39.53	52.94	36.12	239.38	25.05		76.67	15.69	75.45	37.08	55.28	17.86	33.33
HengYu369	CK	A23	B1	1	13.4	23.05	90.86	131.92	74.87	38.93	49.6	33.42	252.55	20.83		97.78	31.76	77.46	92.27			95.56
HengYu369	60mmol/L	A23	B2	1	11.2	20.11	47.35	23.5	64.35	40.23	52.36	36.36	238.27	21.7		91.11	24.95	79.11	86.81	94.08	5.75	88.89
HengYu369	120mmol/L	A23	B3	1	10.8	19.35	41.78	17.2	51.92	35.93	51.3	33.6	241.67	20.42		90	29.07	81.23	82.87	89.81	6.9	86.67
HengYu369	180mmol/L	A23	B4	1	7	14.81	31.35	13.62	51.47	39.73	51.28	36.1	251.73	21.16		88.89	29.93	81.26	79.12	85.75	8.05	83.33
Xianghe 9918	CK	A24	B1	1	9.4	20.78	77.21	43.37	58.57	40.07	55.14	43.22	213.86	22.54		96.67	34.1	73.47	83.98			78.89
Xianghe 9918	60mmol/L	A24	B2	1	13	18.21	44.61	39.03	70.3	37.6	52.98	42.61	220.01	23.94		95.56	45.68	82.77	79.81	95.04	2.33	76.67
Xianghe 9918	120mmol/L	A24	B3	1	11.3	16.8	33.22	18.68	40.29	35.9	55.51	40.17	215.44	22.94		94.44	33.4	75.92	76.81	91.46	4.65	74.44
Xianghe 9918	180mmol/L	A24	B4	1	10.8	14.95	30.61	9.6	31.91	33.33	54.88	39.82	213.69	24.1		92.22	43.52	73.37	71.11	84.67	8.14	67.78
Xingnong No.1	CK	A25	B1	1	18	20.83	65.33	71.97	44.19	40.7	54.4	36.29	247.28	23.02		75.56	27.98	72.97	64.58			61.11
Xingnong No.1	60mmol/L	A25	B2	1	18.5	18.49	49.64	30.35	59.16	40.73	51.74	36.98	249.8	22.89		60	22.76	69.21	43.15	66.81	20.59	40
Xingnong No.1	120mmol/L	A25	B3	1	17.7	17.26	46.18	28.49	46.18	42.07	53.23	35.18	251.44	23.65		52.22	24	69.19	35.65	55.2	30.88	34.44
Xingnong No.1	180mmol/L	A25	B4	1	16.9	16.15	38.98	22.12	50.35	42.43	55.44	37.85	235.81	22.38		41.11	37.31	77.32	22.78	35.27	44.12	17.78
Bixiang 809	CK	A26	B1	1	12.7	22.86	67.98	79.71	32.7	38.07	47.69	41.75	263.73	24.91		81.11	38.58	67.46	47.45			38.89
Bixiang 809	60mmol/L	A26	B2	1	12.5	20.73	59.74	44.7	25.16	41.3	46.86	40.47	267.19	25.04		54.44	32.42	68.85	36.76	77.46	32.88	36.67
Bixiang 809	120mmol/L	A26	B3	1	12.9	17.79	55.07	44.2	29.04	34.93	46.78	38.78	263.85	24.41		42.22	32.23	69.91	29.31	61.76	47.95	34.44
Bixiang 809	180mmol/L	A26	B4	1	7.9	16.73	40.05	24.47	27.37	33.57	47	41.64	266.54	23.15		36.67	38.7	70.09	20.32	42.83	54.79	18.89
Jinfengjie 607	CK	A27	B1	1	14.4	22.89	72.83	82.31	65.53	33.17	45.39	41.13	241.67	21.39		87.78	25.91	83.86	70.14			70
Jinfengjie 607	60mmol/L	A27	B2	1	13.2	19.74	47.9	50.71	55.93	38.83	46.78	41.77	236.52	21.17		82.22	60.5	78.93	61.06	87.06	7.5	64.44
Jinfengjie 607	120mmol/L	A27	B3	1	11.6	16.92	41.16	20.3	34.59	42.77	46.79	39.6	245.24	20.89		72.22	32.78	83.28	54.17	77.23	18.75	61.11
Jinfengjie 607	180mmol/L	A27	B4	1	8.5	15.76	38.86	17.11	38.18	41.9	49.49	41.92	233.35	20.6		62.22	60.08	78.37	45.19	64.42	30	47.78
Jinongyu 309	CK	A28	B1	1	11.3	22.95	81.43	89.32	33.26	35.8	51.2	43.01	221.3	25.92		87.78	37.2	75.66	64.81			65.56
Jinongyu 309	60mmol/L	A28	B2	1	12.6	21.94	54.85	46.43	39.51	39.03	51.37	42.14	233.65	23.95		82.22	28.43	78.3	60.28	93	6.33	63.33
Jinongyu 309	120mmol/L	A28	B3	1	15.1	19.95	45.5	42.86	22.58	36.9	53.66	42.27	226.21	24.08		75.56	27.69	78.09	53.84	83.07	13.92	56.67
Jinongyu 309	180mmol/L	A28	B4	1	10.1	16.82	29.38	32.54	12.87	30.6	53.19	41.44	236.57	24.41		50	70.83	81.33	41.02	63.29	43.04	41.11
Xinyu 81	CK	A29	B1	1	12.1	23.73	65.49	56.26	36.68	33.63	54.51	32.78	224.55	27.33		88.89	80.18	78.63	67.59			67.78
Xinyu 81	60mmol/L	A29	B2	1	15.1	22.75	53.94	21.65	54.83	38.47	53.74	33.51	220.45	25.06		86.67	30.49	83.65	60.93	90.14	3.75	66.67
Xinyu 81	120mmol/L	A29	B3	1	13.7	16.02	41.99	20.98	39.88	40.47	54.96	32.88	222.09	26.61		75.56	17.56	86.25	44.49	65.82	13.75	53.33
Xinyu 81	180mmol/L	A29	B4	1	16.9	15.23	36.26	12.72	45.99	39.83	53.65	32.83	241.24	26.54		72.22	22.59	79.39	41.99	62.12	16.25	48.89
Xinyu 24	CK	A30	B1	1	22.1	24.27	74.52	27.48	42.15	45.7	50.82	38.08	273.04	20.75		72.22	28.8	69.94	56.06			54.44
Xinyu 24	60mmol/L	A30	B2	1	17.8	22.4	53.32	25.73	48.62	43.27	49.49	39.3	255.88	22.39		70	27.19	67.47	50.88	90.75	4.55	42.22
Xinyu 24	120mmol/L	A30	B3	1	16.4	20.85	46.33	21.91	63.95	37.2	54.07	38.29	269.18	22.99		65.56	18.43	65.68	44.81	79.93	10.61	46.67
Xinyu 24	180mmol/L	A30	B4	1	12.4	20.02	35.59	14.65	34.27	41.43	53.24	36.64	269.76	21.42		58.89	27.21	71.35	33.15	59.12	19.7	33.33
Denghai 3672	CK	A31	B1	1	18.4	24.57	77.03	32.77	50.07	33.37	52.89	35.62	248.97	20.11		80	23.47	82.07	61.11			67.78
Denghai 3672	60mmol/L	A31	B2	1	16	22.52	65.42	21.55	33.19	38.43	51.14	35.88	237.38	21.11		68.89	35.52	78.73	46.57	76.21	13.89	51.11
Denghai 3672	120mmol/L	A31	B3	1	14.9	20.69	57.49	15.42	22.88	45.1	54.37	35.64	241.54	22.06		67.78	33.67	85.49	36.06	59.02	15.28	38.89
Denghai 3672	180mmol/L	A31	B4	1	15.3	18.4	35.06	12.3	26.61	42.97	51.39	34.7	247.04	20.33		43.33	19.95	81.24	24.95	40.83	45.83	28.89
Xinyu 66	CK	A32	B1	1	17.5	19.99	68.69	53.97	97.29	38.23	49.42	42.51	258.05	21.89		96.67	27.82	75.1	90.93			93.33
Xinyu 66	60mmol/L	A32	B2	1	15.8	18.95	55.86	24.21	160.2	41.9	48.78	41.6	259.28	22.09		91.11	21.72	77.73	74.91	82.38	5.75	72.22
Xinyu 66	120mmol/L	A32	B3	1	19.7	18.03	45.39	18.78	104.09	43.7	49.44	41.8	263.56	21.16		83.33	17.8	77.18	64.21	70.62	13.79	73.33
Xinyu 66	180mmol/L	A32	B4	1	12.6	17.24	35.01	13.52	111.73	40.5	49.47	42.45	246.75	23.63		81.11	18.49	81.37	61.06	67.16	16.09	71.11
Xinnong 008	CK	A33	B1	1	15.9	24.53	79.41	77.29	113.67	46.57	46.36	37.8	242.42	26.19		81.11	29.98	66.36	58.29			63.33
Xinnong 008	60mmol/L	A33	B2	1	18	22.58	36.35	48.57	104.73	42.37	50.45	37.18	240.78	25.15		80	45.43	68.74	53.84	92.37	5.48	57.78
Xinnong 008	120mmol/L	A33	B3	1	16.6	21.68	29.45	25.03	102.77	40.1	48.27	37.22	252.49	24.39		58.89	41.25	66.79	45.88	78.71	27.4	51.11
Xinnong 008	180mmol/L	A33	B4	1	13.1	20.85	28.38	17.91	109.99	40.8	46.83	36.37	243.65	25.22		32.22	43.31	76.65	25.69	44.08	60.27	27.78
Xianyu 335	CK	A34	B1	1	16.5	19.67	90.79	57.57	30.65	36.7	59.92	33.88	214.83	23.09		98.89	19.93	77.9	96.11			96.67
Xianyu 335	60mmol/L	A34	B2	1	13.9	18.88	36.85	40	25.24	39.4	55.2	35.82	234.27	23.77		97.78	35.79	79.41	91.81	95.52	4.49	95.56
Xianyu 335	120mmol/L	A34	B3	1	11.7	16.5	27.26	30.35	19.45	34.7	57.7	35.74	217.29	22.68		95.56	39.66	78.73	86.85	90.37	6.74	90
Xianyu 335	180mmol/L	A34	B4	1	8.8	15.2	24.38	17.46	22.22	37.5	56.72	33.73	223.91	21.67		92.22	36.72	85.86	76.81	79.91	15.73	74.44
Fengtian14	CK	A35	B1	1	11.3	23.14	92.2	99.74	31.12	40.5	52.19	33.64	264.67	19.67		36.67	34.39	78.6	26.44			22.22
Fengtian14	60mmol/L	A35	B2	1	9.7	20.39	41.49	23.23	31.04	36.8	50.3	32.96	245.11	22.27		26.67	47.49	80.02	20.42	77.23	27.27	17.78
Fengtian14	120mmol/L	A35	B3	1	9.7	17.36	38.38	19.67	31.02	33.2	55.02	34.8	255.65	20.89		18.89	40.41	63.8	12.13	45.88	48.48	10
Fengtian14	180mmol/L	A35	B4	1	9.2	15.67	24.93	18.65	17.89	38.1	51.43	33.96	267.19	21.19		16.67	28.38	78.76	9.44	35.73	54.55	7.78
Fuyu 109	CK	A36	B1	1	18.3	18.58	60.97	58.78	49.13	41.23	44.67	45.68	205.97	20.43		50	31.66	65.64	44.49			42.22
Fuyu 109	60mmol/L	A36	B2	1	21.9	17.33	42.57	40.85	64.09	43.63	46.8	44.94	222.91	22.14		47.78	37.97	80.68	37.96	85.33	8.89	35.56
Fuyu 109	120mmol/L	A36	B3	1	17.5	15.34	37.1	32.03	61.39	36.63	44.48	45.24	208.39	20.26		46.67	21.72	78.7	36.53	82.1	11.11	34.44
Fuyu 109	180mmol/L	A36	B4	1	13.9	14.65	24.18	20.82	59.42	40.1	47.33	45.27	216	21.18		40	23.98	78.99	29.77	66.91	20	27.78
Simon 3358	CK	A37	B1	1	10.9	22.61	62.82	48.68	37.59	35.53	58.37	36.5	271.66	23.97		76.67	21.42	91.83	63.1			56.67
Simon 3358	60mmol/L	A37	B2	1	9.7	21.68	51.53	39.83	27.95	38.7	58.44	39.45	259.96	24.76		75.56	27.02	74.66	60.37	95.67	1.45	54.44
Simon 3358	120mmol/L	A37	B3	1	8.7	19.37	36.32	24.31	27.44	39.83	57.42	36.99	253.28	24.16		37.78	33.68	80.09	32.59	51.65	50.72	31.11
Simon 3358	180mmol/L	A37	B4	1	11.2	16.73	30.86	17.19	26.18	42.43	58.55	39.34	255.53	22.59		21.11	34.47	81.12	14.54	23.04	72.46	13.33
Jixing218	CK	A38	B1	1	16.9	22.49	82.37	63.5	50.56	27.47	55.72	44.39	238.41	19.67		28.89	28.59	73.41	22.08			21.11
Jixing218	60mmol/L	A38	B2	1	17.9	20.8	55.62	37.34	47.24	32.13	53.49	41.05	250.4	20.72		16.67	27.25	77.17	12.69	57.44	42.31	12.22
Jixing218	120mmol/L	A38	B3	1	13	19.55	35.07	18.84	42.3	31.97	56.15	41.41	238.36	21.36		10	24.2	77.83	8.01	36.27	57.69	7.78
Jixing218	180mmol/L	A38	B4	1	13	18.1	23.99	17.97	56.1	31.23	56.15	41.96	243.25	21.7		8.89	33.21	79.31	5.74	26	69.23	5.56
Sanmeng 9599	CK	A39	B1	1	9.7	23.3	73.41	78.93	26.14	37.57	48.58	44.7	228.04	27.38		87.78	39.12	79.1	70.97			62.22
Sanmeng 9599	60mmol/L	A39	B2	1	12.1	21.66	41.59	20.56	46.95	40.27	52.13	43.04	224.07	25.49		71.11	45.01	77.73	60.93	85.84	20	56.67
Sanmeng 9599	120mmol/L	A39	B3	1	13.2	19.48	25.36	8.17	22.69	45.17	50.51	42.66	236.28	26.25		56.67	21.88	80	45.42	63.99	36.25	41.11
Sanmeng 9599	180mmol/L	A39	B4	1	8.6	15.27	23.62	6.97	30.34	39.87	52.04	44.07	237.26	25.62		33.33	47.34	84.02	25.6	36.07	62.5	23.33
Simon 208	CK	A40	B1	1	15.4	21.36	62.21	78.8	68.47	39.67	47.23	34.09	219.92	26.99		85.56	31.46	73.46	67.36			78.89
Simon 208	60mmol/L	A40	B2	1	18.4	18.28	53.46	51.99	29.66	41.17	49.69	37.03	222.05	25.78		73.33	42.83	81.25	54.63	81.1	14.29	63.33
Simon 208	120mmol/L	A40	B3	1	11.3	14.9	41.77	19.79	43.8	41.9	49.23	35.07	224.87	25.28		71.11	42.99	85.86	43.15	64.05	16.88	53.33
Simon 208	180mmol/L	A40	B4	1	9.1	13.7	38.23	18.01	23.76	31.8	46.41	37.68	232.02	26.19		68.89	32.76	85.48	33.19	49.28	19.48	36.67
Huxin 338	CK	A41	B1	1	14.4	22.91	77.37	50.63	23.19	41.77	57.39	35.05	248.55	19.72		88.89	31.62	70.55	72.13			68.89
Huxin 338	60mmol/L	A41	B2	1	17.5	19.62	61.69	17.98	33.7	35.2	53.96	37.85	241.64	19.79		84.44	24	86.33	61.16	84.79	5	60
Huxin 338	120mmol/L	A41	B3	1	16.4	18.79	35.22	4.47	24.29	42.97	55.49	34.94	254.2	21.77		72.22	39.57	82.24	42.08	58.34	18.75	37.78
Huxin 338	180mmol/L	A41	B4	1	17.4	17.22	25.11	4.21	35.46	34.2	53.77	36.11	250.11	19.59		56.67	38.81	78.45	31.81	44.09	36.25	26.67
Hongxing 990	CK	A1	B1	2	12.6	23.02	59.51	59.05	58.38	39.02	53.42	47.76	233.97	23.97		77.78	40.1	68.99	64.86			62.22
Hongxing 990	60mmol/L	A1	B2	2	11.6	21.38	54.77	35.92	62.4	38.59	52.86	48.18	230.06	23.48		55.56	29.34	67.45	47.55	73.3	28.57	47.78
Hongxing 990	120mmol/L	A1	B3	2	10.9	20.62	47.51	30.03	48	27.64	52.46	45.72	236.61	23.8		38.89	33.14	65.66	34.86	53.75	50	32.22
Hongxing 990	180mmol/L	A1	B4	2	10.5	19.83	34.37	21.67	23.3	41.26	52.45	47.07	227.24	24.44		28.89	26	76.05	24.17	37.26	62.86	24.44
Ping'an 1523	CK	A2	B1	2	16.3	25.92	71.92	67.12	151.78	42.9	52.72	41.41	218.36	22.85		46.67	31.02	59.85	44.26			44.44
Ping'an 1523	60mmol/L	A2	B2	2	16.7	22.52	60.59	39.84	102.49	47.02	55.6	43.75	231.03	22.51		34.44	36.65	51.75	22.59	51.05	26.19	17.78
Ping'an 1523	120mmol/L	A2	B3	2	15.1	20.28	48.28	25.39	68.35	43.6	51.75	42.67	219.5	22.29		26.67	30.05	62.82	18.66	42.15	42.86	17.78
Ping'an 1523	180mmol/L	A2	B4	2	10.8	15.76	45.92	13.48	85.91	42.28	52.13	43.28	221.96	24.11		22.22	29.71	63.29	16.16	36.51	52.38	16.67
Huxin 712	CK	A3	B1	2	13.4	22.16	73.08	53.01	28.06	30.5	51.54	39.19	220.52	19.94		55.56	29.96	59.81	38.29			36.67
Huxin 712	60mmol/L	A3	B2	2	15.2	19.78	64.15	46.05	20.91	41.49	49.96	42.04	220.88	20.9		42.22	19.84	64.29	31.06	81.14	24	27.78
Huxin 712	120mmol/L	A3	B3	2	11.5	18.73	63.94	28.71	28.1	29.45	53.85	38.66	226.22	20.87		38.89	41.03	57.07	26.53	69.29	30	24.44
Huxin 712	180mmol/L	A3	B4	2	7.9	15.71	48.16	23.65	24.26	39.61	49.85	40.59	225.56	20.88		27.78	39.74	76.88	13.94	36.4	50	12.22
Seedstar 618	CK	A4	B1	2	10.7	25.79	70.44	103.47	80.76	38.43	47.59	43.09	202.98	23.59		52.22	43.3	69.28	43.7			41.11
Seedstar 618	60mmol/L	A4	B2	2	10.4	22.84	63.98	47.98	52.52	37.34	47.52	41.24	208.15	22.52		42.22	37.77	73.85	32.87	75.21	19.15	31.11
Seedstar 618	120mmol/L	A4	B3	2	12.8	19.87	55.19	26.98	57.35	39.55	50.18	40.58	210.91	23.43		32.22	28.35	76.69	26.34	60.28	38.3	23.33
Seedstar 618	180mmol/L	A4	B4	2	14	17.56	52.86	13.44	34.74	37.81	49.38	41.41	208.51	21.98		21.11	23	78.99	15.93	36.44	59.57	14.44
Simon 6	CK	A5	B1	2	18.1	23.18	67.97	61.36	37.07	36.29	51.28	49.26	231.33	22.24		81.11	28.38	64.54	66.3			64.44
Simon 6	60mmol/L	A5	B2	2	21	22.48	41.66	39.93	40.42	32.41	50.57	46.14	234.45	22.08		67.78	23.05	70.37	60.88	91.83	16.44	60
Simon 6	120mmol/L	A5	B3	2	21.2	18.96	29.76	34.96	29.44	36.69	51.76	47.05	227.36	22.42		56.67	25.59	74.48	52.18	78.7	30.14	50
Simon 6	180mmol/L	A5	B4	2	17.7	18.73	20.29	29.3	23.64	40.54	51.32	46.72	230.49	22.12		52.22	31.76	73.24	33.43	50.42	35.62	28.89
Hongxing 528	CK	A6	B1	2	12.3	21.9	66.84	60.05	29.06	40.04	54.06	36.31	209.77	22.34		66.67	33.73	73.46	59.49			60
Hongxing 528	60mmol/L	A6	B2	2	11.8	20.92	42.64	43.57	30.7	44.48	52.99	35.87	210.07	22.39		47.78	40.05	66.33	42.45	71.36	28.33	40
Hongxing 528	120mmol/L	A6	B3	2	13.9	17.11	40.93	28.33	32.48	41.75	53.46	38.29	203.46	22.8		40	44.25	78.04	33.89	56.96	40	33.33
Hongxing 528	180mmol/L	A6	B4	2	11.8	14.87	34.51	15.4	34.84	46.2	52.23	36.48	210.31	21.68		30	34.03	74.24	24.86	41.79	55	25.56
Zengyu 157	CK	A7	B1	2	23.5	25.42	88.45	94.97	62.67	34.84	55.48	38.53	255.82	24.69		82.22	30.04	72.82	44.49			38.89
Zengyu 157	60mmol/L	A7	B2	2	20.4	23.73	69.7	44.56	41.46	39.06	54.92	38.01	254.2	24.23		46.67	37.42	68.75	28.98	65.14	43.24	24.44
Zengyu 157	120mmol/L	A7	B3	2	21.3	21.95	65.47	22.88	39.82	39.22	53.88	38.72	240.63	23.54		41.11	25.59	70.86	19.44	43.7	50	15.56
Zengyu 157	180mmol/L	A7	B4	2	18	20.63	53.46	18.64	38.88	37.21	56.34	36.76	243.58	23.68		27.78	40.28	62.49	9.03	20.29	66.22	7.78
Wofeng 188	CK	A8	B1	2	10.5	22.48	38.42	48.4	43.26	42.45	52.69	44.43	238.36	20.98		83.33	40.58	75.64	55.32			51.11
Wofeng 188	60mmol/L	A8	B2	2	13.1	21.4	35.16	32.94	40.79	39.22	54.04	44.32	243.84	22.34		48.89	34.4	67.46	39.21	70.88	41.33	36.67
Wofeng 188	120mmol/L	A8	B3	2	12.3	19.71	11.6	16.6	34.14	39.85	52.18	44.59	242.05	21.54		42.22	50.6	84.37	27.5	49.71	49.33	24.44
Wofeng 188	180mmol/L	A8	B4	2	7.6	15.26	7.95	10.24	22.61	40.31	52.38	43.94	242.53	20.79		30	73.77	82.62	18.24	32.97	64	15.56
Yuhe 536	CK	A9	B1	2	14.9	22.84	85.93	75.71	83.81	35.63	56.63	44.07	240.09	23.48		46.67	33.28	56.43	39.4			37.78
Yuhe 536	60mmol/L	A9	B2	2	16.5	18.96	71.37	44.25	49.08	33.69	54.07	43.5	238.24	21.99		34.44	24.61	63.6	24.72	62.75	26.19	21.11
Yuhe 536	120mmol/L	A9	B3	2	14	17.08	62.6	38.46	53.24	36.06	55.23	42.44	232.82	22.43		22.22	41.11	61.98	13.29	33.73	52.38	11.11
Yuhe 536	180mmol/L	A9	B4	2	12.1	15.92	34.17	17.12	45.72	37.61	57.88	42.4	230.38	23.7		15.56	37.94	69.42	8.24	20.92	66.67	8.89
Wofeng No.9	CK	A10	B1	2	12.8	23.09	85.81	39.11	80.3	42.45	53.54	41.83	245.27	24.63		61.11	30.93	72.7	53.38			53.33
Wofeng No.9	60mmol/L	A10	B2	2	14.6	21.77	66.95	24.34	51.41	37.18	53.44	40.37	245.09	23.58		55.56	21.67	75.84	44.91	84.13	9.09	44.44
Wofeng No.9	120mmol/L	A10	B3	2	13.6	17.15	36.39	21.66	33.03	39.12	54.64	41.58	250.57	23.73		47.78	39.06	77.15	28.29	52.99	21.82	26.67
Wofeng No.9	180mmol/L	A10	B4	2	9.4	15.12	23.68	16.62	32.95	36.72	54.32	41.78	248.66	23.82		23.33	16.65	80.35	17.55	32.87	61.82	16.67
Nongfu 99	CK	A11	B1	2	14.9	23.48	72.39	60.04	65.86	39.58	55.14	37.3	258.31	20.91		95.56	33.17	84.39	86.11			88.89
Nongfu 99	60mmol/L	A11	B2	2	19.5	21.68	61.69	44.95	61.41	42.77	54.41	35.75	259.68	22.28		90	27.19	73	76.11	88.39	5.81	81.11
Nongfu 99	120mmol/L	A11	B3	2	15.4	18.98	50.81	26.87	80.27	28.36	55.28	37.64	260.99	21.82		86.67	24.88	82.7	67.36	78.23	9.3	68.89
Nongfu 99	180mmol/L	A11	B4	2	11.4	18.09	36.97	16.2	52.14	45.31	54.66	36.36	251.46	22.22		80	32.17	80.79	58.24	67.63	16.28	56.67
Xuanhe 8	CK	A12	B1	2	14.5	23.48	72.28	28.4	50.41	37.97	45.23	38.48	239.49	24.69		93.33	25.88	79.89	76.16			77.78
Xuanhe 8	60mmol/L	A12	B2	2	18.5	22.11	59.45	11.77	51.84	39.22	48.62	36.37	242.05	24.06		91.11	23.14	78.86	72.18	94.77	2.38	74.44
Xuanhe 8	120mmol/L	A12	B3	2	18.8	17.88	57.23	10.42	70.64	40.3	46.27	38.39	238.24	25.57		87.78	25.18	72.38	66.57	87.42	5.95	72.22
Xuanhe 8	180mmol/L	A12	B4	2	12.5	15.3	31.22	6.97	42.37	49.09	46.79	37.61	226.8	24.38		82.22	37.76	77.77	60.14	78.97	11.9	62.22
Simon 668	CK	A13	B1	2	20.6	21.56	33.6	42.2	88.17	43.63	55.39	35.96	243.24	20.55		92.22	26.73	75.49	66.3			64.44
Simon 668	60mmol/L	A13	B2	2	16.3	19.83	29.77	32.32	72.1	36.55	56.17	37.18	237.17	19.21		78.89	23.84	76.79	57.69	87.01	14.46	57.78
Simon 668	120mmol/L	A13	B3	2	15.4	18.52	28.5	16.08	33.08	39.29	57.65	36.03	232.64	19.73		63.33	26.49	74.62	47.18	71.16	31.33	45.56
Simon 668	180mmol/L	A13	B4	2	8.6	17.82	22.72	4.23	41.68	37.48	55.41	37.86	251.1	19.89		55.56	24.4	73.6	35.28	53.21	39.76	30
Linyu 1339	CK	A14	B1	2	18	20.72	77.23	72.69	73.18	40.27	58.96	36.57	230.91	21.69		72.22	37.12	69.15	51.67			50
Linyu 1339	60mmol/L	A14	B2	2	15.5	19.57	51.96	37.51	61.38	35.76	55.76	38.24	221.74	21.02		63.33	29.11	70.87	45.37	87.81	12.31	43.33
Linyu 1339	120mmol/L	A14	B3	2	15.1	18.93	49.16	22.61	28.19	37.01	57.17	39.06	235.68	20.88		50	36.62	71.44	28.8	55.73	30.77	24.44
Linyu 1339	180mmol/L	A14	B4	2	10.8	17.88	35.67	7.21	48.54	33.63	55.54	38.39	229.19	21.46		31.11	38.49	74.41	20.09	38.89	56.92	16.67
Yuanyuan 1	CK	A15	B1	2	16.8	24.21	76.54	76.59	62.14	38.46	52.45	42.95	200.36	20.65		96.67	29.85	67.64	72.08			72.22
Yuanyuan 1	60mmol/L	A15	B2	2	14.9	22.64	40.8	47.04	55.96	39.22	54.48	42.89	211.84	20.28		90	22.81	73.86	62.22	86.32	6.9	68.89
Yuanyuan 1	120mmol/L	A15	B3	2	13.6	21.58	39.69	29.19	34.62	44.12	51.9	43.9	219.97	21.17		60	20.6	78.38	42.31	58.7	37.93	38.89
Yuanyuan 1	180mmol/L	A15	B4	2	12.1	20.58	36.23	12.58	39.5	39.12	51.73	43.21	204.4	21.61		46.67	30.66	80.26	29.95	41.55	51.72	28.89
Qunze 888	CK	A16	B1	2	17.4	22.18	81.15	74.72	97.61	35.63	48.68	42.99	238.15	24.69		44.44	48.02	75.98	36.02			35.56
Qunze 888	60mmol/L	A16	B2	2	17.5	20.9	72.75	42.27	63.09	39.94	49.66	43.56	230.36	23.39		36.67	43.93	69.62	27.04	75.06	17.5	26.67
Qunze 888	120mmol/L	A16	B3	2	13.1	20.08	44.99	25.36	45.74	38.89	47.24	43.63	229.96	24.29		31.11	36.7	73.93	20.79	57.71	30	21.11
Qunze 888	180mmol/L	A16	B4	2	14.8	19.28	36.5	13.07	59.58	39.32	47.92	42.33	237.23	25.18		23.33	45.2	75.1	15.69	43.57	47.5	17.78
Shanning 23	CK	A17	B1	2	20.2	25.99	86.03	79.88	61.24	43.5	50.51	39.37	205.03	18.95		25.56	38.03	72.31	17.73			18.89
Shanning 23	60mmol/L	A17	B2	2	20.5	21.7	69.54	70.82	45.46	39.55	47.35	39.98	220.32	19.35		20	41.17	74.93	12.78	72.06	21.74	11.11
Shanning 23	120mmol/L	A17	B3	2	17.1	20.53	68.34	56.52	31.17	37.9	50.38	41.87	218.7	19.25		14.44	39.05	61.42	9.68	54.57	43.48	10
Shanning 23	180mmol/L	A17	B4	2	9.2	18.82	54.68	31.95	33.06	30.14	50.3	41.1	215.65	20.89		11.11	43.22	86.63	6.9	38.9	56.52	6.67
Youqi 909	CK	A18	B1	2	10	24.23	72.75	47.95	19.18	40.7	57.68	41.79	201.05	25.95		90	21.53	68.33	66.57			63.33
Youqi 909	60mmol/L	A18	B2	2	12.8	21.4	51.77	37.2	20.58	44.19	56.61	41.87	216.4	25.79		70	29.98	70.43	44.49	66.83	22.22	42.22
Youqi 909	120mmol/L	A18	B3	2	10.1	16.22	48.7	25.48	36.34	42.25	57.58	41.16	208.66	24.75		50	43.34	69.03	37.08	55.7	44.44	37.78
Youqi 909	180mmol/L	A18	B4	2	9.9	15.19	25.81	11.57	15.1	40.34	55.5	43.13	208.43	25.34		34.44	44.14	77.09	26.25	39.43	61.73	26.67
Jin'ai 588	CK	A19	B1	2	13.4	19.85	89.37	99.35	52.66	38.1	47.1	44.7	248.48	22.17		84.44	19.34	75.38	63.29			74.44
Jin'ai 588	60mmol/L	A19	B2	2	13.3	17.66	42.59	53.03	40	38.36	46.09	42.78	242.01	23.62		80	23.14	73.19	52.13	82.37	5.26	57.78
Jin'ai 588	120mmol/L	A19	B3	2	10.3	16.06	38.39	23.57	30.36	36.98	48.2	43.3	245.71	22.19		68.89	51.79	85.48	46.85	74.03	18.42	53.33
Jin'ai 588	180mmol/L	A19	B4	2	8	15.07	28.96	10.48	29.69	37.54	48.91	42.58	240.28	21.72		54.44	40.56	77.59	29.77	47.04	35.53	33.33
Ganxin 2818	CK	A20	B1	2	15.5	21.65	39.83	59.93	46.69	36.13	50.33	39.18	220.49	22.89		44.44	25.77	86.48	35.32			36.67
Ganxin 2818	60mmol/L	A20	B2	2	16.6	19.67	35.52	19.95	52.51	35.27	49.67	40.63	216.51	22.83		24.44	28.6	75.63	12.55	35.52	45	11.11
Ganxin 2818	120mmol/L	A20	B3	2	17.7	17.79	28.81	12.72	69.28	37.18	51.7	39.13	230.65	21.83		15.56	31.16	74.36	9.54	27	65	10
Ganxin 2818	180mmol/L	A20	B4	2	13	17.47	27.86	7.97	52.13	38.53	51.12	39.71	226.72	22.1		12.22	30.38	83.28	7.36	20.84	72.5	8.89
Wugu 568	CK	A21	B1	2	10.8	22.7	82.95	86.76	31.01	39.48	51.79	43.26	246.05	22.53		81.11	28.22	84.11	64.35			74.44
Wugu 568	60mmol/L	A21	B2	2	12.4	19.96	71.78	33.54	35.14	44.95	49.76	42.52	254.42	22.74		71.11	39.25	78.75	48.56	75.47	12.33	68.89
Wugu 568	120mmol/L	A21	B3	2	12.9	18.96	70.14	16.83	30.75	46.39	52.88	41.88	249.63	24.05		65.56	23.95	77.92	38.52	59.86	19.18	54.44
Wugu 568	180mmol/L	A21	B4	2	13.5	17.2	60.01	10.43	30.71	35.9	52.33	42	241.96	22.25		35.56	21.58	79.95	21.57	33.53	56.16	25.56
Zheng Shan 958	CK	A22	B1	2	19.2	25.24	74.98	22.44	26.3	42.21	54.49	35.19	236.63	24.34		92.22	17.19	71.72	66.94			70
Zheng Shan 958	60mmol/L	A22	B2	2	16.3	22.22	60.68	20.84	36.4	41.62	55.4	37.45	239.32	23.95		87.78	31.86	67.3	58.61	87.55	4.82	55.56
Zheng Shan 958	120mmol/L	A22	B3	2	15.2	17.82	46.77	10.52	36.98	38.53	55.63	35.53	240.09	24.22		80	18.72	73.37	48.8	72.89	13.25	44.44
Zheng Shan 958	180mmol/L	A22	B4	2	14.4	17.02	30.26	7.27	24.81	39.02	54.32	36.87	242.25	24.48		76.67	15.48	74.48	37.87	56.57	16.87	36.67
HengYu369	CK	A23	B1	2	13.2	22.75	89.7	130.22	73.91	38.43	48.89	33.3	248.98	21.87		96.67	31.35	76.46	93.7			92.22
HengYu369	60mmol/L	A23	B2	2	11.1	19.85	46.75	23.19	63.51	39.71	52.1	35.03	239.15	22.09		92.22	24.63	78.09	87.87	93.77	4.6	88.89
HengYu369	120mmol/L	A23	B3	2	10.7	19.1	41.25	16.97	51.25	35.47	49.98	33.98	250.04	21.88		88.89	28.7	80.18	80.88	86.31	8.05	85.56
HengYu369	180mmol/L	A23	B4	2	6.9	14.62	30.95	13.44	50.8	39.22	51.72	36.08	257.47	22.19		87.78	29.54	80.21	77.69	82.91	9.2	82.22
Xianghe 9918	CK	A24	B1	2	9.3	20.51	76.24	42.81	57.82	39.55	54.09	42.02	212.52	21.95		94.44	33.66	72.53	83.89			80
Xianghe 9918	60mmol/L	A24	B2	2	12.9	17.98	44.04	38.53	69.4	37.11	52.3	41.3	218.37	23.02		92.22	45.09	81.7	79.17	94.37	2.35	75.56
Xianghe 9918	120mmol/L	A24	B3	2	11.2	16.58	32.8	18.44	39.77	35.44	53.77	40.63	218.37	22.27		90	32.97	74.94	75.09	89.51	4.71	72.22
Xianghe 9918	180mmol/L	A24	B4	2	10.7	14.75	30.22	9.48	31.49	32.9	53.72	41.73	212.17	22.93		88.89	42.96	72.42	69.81	83.22	5.88	66.67
Xingnong No.1	CK	A25	B1	2	17.8	20.56	64.49	71.04	43.62	40.17	54.97	37.88	240.5	23.38		76.67	27.62	72.03	63.15			60
Xingnong No.1	60mmol/L	A25	B2	2	18.3	18.25	49	29.96	58.4	40.21	52.79	36.98	249.45	22.59		57.78	22.46	68.31	41.44	65.62	24.64	38.89
Xingnong No.1	120mmol/L	A25	B3	2	17.5	17.04	45.59	28.12	45.58	41.52	52.34	37.2	245.94	23.1		51.11	23.69	68.3	35.69	56.52	33.33	35.56
Xingnong No.1	180mmol/L	A25	B4	2	16.7	15.94	38.48	21.83	49.7	41.89	55.11	36.84	249.16	22.65		41.11	36.83	76.32	21.81	34.53	46.38	15.56
Bixiang 809	CK	A26	B1	2	12.5	22.57	67.11	78.68	32.28	37.58	49.91	40.02	253.49	25.17		82.22	38.08	66.59	46.3			40
Bixiang 809	60mmol/L	A26	B2	2	12.3	20.47	58.97	44.12	24.84	40.77	47.3	40.84	256.59	24.86		55.56	32.01	67.96	35.74	77.2	32.43	35.56
Bixiang 809	120mmol/L	A26	B3	2	12.7	17.57	54.38	43.63	28.66	34.48	47.9	41.04	254.43	24.37		41.11	31.81	69.01	27.04	58.4	50	31.11
Bixiang 809	180mmol/L	A26	B4	2	7.8	16.51	39.54	24.15	27.01	33.13	48.41	41.72	255.71	23.96		37.78	38.2	69.19	19.49	42.1	54.05	17.78
Jinfengjie 607	CK	A27	B1	2	14.2	22.59	71.9	81.25	64.68	32.74	47.23	41.98	239.27	21.31		90	25.58	82.78	69.12			72.22
Jinfengjie 607	60mmol/L	A27	B2	2	13	19.48	47.29	50.06	55.21	38.33	45.83	41.51	241.31	22.16		83.33	59.72	77.91	60.37	87.34	7.41	63.33
Jinfengjie 607	120mmol/L	A27	B3	2	11.4	16.7	40.62	20.04	34.14	42.21	45.89	39.13	250.39	21		72.22	32.35	82.21	51.76	74.88	19.75	58.89
Jinfengjie 607	180mmol/L	A27	B4	2	8.4	15.56	38.36	16.89	37.69	41.36	47.32	42.28	233.65	22.01		63.33	59.3	77.36	44.31	64.1	29.63	46.67
Jinongyu 309	CK	A28	B1	2	11.2	22.66	80.37	88.17	32.83	35.34	51.86	42.45	224.93	25.72		90	36.72	74.68	64.91			64.44
Jinongyu 309	60mmol/L	A28	B2	2	12.5	21.65	54.13	45.83	39	38.53	52.74	42.76	226.8	25.34		83.33	28.06	77.29	60.97	93.94	7.41	62.22
Jinongyu 309	120mmol/L	A28	B3	2	14.9	19.69	44.91	42.31	22.29	36.42	52.71	40.91	223.99	23.98		77.78	27.33	77.08	52.27	80.53	13.58	55.56
Jinongyu 309	180mmol/L	A28	B4	2	9.9	16.61	28.99	32.12	12.71	30.2	52.51	40.73	237.22	25.09		50	69.91	80.28	39.95	61.55	44.44	40
Xinyu 81	CK	A29	B1	2	11.9	23.42	64.64	55.54	36.21	33.2	53.04	34.3	233.86	25.83		90	79.14	77.62	67.55			70
Xinyu 81	60mmol/L	A29	B2	2	14.9	22.45	53.24	21.37	54.12	37.97	53.95	35.02	230.23	24.82		86.67	30.1	82.57	61.53	91.09	3.7	65.56
Xinyu 81	120mmol/L	A29	B3	2	13.5	15.81	41.45	20.71	39.36	39.94	54.14	33.37	222.15	26.7		77.78	17.34	85.14	45.69	67.65	13.58	54.44
Xinyu 81	180mmol/L	A29	B4	2	16.6	15.03	35.79	12.56	45.4	39.32	55.47	34.29	234.04	26.07		75.56	22.3	78.36	40.88	60.52	16.05	46.67
Xinyu 24	CK	A30	B1	2	21.8	23.96	73.56	27.13	41.61	45.11	50.32	38.48	264.32	20.41		72.22	28.43	69.04	58.52			57.78
Xinyu 24	60mmol/L	A30	B2	2	17.6	22.11	52.64	25.4	47.99	42.71	49.72	38.2	258.17	21.32		68.89	26.84	66.6	51.53	88.05	4.62	47.78
Xinyu 24	120mmol/L	A30	B3	2	16.1	20.58	45.73	21.62	63.12	36.72	51.97	38.65	259.87	22.81		66.67	18.2	64.84	44.49	76.03	7.69	43.33
Xinyu 24	180mmol/L	A30	B4	2	12.2	19.76	35.13	14.46	33.83	40.9	52.64	37.56	265.43	21.83		60	26.86	70.43	32.64	55.78	16.92	32.22
Denghai 3672	CK	A31	B1	2	18.1	24.26	76.04	32.35	49.42	32.94	52.35	37.71	253.6	20.07		81.11	23.16	81.01	60.23			70
Denghai 3672	60mmol/L	A31	B2	2	15.8	22.22	64.57	21.28	32.76	37.94	53.31	35.71	235.86	21.12		70	35.06	77.71	45.56	75.63	13.7	52.22
Denghai 3672	120mmol/L	A31	B3	2	14.7	20.42	56.75	15.22	22.58	44.52	53.64	36.17	238.14	21.11		68.89	33.24	84.38	35.05	58.19	15.07	40
Denghai 3672	180mmol/L	A31	B4	2	15.1	18.16	34.61	12.14	26.26	42.41	53.45	34.79	250.26	21.06		40	19.69	80.2	23.61	39.2	50.68	27.78
Xinyu 66	CK	A32	B1	2	17.2	19.73	67.8	53.27	96.03	37.74	51.56	41.8	249.27	21.93		95.56	27.46	74.13	89.91			92.22
Xinyu 66	60mmol/L	A32	B2	2	15.6	18.71	55.14	23.9	158.13	41.36	50.58	42.03	257.06	21.59		92.22	21.44	76.73	73.56	81.82	3.49	75.56
Xinyu 66	120mmol/L	A32	B3	2	19.5	17.79	44.8	18.54	102.74	43.14	48.2	41.53	251.73	21.75		83.33	17.57	76.19	63.89	71.06	12.79	73.33
Xinyu 66	180mmol/L	A32	B4	2	12.4	17.02	34.56	13.35	110.28	39.98	51.61	42.15	255.88	22.03		80	18.25	80.32	60.23	66.99	16.28	70
Xinnong 008	CK	A33	B1	2	15.6	24.21	78.38	76.29	112.2	45.97	47.43	37.85	239.08	26.29		81.11	29.6	65.51	59.44			62.22
Xinnong 008	60mmol/L	A33	B2	2	17.8	22.29	35.88	47.95	103.37	41.82	49.84	38.73	236.21	25.33		76.67	44.84	67.85	51.57	86.76	5.48	56.67
Xinnong 008	120mmol/L	A33	B3	2	16.4	21.4	29.08	24.7	101.45	39.58	50.01	37.66	249.38	24.76		60	40.72	65.93	44.95	75.62	26.03	48.89
Xinnong 008	180mmol/L	A33	B4	2	12.9	20.58	28.01	17.68	108.57	40.27	48.86	37.34	248.39	25.47		33.33	42.75	75.66	25.93	43.61	58.9	26.67
Xianyu 335	CK	A34	B1	2	16.3	19.42	89.61	56.83	30.25	36.23	58.61	36.25	215.77	23.54		98.89	19.67	76.9	96.62			93.33
Xianyu 335	60mmol/L	A34	B2	2	13.7	18.64	36.37	39.49	24.92	38.89	57.3	36.17	232.28	23.01		95.56	35.33	78.38	92.04	95.26	3.37	88.89
Xianyu 335	120mmol/L	A34	B3	2	11.5	16.29	26.91	29.96	19.19	34.25	56.68	36.78	220.81	22.11		91.11	39.15	77.72	85.88	88.88	7.87	82.22
Xianyu 335	180mmol/L	A34	B4	2	8.7	15.01	24.07	17.23	21.93	37.02	56.38	34.05	224.96	22.75		82.22	36.25	84.75	76.02	78.68	16.85	73.33
Fengtian14	CK	A35	B1	2	11.1	22.84	91.01	98.46	30.72	39.98	53.09	33.92	258.64	20.97		36.67	33.95	77.59	26.2			23.33
Fengtian14	60mmol/L	A35	B2	2	9.5	20.12	40.96	22.93	30.64	36.33	51.78	34.47	251.43	20.67		28.89	46.87	78.99	20.28	77.39	21.21	18.89
Fengtian14	120mmol/L	A35	B3	2	9.5	17.13	37.88	19.41	30.62	32.77	54.12	33.96	260.1	21.34		20	39.89	62.98	11.25	42.93	45.45	8.89
Fengtian14	180mmol/L	A35	B4	2	9	15.46	24.6	18.41	17.65	37.61	53.6	35.68	256	20.46		17.78	28.01	77.74	8.19	31.27	51.52	6.67
Fuyu 109	CK	A36	B1	2	18.1	18.34	60.18	58.02	48.49	40.7	47.4	45.41	208.22	21.69		51.11	31.25	64.8	47.22			44.44
Fuyu 109	60mmol/L	A36	B2	2	21.6	17.11	42.02	40.32	63.26	43.07	46.7	43.22	219.28	21.58		46.67	37.48	79.64	39.68	84.02	8.7	36.67
Fuyu 109	120mmol/L	A36	B3	2	17.3	15.14	36.62	31.61	60.59	36.16	46.34	43.17	216.17	21.03		44.44	21.44	77.68	37.22	78.82	13.04	32.22
Fuyu 109	180mmol/L	A36	B4	2	13.8	14.46	23.87	20.55	58.65	39.58	47.23	44.91	218.59	21.86		41.11	23.67	77.97	30.28	64.12	19.57	26.67
Simon 3358	CK	A37	B1	2	10.8	22.32	62.01	48.06	37.11	35.07	55.65	37.24	261.06	23.31		77.78	21.14	90.64	64.91			58.89
Simon 3358	60mmol/L	A37	B2	2	9.5	21.4	50.86	39.31	27.59	38.2	55.34	37.85	267.63	24.39		76.67	26.67	73.69	61.16	94.22	1.43	55.56
Simon 3358	120mmol/L	A37	B3	2	8.6	19.12	35.86	24	27.09	39.32	56.32	36.84	261.46	23.19		37.78	33.25	79.06	33.43	51.5	51.43	32.22
Simon 3358	180mmol/L	A37	B4	2	11	16.51	30.46	16.97	25.84	41.89	58.45	38.4	257.77	23.83		20	34.03	80.07	14.81	22.82	74.29	12.22
Jixing218	CK	A38	B1	2	16.7	22.2	81.31	62.68	49.9	27.11	55	43.07	234.32	20.57		30	28.22	72.46	23.24			22.22
Jixing218	60mmol/L	A38	B2	2	17.6	20.53	54.91	36.86	46.63	31.72	54.94	42.03	247.17	20.17		17.78	26.89	76.18	12.59	54.18	40.74	12.22
Jixing218	120mmol/L	A38	B3	2	12.8	19.3	34.62	18.6	41.75	31.55	55.41	42.53	245.04	21.06		12.22	23.89	76.82	8.47	36.45	59.26	7.78
Jixing218	180mmol/L	A38	B4	2	12.9	17.86	23.68	17.74	55.37	30.83	54.03	42.61	238.87	21.74		10	32.79	78.28	5.69	24.5	66.67	5.56
Sanmeng 9599	CK	A39	B1	2	9.6	23	72.46	77.92	25.81	37.08	49.96	43.51	235.01	27.23		90	38.62	78.08	72.13			63.33
Sanmeng 9599	60mmol/L	A39	B2	2	12	21.38	41.05	20.29	46.34	39.75	51.99	43.4	233.75	25.74		73.33	44.43	76.72	61.94	85.88	18.52	57.78
Sanmeng 9599	120mmol/L	A39	B3	2	13	19.23	25.03	8.06	22.39	44.58	49.5	43.17	239.97	25.87		57.78	21.6	78.97	46.39	64.31	35.8	40
Sanmeng 9599	180mmol/L	A39	B4	2	8.5	15.08	23.32	6.88	29.95	39.35	49.1	43.72	228.73	25.26		33.33	46.72	82.94	26.48	36.71	62.96	22.22
Simon 208	CK	A40	B1	2	15.2	21.08	61.41	77.78	67.58	39.15	47.21	35.77	229.83	26.44		86.67	31.05	72.51	67.78			77.78
Simon 208	60mmol/L	A40	B2	2	18.2	18.04	52.77	51.32	29.28	40.64	49.25	37.08	230.29	26.52		73.33	42.28	80.2	53.8	79.37	15.38	61.11
Simon 208	120mmol/L	A40	B3	2	11.2	14.71	41.23	19.54	43.23	41.36	49.86	35.18	221.47	26.19		72.22	42.44	84.75	43.38	64	16.67	50
Simon 208	180mmol/L	A40	B4	2	9	13.52	37.74	17.78	23.45	31.39	46.88	37.34	231.67	25.51		70	32.33	84.38	31.48	46.45	19.23	33.33
Huxin 338	CK	A41	B1	2	14.2	22.61	76.37	49.98	22.89	41.23	54.9	36.55	252.07	20.03		90	31.22	69.64	73.47			72.22
Huxin 338	60mmol/L	A41	B2	2	17.3	19.37	60.89	17.74	33.26	34.75	55.29	38.43	245.85	20.24		85.56	23.69	85.22	63.15	85.95	4.94	60
Huxin 338	120mmol/L	A41	B3	2	16.1	18.55	34.76	4.42	23.98	42.41	54.96	35.08	243.37	20.56		73.33	39.06	81.18	44.07	59.99	18.52	35.56
Huxin 338	180mmol/L	A41	B4	2	17.2	16.99	24.78	4.15	35	33.76	55.18	36.57	244.12	20.35		57.78	38.31	77.44	33.06	44.99	35.8	26.67
Hongxing 990	CK	A1	B1	3	13.1	23.93	61.81	61.36	60.67	40.55	53.36	47.18	234.69	24.77		78.89	41.67	71.7	63.24			60
Hongxing 990	60mmol/L	A1	B2	3	12.1	22.22	56.9	37.33	64.86	40.12	55.68	46.33	230.67	23.6		53.33	30.5	70.11	48.47	76.65	32.39	46.67
Hongxing 990	120mmol/L	A1	B3	3	11.3	21.44	49.32	31.2	49.89	28.73	52.42	45.11	223.04	24.4		40	34.44	68.25	33.7	53.29	49.3	31.11
Hongxing 990	180mmol/L	A1	B4	3	10.9	20.61	35.67	22.52	24.21	42.88	54.39	46.73	236.01	24.85		27.78	27.03	79.04	25.32	40.04	64.79	24.44
Ping'an 1523	CK	A2	B1	3	17	26.94	74.69	69.75	157.75	44.59	52.42	41.83	215.95	23.74		47.78	32.24	62.2	44.54			44.44
Ping'an 1523	60mmol/L	A2	B2	3	17.4	23.41	62.92	41.41	106.52	48.87	54.03	42.49	233.31	22.54		33.33	38.09	53.79	22.27	50	30.23	21.11
Ping'an 1523	120mmol/L	A2	B3	3	15.7	21.08	50.16	26.38	71.04	45.31	53.37	42.68	217.94	22.41		25.56	31.23	65.29	18.7	42	46.51	18.89
Ping'an 1523	180mmol/L	A2	B4	3	11.2	16.38	47.68	14	89.28	43.94	52.94	42.24	230.24	23.31		22.22	30.87	65.77	15.09	33.89	53.49	15.56
Huxin 712	CK	A3	B1	3	13.9	23.03	75.88	55.08	29.16	31.7	50.72	40.69	220.58	20.96		56.67	31.14	62.16	40.28			36.67
Huxin 712	60mmol/L	A3	B2	3	15.8	20.56	66.63	47.82	21.73	43.12	50.66	41.15	233.97	21.03		42.22	20.62	66.81	29.81	74.02	25.49	27.78
Huxin 712	120mmol/L	A3	B3	3	11.9	19.46	66.41	29.83	29.2	30.6	52.48	40.33	218.9	19.67		37.78	42.64	59.31	25.37	62.99	33.33	25.56
Huxin 712	180mmol/L	A3	B4	3	8.2	16.33	49.99	24.58	25.21	41.17	50.26	41.51	220.52	20.09		27.78	41.3	79.9	13.89	34.48	50.98	12.22
Seedstar 618	CK	A4	B1	3	11.1	26.8	73.08	107.47	83.93	39.94	47.75	42.71	209.89	22.73		51.11	45	72	42.78			43.33
Seedstar 618	60mmol/L	A4	B2	3	10.8	23.74	66.49	49.86	54.58	38.81	48.21	42.12	209.59	22.72		40	39.25	76.75	32.04	74.89	21.74	30
Seedstar 618	120mmol/L	A4	B3	3	13.4	20.65	57.31	28.04	59.61	41.1	50.28	42.17	203.58	22.83		31.11	29.46	79.7	26.3	61.47	39.13	25.56
Seedstar 618	180mmol/L	A4	B4	3	14.5	18.25	54.86	13.97	36.11	39.29	50	41.06	207.19	22.64		21.11	23.9	82.08	14.63	34.2	58.7	15.56
Simon 6	CK	A5	B1	3	18.8	24.09	70.59	63.77	38.53	37.72	50.39	46.6	235.65	22.22		80	29.49	67.07	66.62			65.56
Simon 6	60mmol/L	A5	B2	3	21.8	23.36	43.27	41.49	42.01	33.68	50.23	46.54	239.55	21.69		66.67	23.96	73.13	60.46	90.76	16.67	58.89
Simon 6	120mmol/L	A5	B3	3	22	19.7	30.85	36.33	30.59	38.13	50.09	46.34	230.73	22.92		56.67	26.6	77.4	51.11	76.72	41.18	50
Simon 6	180mmol/L	A5	B4	3	18.4	19.46	21.08	30.44	24.57	42.13	50.44	45.53	234.51	21.67		52.22	33	76.11	33.29	49.97	53.19	31.11
Hongxing 528	CK	A6	B1	3	12.8	22.76	69.42	62.4	30.2	41.61	53.09	35.59	205.27	22.5		67.78	35.05	76.34	57.59			58.89
Hongxing 528	60mmol/L	A6	B2	3	12.3	21.74	44.28	45.28	31.9	46.23	52.45	35.44	208.21	23.21		48.89	41.62	68.94	41.34	71.78	27.87	42.22
Hongxing 528	120mmol/L	A6	B3	3	14.4	17.78	42.5	29.44	33.76	43.39	53.26	36.77	205.81	21.94		41.11	45.98	81.11	33.84	58.76	39.34	34.44
Hongxing 528	180mmol/L	A6	B4	3	12.3	15.45	35.84	16.01	36.2	48.01	53.54	38.02	213.55	22.82		32.22	35.37	77.15	24.63	42.77	52.46	24.44
Zengyu 157	CK	A7	B1	3	24.4	26.42	91.79	98.68	65.14	36.21	54.74	37.16	246.4	24.46		83.33	31.22	75.68	46.2			40
Zengyu 157	60mmol/L	A7	B2	3	21.2	24.66	72.35	46.3	43.09	40.59	53.42	36.96	257.09	23.54		47.78	38.89	71.45	28.61	61.92	42.67	25.56
Zengyu 157	120mmol/L	A7	B3	3	22.1	22.81	67.99	23.79	41.38	40.76	55.86	38.44	237.81	23.82		40	26.59	73.65	19.03	41.18	52	15.56
Zengyu 157	180mmol/L	A7	B4	3	18.7	21.44	55.48	19.37	40.41	38.67	56.73	37.8	247.48	23.55		24.44	41.87	64.94	9.21	19.94	70.67	7.78
Wofeng 188	CK	A8	B1	3	10.9	23.36	39.91	50.3	44.96	44.11	52.4	43.73	250.63	21.58		83.33	42.17	78.61	56.76			55.56
Wofeng 188	60mmol/L	A8	B2	3	13.6	22.24	36.53	34.23	42.39	40.76	51.74	44.12	242.77	21.96		51.11	35.75	70.11	37.96	66.88	38.67	34.44
Wofeng 188	120mmol/L	A8	B3	3	12.8	20.49	12.05	17.25	35.48	41.41	51.3	44.66	239.31	20.71		43.33	52.59	87.68	27.78	48.94	48	25.56
Wofeng 188	180mmol/L	A8	B4	3	7.9	15.86	8.26	10.64	23.5	41.89	52.28	44.23	239.13	21.96		28.89	76.66	85.86	17.64	31.08	65.33	16.67
Yuhe 536	CK	A9	B1	3	15.5	23.74	89.26	78.68	87.1	37.03	57.01	43.69	226.98	22.58		45.56	34.58	58.64	39.91			38.89
Yuhe 536	60mmol/L	A9	B2	3	17.2	19.7	74.13	45.98	51	35.02	56.13	43.19	239.25	22.19		33.33	25.58	66.1	24.26	60.79	26.83	22.22
Yuhe 536	120mmol/L	A9	B3	3	14.6	17.76	65.02	39.98	55.33	37.48	58.11	42.43	232.46	23.29		23.33	42.73	64.42	13.56	33.99	48.78	12.22
Yuhe 536	180mmol/L	A9	B4	3	12.5	16.55	35.51	17.79	47.52	39.09	56.65	44.39	224.9	23.27		14.44	39.43	72.15	8.56	21.46	68.29	8.89
Wofeng No.9	CK	A10	B1	3	13.3	24	89.12	40.65	83.44	44.11	55.23	41.27	243.36	23.59		62.22	32.15	75.55	53.52			52.22
Wofeng No.9	60mmol/L	A10	B2	3	15.1	22.62	69.53	25.3	53.43	38.64	54.04	41.5	253.37	24.41		54.44	22.53	78.81	43.89	82.01	12.5	43.33
Wofeng No.9	120mmol/L	A10	B3	3	14.1	17.83	37.82	22.52	34.33	40.66	54.57	43.15	245.92	23.89		47.78	40.6	80.18	27.78	51.9	23.21	25.56
Wofeng No.9	180mmol/L	A10	B4	3	9.8	15.71	24.59	17.28	34.24	38.16	56.14	40.77	245.68	24.54		22.22	17.3	83.51	16.25	30.36	64.29	15.56
Nongfu 99	CK	A11	B1	3	15.5	24.4	75.19	62.41	68.45	41.14	55.41	35.23	268.61	21.75		94.44	34.48	87.71	86.34			88.89
Nongfu 99	60mmol/L	A11	B2	3	20.2	22.53	64.07	46.72	63.82	44.46	54.59	37.04	267.42	21.26		90	28.26	75.87	75.19	87.08	4.71	82.22
Nongfu 99	120mmol/L	A11	B3	3	16.1	19.73	52.74	27.93	83.43	29.48	55.57	38.27	265.99	22.22		87.78	25.86	85.95	65.51	75.87	7.06	66.67
Nongfu 99	180mmol/L	A11	B4	3	11.8	18.8	38.39	16.84	54.19	47.09	53.75	38.12	265.7	21.65		82.22	33.44	83.97	56.76	65.74	12.94	55.56
Xuanhe 8	CK	A12	B1	3	15.1	24.4	75.09	29.51	52.39	39.46	46.65	36.48	239.55	24.69		93.33	26.9	83.04	76.48			76.67
Xuanhe 8	60mmol/L	A12	B2	3	19.3	22.98	61.73	12.23	53.88	40.76	48.14	37.6	243.72	24.99		90	24.05	81.96	69.03	90.25	3.57	72.22
Xuanhe 8	120mmol/L	A12	B3	3	19.5	18.59	59.43	10.83	73.42	41.89	45.79	36.94	228.29	25.19		88.89	26.17	75.23	64.72	84.62	4.76	70
Xuanhe 8	180mmol/L	A12	B4	3	13	15.9	32.43	7.24	44.03	51.02	45.16	36.64	227.76	24.74		82.22	39.24	80.83	60.65	79.3	11.9	63.33
Simon 668	CK	A13	B1	3	21.5	22.41	34.92	43.86	91.64	45.34	57.93	35.06	237.17	19.39		91.11	27.79	78.46	67.55			64.44
Simon 668	60mmol/L	A13	B2	3	16.9	20.61	30.92	33.59	74.94	37.99	54.07	35.33	232.82	19.81		77.78	24.78	79.81	57.5	85.13	14.63	60
Simon 668	120mmol/L	A13	B3	3	16	19.25	29.6	16.71	34.38	40.83	55.99	36.07	232.64	20.49		62.22	27.52	77.55	46.9	69.43	31.71	46.67
Simon 668	180mmol/L	A13	B4	3	9	18.51	23.6	4.39	43.32	38.95	54.23	36.84	241.34	20.14		54.44	25.35	76.48	34.54	51.13	40.24	31.11
Linyu 1339	CK	A14	B1	3	18.7	21.53	80.22	75.56	76.05	41.85	56.33	36.49	225.55	20.77		71.11	38.58	71.86	50.88			50
Linyu 1339	60mmol/L	A14	B2	3	16.1	20.34	53.96	38.99	63.79	37.17	56.46	36.18	227.04	21.39		61.11	30.26	73.66	44.4	87.26	14.06	44.44
Linyu 1339	120mmol/L	A14	B3	3	15.6	19.68	51.08	23.51	29.3	38.47	55.03	38.53	237.52	21.18		52.22	38.06	74.25	27.78	54.6	26.56	23.33
Linyu 1339	180mmol/L	A14	B4	3	11.2	18.59	37.05	7.5	50.44	34.95	56.78	38.14	230.02	20.82		34.44	40	77.33	20	39.31	51.56	17.78
Yuanyuan 1	CK	A15	B1	3	17.4	25.16	79.49	79.61	64.57	39.97	53.17	44.94	205.03	20.99		96.67	31.02	70.29	72.64			72.22
Yuanyuan 1	60mmol/L	A15	B2	3	15.5	23.52	42.39	48.9	58.16	40.76	52.95	42.23	209.53	20.9		91.11	23.7	76.75	61.53	84.7	5.75	67.78
Yuanyuan 1	120mmol/L	A15	B3	3	14.1	22.43	41.22	30.34	35.98	45.86	49.92	43.25	218.47	20.57		58.89	21.41	81.46	42.18	58.06	39.08	40
Yuanyuan 1	180mmol/L	A15	B4	3	12.5	21.39	37.64	13.08	41.05	40.66	50.15	42.7	214.61	22.14		46.67	31.87	83.41	30.46	41.94	51.72	31.11
Qunze 888	CK	A16	B1	3	18.1	23.05	84.27	77.67	101.44	37.03	47.53	42.83	235.26	24.77		45.56	49.9	78.96	35.51			34.44
Qunze 888	60mmol/L	A16	B2	3	18.2	21.72	75.57	43.94	65.57	41.51	50.08	41.64	234.51	23.22		36.67	45.66	72.36	26.57	74.84	19.51	27.78
Qunze 888	120mmol/L	A16	B3	3	13.6	20.87	46.74	26.36	47.53	40.42	47.37	42.99	231.57	24.44		33.33	38.14	76.83	21.57	60.76	26.83	22.22
Qunze 888	180mmol/L	A16	B4	3	15.4	20.03	37.92	13.59	61.91	40.86	49.55	44.07	234.97	24.46		25.56	46.97	78.04	15.74	44.33	43.9	17.78
Shanning 23	CK	A17	B1	3	21	27.01	89.34	83.03	63.64	45.2	48.15	40.01	204.28	19.78		26.67	39.52	75.14	18.19			17.78
Shanning 23	60mmol/L	A17	B2	3	21.3	22.55	72.24	73.59	47.25	41.1	49.37	39	217.78	19.34		17.78	42.79	77.86	13.01	71.5	33.33	12.22
Shanning 23	120mmol/L	A17	B3	3	17.7	21.34	70.97	58.75	32.39	39.39	51.62	39.68	212.93	19.56		15.56	40.59	63.83	9.54	52.42	41.67	10
Shanning 23	180mmol/L	A17	B4	3	9.6	19.56	56.8	33.21	34.36	31.32	49.73	38.9	213.68	19.98		12.22	44.92	90.03	5.6	30.79	54.17	5.56
Youqi 909	CK	A18	B1	3	10.4	25.19	75.57	49.84	19.93	42.3	58.1	42.73	199.49	25.56		90	22.37	71.01	66.94			63.33
Youqi 909	60mmol/L	A18	B2	3	13.3	22.24	53.76	38.67	21.39	45.92	54.41	42.39	206.18	24.61		68.89	31.15	73.19	45.32	67.7	23.46	41.11
Youqi 909	120mmol/L	A18	B3	3	10.4	16.85	50.6	26.49	37.76	43.9	57.5	41.82	207.68	24.83		51.11	45.04	71.74	36.57	54.63	43.21	36.67
Youqi 909	180mmol/L	A18	B4	3	10.3	15.79	26.75	12.02	15.69	41.92	57.04	42.53	202.66	24.92		34.44	45.87	80.11	25.46	38.04	61.73	27.78
Jin'ai 588	CK	A19	B1	3	13.9	20.63	92.85	103.24	54.72	39.6	48.22	43.64	244.55	23.32		85.56	20.1	78.33	65.56			75.56
Jin'ai 588	60mmol/L	A19	B2	3	13.8	18.35	44.25	55.11	41.57	39.87	46.59	42.94	244.9	23.81		78.89	24.05	76.06	53.43	81.5	7.79	55.56
Jin'ai 588	120mmol/L	A19	B3	3	10.7	16.69	39.83	24.5	31.55	38.43	49.92	43.95	238.49	21.9		67.78	53.82	88.84	45.42	69.28	20.78	52.22
Jin'ai 588	180mmol/L	A19	B4	3	8.3	15.67	30.05	10.89	30.85	39.02	48.2	44.41	243.92	22.1		55.56	42.16	80.64	28.98	44.21	35.06	32.22
Ganxin 2818	CK	A20	B1	3	16.1	22.5	41.35	62.3	48.52	37.54	51.1	41.11	226.55	22.19		44.44	26.78	89.87	36.85			34.44
Ganxin 2818	60mmol/L	A20	B2	3	17.3	20.44	36.88	20.74	54.57	36.66	51.8	38.55	229.96	22.74		22.22	29.73	78.6	12.08	32.79	50	12.22
Ganxin 2818	120mmol/L	A20	B3	3	18.3	18.49	29.91	13.22	72	38.64	53.27	39.88	226.38	21.74		15.56	32.38	77.28	8.94	24.25	65	10
Ganxin 2818	180mmol/L	A20	B4	3	13.5	18.16	28.92	8.28	54.18	40.04	52.98	38.09	221.47	22.89		12.22	31.57	86.55	6.81	18.47	72.5	8.89
Wugu 568	CK	A21	B1	3	11.2	23.59	86.17	90.16	32.23	41.03	49.82	41.64	248.13	23		80	29.32	87.41	65.42			75.56
Wugu 568	60mmol/L	A21	B2	3	12.9	20.75	74.54	34.86	36.52	46.71	52.13	43.84	250.44	22.05		72.22	40.79	81.84	47.78	73.04	9.72	66.67
Wugu 568	120mmol/L	A21	B3	3	13.4	19.7	72.84	17.49	31.96	48.22	50.64	41.84	245.76	22.81		65.56	24.89	80.99	38.75	59.24	18.06	55.56
Wugu 568	180mmol/L	A21	B4	3	14.1	17.87	62.35	10.84	31.92	37.31	50.92	40.59	249.69	22.52		34.44	22.43	83.09	20.93	31.99	56.94	27.78
Zheng Shan 958	CK	A22	B1	3	20	26.23	77.87	23.32	27.33	43.87	54.78	36.65	230.78	23.96		93.33	17.87	74.54	67.96			70
Zheng Shan 958	60mmol/L	A22	B2	3	16.9	23.1	63.04	21.66	37.83	43.26	54.31	36.23	243.83	24.16		87.78	33.12	69.95	58.01	85.35	5.95	54.44
Zheng Shan 958	120mmol/L	A22	B3	3	15.8	18.51	48.58	10.93	38.43	40.04	57.24	35.24	232.18	23.76		80	19.45	76.25	47.64	70.1	14.29	44.44
Zheng Shan 958	180mmol/L	A22	B4	3	14.9	17.68	31.44	7.56	25.79	40.55	55.21	36.48	232.59	24.14		77.78	16.09	77.4	37.36	54.97	16.67	35.56
HengYu369	CK	A23	B1	3	13.7	23.64	93.17	135.32	76.8	39.94	51.11	35.71	253.2	21.3		97.78	32.58	79.46	94.21			93.33
HengYu369	60mmol/L	A23	B2	3	11.5	20.63	48.55	24.1	66.01	41.27	49.88	34.86	247.58	21.97		93.33	25.6	81.15	87.45	92.83	4.55	87.78
HengYu369	120mmol/L	A23	B3	3	11.1	19.84	42.84	17.64	53.26	36.86	49.73	35.18	247.28	21.39		88.89	29.82	83.32	81.11	86.09	9.09	85.56
HengYu369	180mmol/L	A23	B4	3	7.2	15.19	32.15	13.97	52.8	40.76	51.2	35.16	247.23	20.78		87.78	30.71	83.36	76.3	80.98	10.23	81.11
Xianghe 9918	CK	A24	B1	3	9.7	21.32	79.17	44.49	60.08	41.1	54.8	41.81	225.34	23.21		95.56	34.98	75.37	84.95			77.78
Xianghe 9918	60mmol/L	A24	B2	3	13.4	18.68	45.75	40.04	72.12	38.57	54.8	42.87	214.57	23.2		93.33	46.86	84.91	78.56	92.48	2.33	75.56
Xianghe 9918	120mmol/L	A24	B3	3	11.6	17.23	34.06	19.16	41.33	36.83	55.45	41.36	212.99	23.18		91.11	34.26	77.88	74.35	87.52	4.65	72.22
Xianghe 9918	180mmol/L	A24	B4	3	11.1	15.34	31.39	9.85	32.73	34.2	55.79	40.9	221.88	23.7		86.67	44.65	75.27	70.42	82.89	9.3	67.78
Xingnong No.1	CK	A25	B1	3	18.5	21.37	67.02	73.81	45.34	41.76	53.29	38.12	249.27	23.09		74.44	28.71	74.87	62.36			58.89
Xingnong No.1	60mmol/L	A25	B2	3	19	18.97	50.92	31.13	60.69	41.79	53.81	37.36	247.87	23.14		58.89	23.35	71	40.93	65.63	20.9	38.89
Xingnong No.1	120mmol/L	A25	B3	3	18.2	17.71	47.37	29.23	47.37	43.15	53.81	36.69	249.68	23.37		52.22	24.62	70.98	34.26	54.94	29.85	35.56
Xingnong No.1	180mmol/L	A25	B4	3	17.3	16.57	39.98	22.69	51.65	43.53	54.92	37.21	236.52	22.11		41.11	38.28	79.31	21.76	34.89	44.78	16.67
Bixiang 809	CK	A26	B1	3	13	23.45	69.7	81.76	33.54	39.05	48.28	41.03	266.37	24.82		81.11	39.58	69.2	48.1			41.11
Bixiang 809	60mmol/L	A26	B2	3	12.8	21.27	61.27	45.85	25.81	42.37	48.09	41.25	258.41	24.2		56.67	33.26	70.63	34.95	72.67	30.14	33.33
Bixiang 809	120mmol/L	A26	B3	3	13.2	18.25	56.47	45.34	29.78	35.83	47.73	38.86	263.62	24.13		40	33.06	71.72	26.16	54.38	50.68	30
Bixiang 809	180mmol/L	A26	B4	3	8.1	17.16	41.08	25.1	28.07	34.43	48.95	41.37	258.58	24.25		36.67	39.7	71.9	18.61	38.69	54.79	16.67
Jinfengjie 607	CK	A27	B1	3	14.8	23.48	74.68	84.43	67.22	34.02	46.4	39.79	240.96	21.8		88.89	26.58	86.03	69.07			70
Jinfengjie 607	60mmol/L	A27	B2	3	13.5	20.25	49.11	52.02	57.38	39.84	48.55	40.91	245.53	21.05		83.33	62.06	80.96	59.21	85.72	6.25	62.22
Jinfengjie 607	120mmol/L	A27	B3	3	11.9	17.35	42.22	20.82	35.48	43.87	46.09	39.94	247.81	21.65		73.33	33.63	85.43	52.18	75.54	17.5	57.78
Jinfengjie 607	180mmol/L	A27	B4	3	8.7	16.16	39.86	17.55	39.17	42.98	49.25	40.76	240.14	21.17		62.22	61.63	80.4	43.15	62.47	30	45.56
Jinongyu 309	CK	A28	B1	3	11.6	23.55	83.54	91.62	34.12	36.72	51.5	43.04	232.42	25.03		88.89	38.16	77.61	65.79			64.44
Jinongyu 309	60mmol/L	A28	B2	3	12.9	22.5	56.27	47.63	40.52	40.04	51.5	41.83	232.01	24.14		82.22	29.16	80.32	58.98	89.66	7.5	61.11
Jinongyu 309	120mmol/L	A28	B3	3	15.5	20.46	46.68	43.97	23.16	37.85	51.21	41.97	224.05	24.98		76.67	28.4	80.11	52.69	80.08	13.75	54.44
Jinongyu 309	180mmol/L	A28	B4	3	10.3	17.26	30.14	33.38	13.2	31.39	52.8	41.21	225.69	24.1		51.11	72.66	83.43	39.44	59.96	42.5	40
Xinyu 81	CK	A29	B1	3	12.4	24.34	67.17	57.71	37.63	34.5	54.6	34.35	234.27	26.43		90	82.26	80.67	65.93			70
Xinyu 81	60mmol/L	A29	B2	3	15.5	23.33	55.33	22.21	56.24	39.46	54.46	34.8	230.7	25.15		85.56	31.28	85.81	60.65	91.99	4.94	65.56
Xinyu 81	120mmol/L	A29	B3	3	14.1	16.43	43.08	21.52	40.91	41.51	53.9	35.1	228.89	25.63		76.67	18.02	88.47	45.46	68.96	14.81	55.56
Xinyu 81	180mmol/L	A29	B4	3	17.3	15.62	37.2	13.05	47.18	40.86	54.06	34.93	228.42	25.53		73.33	23.17	81.44	42.04	63.76	18.52	47.78
Xinyu 24	CK	A30	B1	3	22.7	24.9	76.44	28.19	43.24	46.88	52.47	38.96	271.93	21.82		73.33	29.54	71.75	59.91			56.67
Xinyu 24	60mmol/L	A30	B2	3	18.3	22.98	54.7	26.39	49.88	44.39	50.12	39.46	255.65	21.34		67.78	27.9	69.22	51.76	86.4	7.58	50
Xinyu 24	120mmol/L	A30	B3	3	16.8	21.39	47.53	22.47	65.59	38.16	51.92	39.19	271.64	21.88		65.56	18.91	67.38	43.1	71.95	10.61	42.22
Xinyu 24	180mmol/L	A30	B4	3	12.7	20.53	36.51	15.03	35.15	42.5	53.43	38.84	257.93	21.5		58.89	27.91	73.19	31.57	52.7	19.7	30
Denghai 3672	CK	A31	B1	3	18.9	25.21	79.02	33.62	51.36	34.23	53.76	35.27	240.54	19.97		82.22	24.07	84.19	62.04			68.89
Denghai 3672	60mmol/L	A31	B2	3	16.4	23.1	67.11	22.11	34.04	39.43	52.62	35.53	242.53	20.95		68.89	36.44	80.76	45.88	73.96	16.22	51.11
Denghai 3672	120mmol/L	A31	B3	3	15.2	21.22	58.98	15.81	23.47	46.26	54.42	36.14	244.17	22.15		67.78	34.54	87.69	35.28	56.87	17.57	38.89
Denghai 3672	180mmol/L	A31	B4	3	15.7	18.87	35.97	12.62	27.29	44.08	51.51	36.69	240.95	21.19		41.11	20.46	83.34	23.52	37.91	50	26.67
Xinyu 66	CK	A32	B1	3	17.9	20.51	70.47	55.36	99.8	39.22	49.7	42.47	250.38	21.85		95.56	28.54	77.04	89.35			92.22
Xinyu 66	60mmol/L	A32	B2	3	16.2	19.44	57.3	24.84	164.33	42.98	49.62	42.5	253.72	21.78		91.11	22.28	79.73	74.35	83.21	4.65	76.67
Xinyu 66	120mmol/L	A32	B3	3	20.2	18.49	46.56	19.27	106.77	44.83	50.06	41.14	252.08	22.64		84.44	18.26	79.17	63.47	71.04	11.63	74.44
Xinyu 66	180mmol/L	A32	B4	3	12.9	17.68	35.92	13.87	114.61	41.55	50.98	41.79	255.24	23.59		80	18.97	83.47	59.63	66.74	16.28	70
Xinnong 008	CK	A33	B1	3	16.3	25.16	81.48	79.28	116.6	47.77	48.63	38.78	245.23	25.1		80	30.76	68.07	60.42			62.22
Xinnong 008	60mmol/L	A33	B2	3	18.4	23.17	37.29	49.83	107.44	43.46	50.7	38.73	243.88	25.89		77.78	46.61	70.52	52.64	87.13	2.78	56.67
Xinnong 008	120mmol/L	A33	B3	3	17	22.24	30.2	25.67	105.42	41.13	47.17	37.13	252.55	25.54		60	42.32	68.51	44.63	73.87	25	50
Xinnong 008	180mmol/L	A33	B4	3	13.4	21.39	29.12	18.37	112.82	41.85	48.15	36.94	241.19	24.63		32.22	44.43	78.62	25.56	42.3	59.72	26.67
Xianyu 335	CK	A34	B1	3	17	20.18	93.15	59.06	31.44	37.65	57.71	35.57	214.77	22.75		97.78	20.44	79.92	96.11			92.22
Xianyu 335	60mmol/L	A34	B2	3	14.2	19.37	37.8	41.04	25.89	40.42	58.05	37.03	231.23	24.08		95.56	36.72	81.46	91.76	95.47	2.27	90
Xianyu 335	120mmol/L	A34	B3	3	12	16.92	27.97	31.13	19.95	35.6	58.42	34.82	227.25	23.17		91.11	40.68	80.76	87.45	90.99	6.82	83.33
Xianyu 335	180mmol/L	A34	B4	3	9	15.6	25.01	17.91	22.79	38.47	56.28	35.75	228.59	22.95		83.33	37.67	88.08	75.65	78.71	14.77	73.33
Fengtian14	CK	A35	B1	3	11.5	23.74	94.57	102.32	31.93	41.55	53.64	33.94	266.84	20.28		37.78	35.28	80.63	26.99			22.22
Fengtian14	60mmol/L	A35	B2	3	9.9	20.91	42.56	23.83	31.84	37.75	52.9	35.17	250.91	21.11		27.78	48.71	82.09	19.68	72.9	24.24	17.78
Fengtian14	120mmol/L	A35	B3	3	9.9	17.8	39.38	20.17	31.82	34.06	55.11	35.39	262.21	20.15		20	41.45	65.45	11.57	42.88	45.45	8.89
Fengtian14	180mmol/L	A35	B4	3	9.4	16.07	25.57	19.13	18.35	39.08	51.94	35.5	261.04	20.83		15.56	29.11	80.79	8.94	33.1	57.58	6.67
Fuyu 109	CK	A36	B1	3	18.8	19.06	62.56	60.3	50.39	42.3	47.38	44.93	209.84	21.52		51.11	32.48	67.34	48.1			45.56
Fuyu 109	60mmol/L	A36	B2	3	22.5	17.78	43.68	41.9	65.75	44.76	48.42	43.33	217.1	21.77		45.56	38.95	82.77	38.24	79.5	10.87	34.44
Fuyu 109	120mmol/L	A36	B3	3	18	15.74	38.06	32.85	62.97	37.58	46.52	44.81	213	20.95		43.33	22.28	80.74	35.51	73.82	15.22	32.22
Fuyu 109	180mmol/L	A36	B4	3	14.3	15.03	24.81	21.36	60.96	41.14	46.46	44.92	211.28	21.98		40	24.6	81.04	28.94	60.15	21.74	26.67
Simon 3358	CK	A37	B1	3	11.2	23.19	64.44	49.94	38.56	36.45	55.59	36.22	269.59	24.66		76.67	21.97	94.2	65			57.78
Simon 3358	60mmol/L	A37	B2	3	9.9	22.24	52.85	40.86	28.67	39.7	56.61	37.31	265.96	23.6		74.44	27.72	76.58	59.91	92.17	2.9	53.33
Simon 3358	120mmol/L	A37	B3	3	8.9	19.87	37.26	24.94	28.15	40.86	57.28	36.79	253.97	24.22		38.89	34.55	82.16	31.71	48.79	49.28	30
Simon 3358	180mmol/L	A37	B4	3	11.5	17.16	31.65	17.64	26.85	43.53	55.86	38.17	260.94	23.15		21.11	35.36	83.21	13.66	21.01	72.46	13.33
Jixing218	CK	A38	B1	3	17.3	23.07	84.49	65.14	51.86	28.18	55.46	43.97	235.01	19.96		30	29.33	75.3	24.03			23.33
Jixing218	60mmol/L	A38	B2	3	18.3	21.34	57.03	38.3	48.46	32.96	54.88	41.3	237.61	21.2		16.67	27.95	79.16	13.47	56.07	44.44	13.33
Jixing218	120mmol/L	A38	B3	3	13.3	20.06	35.98	19.33	43.39	32.79	55.41	43.25	237.15	20.75		13.33	24.82	79.83	7.5	31.21	55.56	6.67
Jixing218	180mmol/L	A38	B4	3	13.4	18.56	24.61	18.43	57.55	32.04	54.49	42.59	234.27	21.95		8.89	34.07	81.35	5.05	21	70.37	4.44
Sanmeng 9599	CK	A39	B1	3	10	23.9	75.32	80.97	26.82	38.54	49.72	44.46	231.62	27.36		91.11	40.13	81.14	72.92			65.56
Sanmeng 9599	60mmol/L	A39	B2	3	12.4	22.22	42.67	21.09	48.16	41.31	51.81	41.95	233.75	25.7		72.22	46.18	79.73	60.23	82.6	20.73	55.56
Sanmeng 9599	120mmol/L	A39	B3	3	13.5	19.99	26.02	8.38	23.27	46.33	48.59	42.04	239.51	26.87		57.78	22.44	82.06	45.37	62.22	36.59	38.89
Sanmeng 9599	180mmol/L	A39	B4	3	8.8	15.67	24.22	7.15	31.12	40.9	50.1	44.17	237.95	26.31		34.44	48.56	86.19	26.85	36.83	62.2	22.22
Simon 208	CK	A40	B1	3	15.8	21.91	63.82	80.83	70.23	40.69	48.29	34.2	222.34	25.9		85.56	32.27	75.35	69.07			77.78
Simon 208	60mmol/L	A40	B2	3	18.9	18.75	54.84	53.34	30.43	42.23	49.39	35.73	223.03	26.17		74.44	43.94	83.35	52.36	75.8	12.99	61.11
Simon 208	120mmol/L	A40	B3	3	11.6	15.29	42.84	20.3	44.93	42.98	49.66	34.67	221.3	25.26		73.33	44.1	88.07	44.86	64.95	14.29	52.22
Simon 208	180mmol/L	A40	B4	3	9.3	14.05	39.22	18.47	24.37	32.62	48.34	35.59	226.43	26.53		68.89	33.6	87.69	31.48	45.58	19.48	34.44
Huxin 338	CK	A41	B1	3	14.8	23.5	79.38	51.95	23.79	42.84	55.44	36.37	245.44	19.69		88.89	32.44	72.37	74.58			72.22
Huxin 338	60mmol/L	A41	B2	3	18	20.13	63.28	18.44	34.57	36.11	55.81	36.39	239.11	20.21		84.44	24.62	88.56	61.81	82.87	5	61.11
Huxin 338	120mmol/L	A41	B3	3	16.8	19.27	36.13	4.59	24.92	44.08	55.67	36.69	244.29	21.97		73.33	40.59	84.36	42.31	56.73	17.5	36.67
Huxin 338	180mmol/L	A41	B4	3	17.8	17.66	25.76	4.32	36.38	35.08	54.08	36.74	245.9	20.58		56.67	39.81	80.48	32.59	43.7	36.25	27.78

## Sheet: ANOVA results
plant hight	15.18	3.56	c	15.55	3.22	d	14.39	3.09	b	11.86	3.04	a
steam diameter	23.08	1.82	d	21.02	1.69	c	18.79	1.83	b	17.09	1.92	a
Germ length	73.74	13.39	d	53.61	11.71	c	44.25	12.77	b	33.98	10.38	a
radicle length	66.5	22.89	d	36.99	12.25	c	24.22	10.03	b	15.57	6.78	a
Leaf are	56.65	27.83	d	52.03	25.43	c	43.95	20.28	b	40.64	21.6	a
MDA	52.22	3.69	a	52.03	3	a	52.52	3.39	b	52.28	3.2	a
SOD	40.01	4.06	b	39.92	3.41	b	39.69	3.43	a	39.91	3.39	b
POD	235.05	19.06	a	236.39	15.34	b	235.65	16.45	ab	235.44	16.01	ab
PRO	22.82	2.18	a	22.75	1.76	a	22.73	1.77	a	22.8	1.72	a
chlorophyll spad	39.05	3.97	a	39.9	3.37	b	39.01	4.45	a	39.16	4.23	a
Germination rate	74.86	20.32	d	63.95	22.93	c	54.8	22.82	b	44.06	23.8	a
Root-crown ratio	32.46	10.14	a	32.82	9.11	b	32.31	9.15	a	35.63	12.63	c
water content	74.43	7.35	a	74.56	6.54	a	75.73	7.48	b	78.49	5.33	c
Germination index	59.51	18.15	d	48.56	19.58	c	39.22	19.01	b	29.51	18.69	a
salt tolerance inedx				79.15	12.9	c	62.69	15.38	b	45.89	17.2	a
salt injure index				16.62	12.57	a	29.35	16.48	b	44.07	20.16	c
Germination potential	59.1	19.31	d	48.76	20.97	c	39.91	20.69	b	29.4	19.61	a

## Sheet: Principal component analysis re
Rotated component matrixa										Total variance explained
	Components									Components	Initial eigenvalues			Extracted loadings sum of squares			Rotated loadings sum of squares
	1	2	3	4	5	6					Total	Percentage of variance	Cumulative %	Total	Percentage of variance	Cumulative %	Total	Percentage of variance	Cumulative %
Plant hight	-0.07	-0.087	0.747	0.122	0.056	-0.176				1	5.173	28.738	28.738	5.173	28.738	28.738	4.873	27.072	27.072
Stem thickness	-0.298	-0.195	0.348	0.466	0.241	0.171				2	2.437	13.536	42.274	2.437	13.536	42.274	1.972	10.954	38.026
Leaf area	0.109	0.282	0.573	0.012	0.429	0.02				3	1.85	10.28	52.555	1.85	10.28	52.555	1.807	10.037	48.063
Water content	0.444	-0.165	-0.459	-0.256	-0.044	-0.249				4	1.413	7.85	60.405	1.413	7.85	60.405	1.643	9.126	57.189
Root-crown ratio	-0.165	0.407	-0.638	0.12	0.022	0.198				5	1.17	6.502	66.907	1.17	6.502	66.907	1.569	8.715	65.904
Germ length	-0.078	-0.091	0.11	0.864	-0.012	-0.02				6	1.134	6.301	73.208	1.134	6.301	73.208	1.315	7.304	73.208
Radicle length	-0.058	0.548	-0.171	0.669	-0.173	-0.06				7	0.95	5.276	78.484
MDA（nmol/mg)	-0.081	-0.792	0.079	-0.128	-0.206	0.146				8	0.726	4.034	82.518
SOD（U/g)	-0.247	0.635	0.254	-0.138	-0.258	0.233				9	0.702	3.902	86.42
POD（mU/mg)	0.189	-0.449	0.103	0.102	0.062	-0.099				10	0.671	3.726	90.147
PRO	0.084	0.031	-0.181	0.035	0.074	0.858				11	0.534	2.964	93.111
Chlorophyll SPAD	0.11	0.028	0.108	-0.143	0.826	0.245				12	0.403	2.236	95.347
Germination potential	0.957	-0.1	-0.034	-0.087	0.085	0.059				13	0.355	1.975	97.322
Germination rate	0.927	-0.213	-0.017	-0.096	0.085	0.113				14	0.306	1.698	99.019
Germination index	0.948	-0.126	-0.006	-0.138	0.015	0.097				15	0.117	0.652	99.671
Salt tolerance index	0.938	0.086	-0.025	0.007	-0.055	-0.016				16	0.035	0.196	99.867
Salt injure index	-0.925	0.05	-0.06	-0.009	-0.083	0.129				17	0.018	0.102	99.969
Relative conductivity	0.023	0.176	-0.088	-0.183	-0.683	0.473				18	0.006	0.031	100

## Sheet: Data analysed by the affiliatio
Varieties	Treatments	Repeat	Germination potential	SOD（U/g)	Plant hight	Germ length	Chlorophyll SPAD	PRO（ng/g)
A1	B1	1	61.11	48.49	12.8	60.28	39.53	25.02
A1	B2	1	45.56	47.44	11.8	55.48	39.1	23.68
A1	B3	1	30	45	11	48.12	28	24.61
A1	B4	1	25.56	45.52	10.6	34.81	41.8	25.35
A2	B1	1	43.33	42.73	16.6	72.84	43.47	23.67
A2	B2	1	20	42.52	17	61.37	47.63	22.43
A2	B3	1	16.67	40.81	15.3	48.9	44.17	22.42
A2	B4	1	14.44	40.74	10.9	46.5	42.83	23.74
A3	B1	1	35.56	39.25	13.6	74.01	30.9	19.44
A3	B2	1	28.89	42.54	15.4	64.97	42.03	19.53
A3	B3	1	23.33	39.2	11.6	64.76	29.83	19.89
A3	B4	1	13.33	39.76	8	48.77	40.13	19.87
A4	B1	1	40	41.9	10.9	71.32	38.93	23.04
A4	B2	1	32.22	40.25	10.5	64.82	37.83	21.98
A4	B3	1	24.44	40.49	13	55.9	40.07	23.68
A4	B4	1	13.33	40.84	14.2	53.53	38.3	22.27
A5	B1	1	62.22	49.32	18.4	68.84	36.77	22.18
A5	B2	1	57.78	46.93	21.3	42.19	32.83	22.31
A5	B3	1	51.11	48.06	21.5	30.12	37.17	22.71
A5	B4	1	30	45.68	18	20.55	41.07	21.65
A6	B1	1	61.11	35.65	12.5	67.7	40.57	22.04
A6	B2	1	41.11	35.77	12	43.18	45.07	23.44
A6	B3	1	32.22	36.24	14.1	41.46	42.3	21.85
A6	B4	1	24.44	35.86	12	34.95	46.8	22.02
A7	B1	1	35.56	37.36	23.8	89.57	35.3	24.28
A7	B2	1	23.33	37.13	20.7	70.58	39.57	24.57
A7	B3	1	14.44	39.14	21.6	66.31	39.73	23.37
A7	B4	1	6.67	37.16	18.3	54.13	37.7	24.42
A8	B1	1	53.33	45.86	10.7	38.92	43	21.26
A8	B2	1	35.56	44.83	13.3	35.61	39.73	22.72
A8	B3	1	23.33	44.53	12.5	11.75	40.37	20.74
A8	B4	1	14.44	44.91	7.7	8.05	40.83	20.68
A9	B1	1	36.67	45.52	15.1	87.04	36.1	23.08
A9	B2	1	22.22	42.96	16.7	72.29	34.13	21.75
A9	B3	1	12.22	42.22	14.2	63.41	36.53	22.85
A9	B4	1	7.78	43.37	12.2	34.61	38.1	22.92
A10	B1	1	51.11	42.24	13	86.91	43	24.49
A10	B2	1	43.33	40.53	14.8	67.81	37.67	23.73
A10	B3	1	24.44	43.57	13.8	36.87	39.63	24.22
A10	B4	1	15.56	41.91	9.5	23.98	37.2	24.01
A11	B1	1	91.11	35.03	15.1	73.32	40.1	20.77
A11	B2	1	80	35.51	19.7	62.48	43.33	21.93
A11	B3	1	67.78	37.6	15.7	51.46	28.73	21.49
A11	B4	1	55.56	38.23	11.6	37.44	45.9	21.69
A12	B1	1	76.67	36.21	14.7	73.22	38.47	25.97
A12	B2	1	73.33	36.3	18.8	60.21	39.73	24.47
A12	B3	1	71.11	38.35	19	57.97	40.83	25.46
A12	B4	1	64.44	36.56	12.7	31.62	49.73	24.76
A13	B1	1	63.33	34.86	20.9	34.04	44.2	19.45
A13	B2	1	58.89	36.28	16.5	30.15	37.03	19.62
A13	B3	1	44.44	36.62	15.6	28.87	39.8	20.13
A13	B4	1	28.89	37.12	8.8	23.02	37.97	20.91
A14	B1	1	46.67	36.61	18.2	78.23	40.8	20.45
A14	B2	1	42.22	36.18	15.7	52.62	36.23	20.89
A14	B3	1	23.33	37.73	15.3	49.8	37.5	20.89
A14	B4	1	15.56	39.65	11	36.13	34.07	20.39
A15	B1	1	71.11	45.06	17	77.53	38.97	20.33
A15	B2	1	67.78	42.25	15.1	41.33	39.73	20.87
A15	B3	1	38.89	44.18	13.8	40.2	44.7	20.9
A15	B4	1	28.89	44.82	12.2	36.7	39.63	22.4
A16	B1	1	34.44	44.41	17.6	82.19	36.1	25.43
A16	B2	1	26.67	41.75	17.7	73.69	40.47	23.76
A16	B3	1	21.11	42.91	13.3	45.58	39.4	25.1
A16	B4	1	16.67	44.48	15	36.97	39.83	24.53
A17	B1	1	18.89	40.4	20.5	87.13	44.07	18.49
A17	B2	1	12.22	38.88	20.8	70.44	40.07	18.69
A17	B3	1	11.11	41.31	17.3	69.22	38.4	19.34
A17	B4	1	5.56	39.79	9.4	55.39	30.53	21.15
A18	B1	1	64.44	43.32	10.1	73.69	41.23	26.43
A18	B2	1	43.33	44.1	13	52.43	44.77	25.58
A18	B3	1	42.22	41.66	10.2	49.33	42.8	24.17
A18	B4	1	26.67	42.05	10.1	26.12	40.87	24.12
A19	B1	1	73.33	45.35	13.6	90.53	38.6	22.94
A19	B2	1	56.67	43.91	13.5	43.14	38.87	23.48
A19	B3	1	54.44	43.9	10.4	38.87	37.47	21.92
A19	B4	1	32.22	42.8	8.1	29.32	38.03	21.63
A20	B1	1	36.67	39.77	15.7	40.34	36.6	22.16
A20	B2	1	11.11	39.65	16.9	35.97	35.73	23.15
A20	B3	1	10	40.07	17.9	29.18	37.67	21.5
A20	B4	1	8.89	38.18	13.2	28.21	39.03	23.41
A21	B1	1	73.33	43.45	11	84.02	40	23.4
A21	B2	1	67.78	42.92	12.6	72.7	45.53	22.34
A21	B3	1	56.67	40.23	13.1	71.04	47	23.28
A21	B4	1	27.78	40.13	13.7	60.79	36.37	22.45
A22	B1	1	68.89	35.29	19.5	75.94	42.77	24.63
A22	B2	1	54.44	36.48	16.5	61.47	42.17	25.33
A22	B3	1	43.33	35.34	15.4	47.38	39.03	23.02
A22	B4	1	33.33	36.12	14.6	30.65	39.53	25.05
A23	B1	1	95.56	33.42	13.4	90.86	38.93	20.83
A23	B2	1	88.89	36.36	11.2	47.35	40.23	21.7
A23	B3	1	86.67	33.6	10.8	41.78	35.93	20.42
A23	B4	1	83.33	36.1	7	31.35	39.73	21.16
A24	B1	1	78.89	43.22	9.4	77.21	40.07	22.54
A24	B2	1	76.67	42.61	13	44.61	37.6	23.94
A24	B3	1	74.44	40.17	11.3	33.22	35.9	22.94
A24	B4	1	67.78	39.82	10.8	30.61	33.33	24.1
A25	B1	1	61.11	36.29	18	65.33	40.7	23.02
A25	B2	1	40	36.98	18.5	49.64	40.73	22.89
A25	B3	1	34.44	35.18	17.7	46.18	42.07	23.65
A25	B4	1	17.78	37.85	16.9	38.98	42.43	22.38
A26	B1	1	38.89	41.75	12.7	67.98	38.07	24.91
A26	B2	1	36.67	40.47	12.5	59.74	41.3	25.04
A26	B3	1	34.44	38.78	12.9	55.07	34.93	24.41
A26	B4	1	18.89	41.64	7.9	40.05	33.57	23.15
A27	B1	1	70	41.13	14.4	72.83	33.17	21.39
A27	B2	1	64.44	41.77	13.2	47.9	38.83	21.17
A27	B3	1	61.11	39.6	11.6	41.16	42.77	20.89
A27	B4	1	47.78	41.92	8.5	38.86	41.9	20.6
A28	B1	1	65.56	43.01	11.3	81.43	35.8	25.92
A28	B2	1	63.33	42.14	12.6	54.85	39.03	23.95
A28	B3	1	56.67	42.27	15.1	45.5	36.9	24.08
A28	B4	1	41.11	41.44	10.1	29.38	30.6	24.41
A29	B1	1	67.78	32.78	12.1	65.49	33.63	27.33
A29	B2	1	66.67	33.51	15.1	53.94	38.47	25.06
A29	B3	1	53.33	32.88	13.7	41.99	40.47	26.61
A29	B4	1	48.89	32.83	16.9	36.26	39.83	26.54
A30	B1	1	54.44	38.08	22.1	74.52	45.7	20.75
A30	B2	1	42.22	39.3	17.8	53.32	43.27	22.39
A30	B3	1	46.67	38.29	16.4	46.33	37.2	22.99
A30	B4	1	33.33	36.64	12.4	35.59	41.43	21.42
A31	B1	1	67.78	35.62	18.4	77.03	33.37	20.11
A31	B2	1	51.11	35.88	16	65.42	38.43	21.11
A31	B3	1	38.89	35.64	14.9	57.49	45.1	22.06
A31	B4	1	28.89	34.7	15.3	35.06	42.97	20.33
A32	B1	1	93.33	42.51	17.5	68.69	38.23	21.89
A32	B2	1	72.22	41.6	15.8	55.86	41.9	22.09
A32	B3	1	73.33	41.8	19.7	45.39	43.7	21.16
A32	B4	1	71.11	42.45	12.6	35.01	40.5	23.63
A33	B1	1	63.33	37.8	15.9	79.41	46.57	26.19
A33	B2	1	57.78	37.18	18	36.35	42.37	25.15
A33	B3	1	51.11	37.22	16.6	29.45	40.1	24.39
A33	B4	1	27.78	36.37	13.1	28.38	40.8	25.22
A34	B1	1	96.67	33.88	16.5	90.79	36.7	23.09
A34	B2	1	95.56	35.82	13.9	36.85	39.4	23.77
A34	B3	1	90	35.74	11.7	27.26	34.7	22.68
A34	B4	1	74.44	33.73	8.8	24.38	37.5	21.67
A35	B1	1	22.22	33.64	11.3	92.2	40.5	19.67
A35	B2	1	17.78	32.96	9.7	41.49	36.8	22.27
A35	B3	1	10	34.8	9.7	38.38	33.2	20.89
A35	B4	1	7.78	33.96	9.2	24.93	38.1	21.19
A36	B1	1	42.22	45.68	18.3	60.97	41.23	20.43
A36	B2	1	35.56	44.94	21.9	42.57	43.63	22.14
A36	B3	1	34.44	45.24	17.5	37.1	36.63	20.26
A36	B4	1	27.78	45.27	13.9	24.18	40.1	21.18
A37	B1	1	56.67	36.5	10.9	62.82	35.53	23.97
A37	B2	1	54.44	39.45	9.7	51.53	38.7	24.76
A37	B3	1	31.11	36.99	8.7	36.32	39.83	24.16
A37	B4	1	13.33	39.34	11.2	30.86	42.43	22.59
A38	B1	1	21.11	44.39	16.9	82.37	27.47	19.67
A38	B2	1	12.22	41.05	17.9	55.62	32.13	20.72
A38	B3	1	7.78	41.41	13	35.07	31.97	21.36
A38	B4	1	5.56	41.96	13	23.99	31.23	21.7
A39	B1	1	62.22	44.7	9.7	73.41	37.57	27.38
A39	B2	1	56.67	43.04	12.1	41.59	40.27	25.49
A39	B3	1	41.11	42.66	13.2	25.36	45.17	26.25
A39	B4	1	23.33	44.07	8.6	23.62	39.87	25.62
A40	B1	1	78.89	34.09	15.4	62.21	39.67	26.99
A40	B2	1	63.33	37.03	18.4	53.46	41.17	25.78
A40	B3	1	53.33	35.07	11.3	41.77	41.9	25.28
A40	B4	1	36.67	37.68	9.1	38.23	31.8	26.19
A41	B1	1	68.89	35.05	14.4	77.37	41.77	19.72
A41	B2	1	60	37.85	17.5	61.69	35.2	19.79
A41	B3	1	37.78	34.94	16.4	35.22	42.97	21.77
A41	B4	1	26.67	36.11	17.4	25.11	34.2	19.59
A1	B1	2	62.22	47.76	12.6	59.51	39.02	23.97
A1	B2	2	47.78	48.18	11.6	54.77	38.59	23.48
A1	B3	2	32.22	45.72	10.9	47.51	27.64	23.8
A1	B4	2	24.44	47.07	10.5	34.37	41.26	24.44
A2	B1	2	44.44	41.41	16.3	71.92	42.9	22.85
A2	B2	2	17.78	43.75	16.7	60.59	47.02	22.51
A2	B3	2	17.78	42.67	15.1	48.28	43.6	22.29
A2	B4	2	16.67	43.28	10.8	45.92	42.28	24.11
A3	B1	2	36.67	39.19	13.4	73.08	30.5	19.94
A3	B2	2	27.78	42.04	15.2	64.15	41.49	20.9
A3	B3	2	24.44	38.66	11.5	63.94	29.45	20.87
A3	B4	2	12.22	40.59	7.9	48.16	39.61	20.88
A4	B1	2	41.11	43.09	10.7	70.44	38.43	23.59
A4	B2	2	31.11	41.24	10.4	63.98	37.34	22.52
A4	B3	2	23.33	40.58	12.8	55.19	39.55	23.43
A4	B4	2	14.44	41.41	14	52.86	37.81	21.98
A5	B1	2	64.44	49.26	18.1	67.97	36.29	22.24
A5	B2	2	60	46.14	21	41.66	32.41	22.08
A5	B3	2	50	47.05	21.2	29.76	36.69	22.42
A5	B4	2	28.89	46.72	17.7	20.29	40.54	22.12
A6	B1	2	60	36.31	12.3	66.84	40.04	22.34
A6	B2	2	40	35.87	11.8	42.64	44.48	22.39
A6	B3	2	33.33	38.29	13.9	40.93	41.75	22.8
A6	B4	2	25.56	36.48	11.8	34.51	46.2	21.68
A7	B1	2	38.89	38.53	23.5	88.45	34.84	24.69
A7	B2	2	24.44	38.01	20.4	69.7	39.06	24.23
A7	B3	2	15.56	38.72	21.3	65.47	39.22	23.54
A7	B4	2	7.78	36.76	18	53.46	37.21	23.68
A8	B1	2	51.11	44.43	10.5	38.42	42.45	20.98
A8	B2	2	36.67	44.32	13.1	35.16	39.22	22.34
A8	B3	2	24.44	44.59	12.3	11.6	39.85	21.54
A8	B4	2	15.56	43.94	7.6	7.95	40.31	20.79
A9	B1	2	37.78	44.07	14.9	85.93	35.63	23.48
A9	B2	2	21.11	43.5	16.5	71.37	33.69	21.99
A9	B3	2	11.11	42.44	14	62.6	36.06	22.43
A9	B4	2	8.89	42.4	12.1	34.17	37.61	23.7
A10	B1	2	53.33	41.83	12.8	85.81	42.45	24.63
A10	B2	2	44.44	40.37	14.6	66.95	37.18	23.58
A10	B3	2	26.67	41.58	13.6	36.39	39.12	23.73
A10	B4	2	16.67	41.78	9.4	23.68	36.72	23.82
A11	B1	2	88.89	37.3	14.9	72.39	39.58	20.91
A11	B2	2	81.11	35.75	19.5	61.69	42.77	22.28
A11	B3	2	68.89	37.64	15.4	50.81	28.36	21.82
A11	B4	2	56.67	36.36	11.4	36.97	45.31	22.22
A12	B1	2	77.78	38.48	14.5	72.28	37.97	24.69
A12	B2	2	74.44	36.37	18.5	59.45	39.22	24.06
A12	B3	2	72.22	38.39	18.8	57.23	40.3	25.57
A12	B4	2	62.22	37.61	12.5	31.22	49.09	24.38
A13	B1	2	64.44	35.96	20.6	33.6	43.63	20.55
A13	B2	2	57.78	37.18	16.3	29.77	36.55	19.21
A13	B3	2	45.56	36.03	15.4	28.5	39.29	19.73
A13	B4	2	30	37.86	8.6	22.72	37.48	19.89
A14	B1	2	50	36.57	18	77.23	40.27	21.69
A14	B2	2	43.33	38.24	15.5	51.96	35.76	21.02
A14	B3	2	24.44	39.06	15.1	49.16	37.01	20.88
A14	B4	2	16.67	38.39	10.8	35.67	33.63	21.46
A15	B1	2	72.22	42.95	16.8	76.54	38.46	20.65
A15	B2	2	68.89	42.89	14.9	40.8	39.22	20.28
A15	B3	2	38.89	43.9	13.6	39.69	44.12	21.17
A15	B4	2	28.89	43.21	12.1	36.23	39.12	21.61
A16	B1	2	35.56	42.99	17.4	81.15	35.63	24.69
A16	B2	2	26.67	43.56	17.5	72.75	39.94	23.39
A16	B3	2	21.11	43.63	13.1	44.99	38.89	24.29
A16	B4	2	17.78	42.33	14.8	36.5	39.32	25.18
A17	B1	2	18.89	39.37	20.2	86.03	43.5	18.95
A17	B2	2	11.11	39.98	20.5	69.54	39.55	19.35
A17	B3	2	10	41.87	17.1	68.34	37.9	19.25
A17	B4	2	6.67	41.1	9.2	54.68	30.14	20.89
A18	B1	2	63.33	41.79	10	72.75	40.7	25.95
A18	B2	2	42.22	41.87	12.8	51.77	44.19	25.79
A18	B3	2	37.78	41.16	10.1	48.7	42.25	24.75
A18	B4	2	26.67	43.13	9.9	25.81	40.34	25.34
A19	B1	2	74.44	44.7	13.4	89.37	38.1	22.17
A19	B2	2	57.78	42.78	13.3	42.59	38.36	23.62
A19	B3	2	53.33	43.3	10.3	38.39	36.98	22.19
A19	B4	2	33.33	42.58	8	28.96	37.54	21.72
A20	B1	2	36.67	39.18	15.5	39.83	36.13	22.89
A20	B2	2	11.11	40.63	16.6	35.52	35.27	22.83
A20	B3	2	10	39.13	17.7	28.81	37.18	21.83
A20	B4	2	8.89	39.71	13	27.86	38.53	22.1
A21	B1	2	74.44	43.26	10.8	82.95	39.48	22.53
A21	B2	2	68.89	42.52	12.4	71.78	44.95	22.74
A21	B3	2	54.44	41.88	12.9	70.14	46.39	24.05
A21	B4	2	25.56	42	13.5	60.01	35.9	22.25
A22	B1	2	70	35.19	19.2	74.98	42.21	24.34
A22	B2	2	55.56	37.45	16.3	60.68	41.62	23.95
A22	B3	2	44.44	35.53	15.2	46.77	38.53	24.22
A22	B4	2	36.67	36.87	14.4	30.26	39.02	24.48
A23	B1	2	92.22	33.3	13.2	89.7	38.43	21.87
A23	B2	2	88.89	35.03	11.1	46.75	39.71	22.09
A23	B3	2	85.56	33.98	10.7	41.25	35.47	21.88
A23	B4	2	82.22	36.08	6.9	30.95	39.22	22.19
A24	B1	2	80	42.02	9.3	76.24	39.55	21.95
A24	B2	2	75.56	41.3	12.9	44.04	37.11	23.02
A24	B3	2	72.22	40.63	11.2	32.8	35.44	22.27
A24	B4	2	66.67	41.73	10.7	30.22	32.9	22.93
A25	B1	2	60	37.88	17.8	64.49	40.17	23.38
A25	B2	2	38.89	36.98	18.3	49	40.21	22.59
A25	B3	2	35.56	37.2	17.5	45.59	41.52	23.1
A25	B4	2	15.56	36.84	16.7	38.48	41.89	22.65
A26	B1	2	40	40.02	12.5	67.11	37.58	25.17
A26	B2	2	35.56	40.84	12.3	58.97	40.77	24.86
A26	B3	2	31.11	41.04	12.7	54.38	34.48	24.37
A26	B4	2	17.78	41.72	7.8	39.54	33.13	23.96
A27	B1	2	72.22	41.98	14.2	71.9	32.74	21.31
A27	B2	2	63.33	41.51	13	47.29	38.33	22.16
A27	B3	2	58.89	39.13	11.4	40.62	42.21	21
A27	B4	2	46.67	42.28	8.4	38.36	41.36	22.01
A28	B1	2	64.44	42.45	11.2	80.37	35.34	25.72
A28	B2	2	62.22	42.76	12.5	54.13	38.53	25.34
A28	B3	2	55.56	40.91	14.9	44.91	36.42	23.98
A28	B4	2	40	40.73	9.9	28.99	30.2	25.09
A29	B1	2	70	34.3	11.9	64.64	33.2	25.83
A29	B2	2	65.56	35.02	14.9	53.24	37.97	24.82
A29	B3	2	54.44	33.37	13.5	41.45	39.94	26.7
A29	B4	2	46.67	34.29	16.6	35.79	39.32	26.07
A30	B1	2	57.78	38.48	21.8	73.56	45.11	20.41
A30	B2	2	47.78	38.2	17.6	52.64	42.71	21.32
A30	B3	2	43.33	38.65	16.1	45.73	36.72	22.81
A30	B4	2	32.22	37.56	12.2	35.13	40.9	21.83
A31	B1	2	70	37.71	18.1	76.04	32.94	20.07
A31	B2	2	52.22	35.71	15.8	64.57	37.94	21.12
A31	B3	2	40	36.17	14.7	56.75	44.52	21.11
A31	B4	2	27.78	34.79	15.1	34.61	42.41	21.06
A32	B1	2	92.22	41.8	17.2	67.8	37.74	21.93
A32	B2	2	75.56	42.03	15.6	55.14	41.36	21.59
A32	B3	2	73.33	41.53	19.5	44.8	43.14	21.75
A32	B4	2	70	42.15	12.4	34.56	39.98	22.03
A33	B1	2	62.22	37.85	15.6	78.38	45.97	26.29
A33	B2	2	56.67	38.73	17.8	35.88	41.82	25.33
A33	B3	2	48.89	37.66	16.4	29.08	39.58	24.76
A33	B4	2	26.67	37.34	12.9	28.01	40.27	25.47
A34	B1	2	93.33	36.25	16.3	89.61	36.23	23.54
A34	B2	2	88.89	36.17	13.7	36.37	38.89	23.01
A34	B3	2	82.22	36.78	11.5	26.91	34.25	22.11
A34	B4	2	73.33	34.05	8.7	24.07	37.02	22.75
A35	B1	2	23.33	33.92	11.1	91.01	39.98	20.97
A35	B2	2	18.89	34.47	9.5	40.96	36.33	20.67
A35	B3	2	8.89	33.96	9.5	37.88	32.77	21.34
A35	B4	2	6.67	35.68	9	24.6	37.61	20.46
A36	B1	2	44.44	45.41	18.1	60.18	40.7	21.69
A36	B2	2	36.67	43.22	21.6	42.02	43.07	21.58
A36	B3	2	32.22	43.17	17.3	36.62	36.16	21.03
A36	B4	2	26.67	44.91	13.8	23.87	39.58	21.86
A37	B1	2	58.89	37.24	10.8	62.01	35.07	23.31
A37	B2	2	55.56	37.85	9.5	50.86	38.2	24.39
A37	B3	2	32.22	36.84	8.6	35.86	39.32	23.19
A37	B4	2	12.22	38.4	11	30.46	41.89	23.83
A38	B1	2	22.22	43.07	16.7	81.31	27.11	20.57
A38	B2	2	12.22	42.03	17.6	54.91	31.72	20.17
A38	B3	2	7.78	42.53	12.8	34.62	31.55	21.06
A38	B4	2	5.56	42.61	12.9	23.68	30.83	21.74
A39	B1	2	63.33	43.51	9.6	72.46	37.08	27.23
A39	B2	2	57.78	43.4	12	41.05	39.75	25.74
A39	B3	2	40	43.17	13	25.03	44.58	25.87
A39	B4	2	22.22	43.72	8.5	23.32	39.35	25.26
A40	B1	2	77.78	35.77	15.2	61.41	39.15	26.44
A40	B2	2	61.11	37.08	18.2	52.77	40.64	26.52
A40	B3	2	50	35.18	11.2	41.23	41.36	26.19
A40	B4	2	33.33	37.34	9	37.74	31.39	25.51
A41	B1	2	72.22	36.55	14.2	76.37	41.23	20.03
A41	B2	2	60	38.43	17.3	60.89	34.75	20.24
A41	B3	2	35.56	35.08	16.1	34.76	42.41	20.56
A41	B4	2	26.67	36.57	17.2	24.78	33.76	20.35
A1	B1	3	60	47.18	13.1	61.81	40.55	24.77
A1	B2	3	46.67	46.33	12.1	56.9	40.12	23.6
A1	B3	3	31.11	45.11	11.3	49.32	28.73	24.4
A1	B4	3	24.44	46.73	10.9	35.67	42.88	24.85
A2	B1	3	44.44	41.83	17	74.69	44.59	23.74
A2	B2	3	21.11	42.49	17.4	62.92	48.87	22.54
A2	B3	3	18.89	42.68	15.7	50.16	45.31	22.41
A2	B4	3	15.56	42.24	11.2	47.68	43.94	23.31
A3	B1	3	36.67	40.69	13.9	75.88	31.7	20.96
A3	B2	3	27.78	41.15	15.8	66.63	43.12	21.03
A3	B3	3	25.56	40.33	11.9	66.41	30.6	19.67
A3	B4	3	12.22	41.51	8.2	49.99	41.17	20.09
A4	B1	3	43.33	42.71	11.1	73.08	39.94	22.73
A4	B2	3	30	42.12	10.8	66.49	38.81	22.72
A4	B3	3	25.56	42.17	13.4	57.31	41.1	22.83
A4	B4	3	15.56	41.06	14.5	54.86	39.29	22.64
A5	B1	3	65.56	46.6	18.8	70.59	37.72	22.22
A5	B2	3	58.89	46.54	21.8	43.27	33.68	21.69
A5	B3	3	50	46.34	22	30.85	38.13	22.92
A5	B4	3	31.11	45.53	18.4	21.08	42.13	21.67
A6	B1	3	58.89	35.59	12.8	69.42	41.61	22.5
A6	B2	3	42.22	35.44	12.3	44.28	46.23	23.21
A6	B3	3	34.44	36.77	14.4	42.5	43.39	21.94
A6	B4	3	24.44	38.02	12.3	35.84	48.01	22.82
A7	B1	3	40	37.16	24.4	91.79	36.21	24.46
A7	B2	3	25.56	36.96	21.2	72.35	40.59	23.54
A7	B3	3	15.56	38.44	22.1	67.99	40.76	23.82
A7	B4	3	7.78	37.8	18.7	55.48	38.67	23.55
A8	B1	3	55.56	43.73	10.9	39.91	44.11	21.58
A8	B2	3	34.44	44.12	13.6	36.53	40.76	21.96
A8	B3	3	25.56	44.66	12.8	12.05	41.41	20.71
A8	B4	3	16.67	44.23	7.9	8.26	41.89	21.96
A9	B1	3	38.89	43.69	15.5	89.26	37.03	22.58
A9	B2	3	22.22	43.19	17.2	74.13	35.02	22.19
A9	B3	3	12.22	42.43	14.6	65.02	37.48	23.29
A9	B4	3	8.89	44.39	12.5	35.51	39.09	23.27
A10	B1	3	52.22	41.27	13.3	89.12	44.11	23.59
A10	B2	3	43.33	41.5	15.1	69.53	38.64	24.41
A10	B3	3	25.56	43.15	14.1	37.82	40.66	23.89
A10	B4	3	15.56	40.77	9.8	24.59	38.16	24.54
A11	B1	3	88.89	35.23	15.5	75.19	41.14	21.75
A11	B2	3	82.22	37.04	20.2	64.07	44.46	21.26
A11	B3	3	66.67	38.27	16.1	52.74	29.48	22.22
A11	B4	3	55.56	38.12	11.8	38.39	47.09	21.65
A12	B1	3	76.67	36.48	15.1	75.09	39.46	24.69
A12	B2	3	72.22	37.6	19.3	61.73	40.76	24.99
A12	B3	3	70	36.94	19.5	59.43	41.89	25.19
A12	B4	3	63.33	36.64	13	32.43	51.02	24.74
A13	B1	3	64.44	35.06	21.5	34.92	45.34	19.39
A13	B2	3	60	35.33	16.9	30.92	37.99	19.81
A13	B3	3	46.67	36.07	16	29.6	40.83	20.49
A13	B4	3	31.11	36.84	9	23.6	38.95	20.14
A14	B1	3	50	36.49	18.7	80.22	41.85	20.77
A14	B2	3	44.44	36.18	16.1	53.96	37.17	21.39
A14	B3	3	23.33	38.53	15.6	51.08	38.47	21.18
A14	B4	3	17.78	38.14	11.2	37.05	34.95	20.82
A15	B1	3	72.22	44.94	17.4	79.49	39.97	20.99
A15	B2	3	67.78	42.23	15.5	42.39	40.76	20.9
A15	B3	3	40	43.25	14.1	41.22	45.86	20.57
A15	B4	3	31.11	42.7	12.5	37.64	40.66	22.14
A16	B1	3	34.44	42.83	18.1	84.27	37.03	24.77
A16	B2	3	27.78	41.64	18.2	75.57	41.51	23.22
A16	B3	3	22.22	42.99	13.6	46.74	40.42	24.44
A16	B4	3	17.78	44.07	15.4	37.92	40.86	24.46
A17	B1	3	17.78	40.01	21	89.34	45.2	19.78
A17	B2	3	12.22	39	21.3	72.24	41.1	19.34
A17	B3	3	10	39.68	17.7	70.97	39.39	19.56
A17	B4	3	5.56	38.9	9.6	56.8	31.32	19.98
A18	B1	3	63.33	42.73	10.4	75.57	42.3	25.56
A18	B2	3	41.11	42.39	13.3	53.76	45.92	24.61
A18	B3	3	36.67	41.82	10.4	50.6	43.9	24.83
A18	B4	3	27.78	42.53	10.3	26.75	41.92	24.92
A19	B1	3	75.56	43.64	13.9	92.85	39.6	23.32
A19	B2	3	55.56	42.94	13.8	44.25	39.87	23.81
A19	B3	3	52.22	43.95	10.7	39.83	38.43	21.9
A19	B4	3	32.22	44.41	8.3	30.05	39.02	22.1
A20	B1	3	34.44	41.11	16.1	41.35	37.54	22.19
A20	B2	3	12.22	38.55	17.3	36.88	36.66	22.74
A20	B3	3	10	39.88	18.3	29.91	38.64	21.74
A20	B4	3	8.89	38.09	13.5	28.92	40.04	22.89
A21	B1	3	75.56	41.64	11.2	86.17	41.03	23
A21	B2	3	66.67	43.84	12.9	74.54	46.71	22.05
A21	B3	3	55.56	41.84	13.4	72.84	48.22	22.81
A21	B4	3	27.78	40.59	14.1	62.35	37.31	22.52
A22	B1	3	70	36.65	20	77.87	43.87	23.96
A22	B2	3	54.44	36.23	16.9	63.04	43.26	24.16
A22	B3	3	44.44	35.24	15.8	48.58	40.04	23.76
A22	B4	3	35.56	36.48	14.9	31.44	40.55	24.14
A23	B1	3	93.33	35.71	13.7	93.17	39.94	21.3
A23	B2	3	87.78	34.86	11.5	48.55	41.27	21.97
A23	B3	3	85.56	35.18	11.1	42.84	36.86	21.39
A23	B4	3	81.11	35.16	7.2	32.15	40.76	20.78
A24	B1	3	77.78	41.81	9.7	79.17	41.1	23.21
A24	B2	3	75.56	42.87	13.4	45.75	38.57	23.2
A24	B3	3	72.22	41.36	11.6	34.06	36.83	23.18
A24	B4	3	67.78	40.9	11.1	31.39	34.2	23.7
A25	B1	3	58.89	38.12	18.5	67.02	41.76	23.09
A25	B2	3	38.89	37.36	19	50.92	41.79	23.14
A25	B3	3	35.56	36.69	18.2	47.37	43.15	23.37
A25	B4	3	16.67	37.21	17.3	39.98	43.53	22.11
A26	B1	3	41.11	41.03	13	69.7	39.05	24.82
A26	B2	3	33.33	41.25	12.8	61.27	42.37	24.2
A26	B3	3	30	38.86	13.2	56.47	35.83	24.13
A26	B4	3	16.67	41.37	8.1	41.08	34.43	24.25
A27	B1	3	70	39.79	14.8	74.68	34.02	21.8
A27	B2	3	62.22	40.91	13.5	49.11	39.84	21.05
A27	B3	3	57.78	39.94	11.9	42.22	43.87	21.65
A27	B4	3	45.56	40.76	8.7	39.86	42.98	21.17
A28	B1	3	64.44	43.04	11.6	83.54	36.72	25.03
A28	B2	3	61.11	41.83	12.9	56.27	40.04	24.14
A28	B3	3	54.44	41.97	15.5	46.68	37.85	24.98
A28	B4	3	40	41.21	10.3	30.14	31.39	24.1
A29	B1	3	70	34.35	12.4	67.17	34.5	26.43
A29	B2	3	65.56	34.8	15.5	55.33	39.46	25.15
A29	B3	3	55.56	35.1	14.1	43.08	41.51	25.63
A29	B4	3	47.78	34.93	17.3	37.2	40.86	25.53
A30	B1	3	56.67	38.96	22.7	76.44	46.88	21.82
A30	B2	3	50	39.46	18.3	54.7	44.39	21.34
A30	B3	3	42.22	39.19	16.8	47.53	38.16	21.88
A30	B4	3	30	38.84	12.7	36.51	42.5	21.5
A31	B1	3	68.89	35.27	18.9	79.02	34.23	19.97
A31	B2	3	51.11	35.53	16.4	67.11	39.43	20.95
A31	B3	3	38.89	36.14	15.2	58.98	46.26	22.15
A31	B4	3	26.67	36.69	15.7	35.97	44.08	21.19
A32	B1	3	92.22	42.47	17.9	70.47	39.22	21.85
A32	B2	3	76.67	42.5	16.2	57.3	42.98	21.78
A32	B3	3	74.44	41.14	20.2	46.56	44.83	22.64
A32	B4	3	70	41.79	12.9	35.92	41.55	23.59
A33	B1	3	62.22	38.78	16.3	81.48	47.77	25.1
A33	B2	3	56.67	38.73	18.4	37.29	43.46	25.89
A33	B3	3	50	37.13	17	30.2	41.13	25.54
A33	B4	3	26.67	36.94	13.4	29.12	41.85	24.63
A34	B1	3	92.22	35.57	17	93.15	37.65	22.75
A34	B2	3	90	37.03	14.2	37.8	40.42	24.08
A34	B3	3	83.33	34.82	12	27.97	35.6	23.17
A34	B4	3	73.33	35.75	9	25.01	38.47	22.95
A35	B1	3	22.22	33.94	11.5	94.57	41.55	20.28
A35	B2	3	17.78	35.17	9.9	42.56	37.75	21.11
A35	B3	3	8.89	35.39	9.9	39.38	34.06	20.15
A35	B4	3	6.67	35.5	9.4	25.57	39.08	20.83
A36	B1	3	45.56	44.93	18.8	62.56	42.3	21.52
A36	B2	3	34.44	43.33	22.5	43.68	44.76	21.77
A36	B3	3	32.22	44.81	18	38.06	37.58	20.95
A36	B4	3	26.67	44.92	14.3	24.81	41.14	21.98
A37	B1	3	57.78	36.22	11.2	64.44	36.45	24.66
A37	B2	3	53.33	37.31	9.9	52.85	39.7	23.6
A37	B3	3	30	36.79	8.9	37.26	40.86	24.22
A37	B4	3	13.33	38.17	11.5	31.65	43.53	23.15
A38	B1	3	23.33	43.97	17.3	84.49	28.18	19.96
A38	B2	3	13.33	41.3	18.3	57.03	32.96	21.2
A38	B3	3	6.67	43.25	13.3	35.98	32.79	20.75
A38	B4	3	4.44	42.59	13.4	24.61	32.04	21.95
A39	B1	3	65.56	44.46	10	75.32	38.54	27.36
A39	B2	3	55.56	41.95	12.4	42.67	41.31	25.7
A39	B3	3	38.89	42.04	13.5	26.02	46.33	26.87
A39	B4	3	22.22	44.17	8.8	24.22	40.9	26.31
A40	B1	3	77.78	34.2	15.8	63.82	40.69	25.9
A40	B2	3	61.11	35.73	18.9	54.84	42.23	26.17
A40	B3	3	52.22	34.67	11.6	42.84	42.98	25.26
A40	B4	3	34.44	35.59	9.3	39.22	32.62	26.53
A41	B1	3	72.22	36.37	14.8	79.38	42.84	19.69
A41	B2	3	61.11	36.39	18	63.28	36.11	20.21
A41	B3	3	36.67	36.69	16.8	36.13	44.08	21.97
A41	B4	3	27.78	36.74	17.8	25.76	35.08	20.58

## Sheet: Data for the process of calcula
		Germination potential				SOD（U/g)				Plant hight				Germ length				Chlorophyll SPAD				PRO（ng/g)
A1	B1	61.11	62.22	60	61.11	48.49	47.76	47.18	47.81	12.8	12.6	13.1	12.8333	60.28	59.51	61.81	60.5333	39.53	39.02	40.55	39.7	25.02	23.97	24.77	24.5867
A1	B2	45.56	47.78	46.67	46.67	47.44	48.18	46.33	47.3167	11.8	11.6	12.1	11.8333	55.48	54.77	56.9	55.7167	39.1	38.59	40.12	39.27	23.68	23.48	23.6	23.5867
A1	B3	30	32.22	31.11	31.11	45	45.72	45.11	45.2767	11	10.9	11.3	11.0667	48.12	47.51	49.32	48.3167	28	27.64	28.73	28.1233	24.61	23.8	24.4	24.27
A1	B4	25.56	24.44	24.44	24.8133	45.52	47.07	46.73	46.44	10.6	10.5	10.9	10.6667	34.81	34.37	35.67	34.95	41.8	41.26	42.88	41.98	25.35	24.44	24.85	24.88
A2	B1	43.33	44.44	44.44	44.07	42.73	41.41	41.83	41.99	16.6	16.3	17	16.6333	72.84	71.92	74.69	73.15	43.47	42.9	44.59	43.6533	23.67	22.85	23.74	23.42
A2	B2	20	17.78	21.11	19.63	42.52	43.75	42.49	42.92	17	16.7	17.4	17.0333	61.37	60.59	62.92	61.6267	47.63	47.02	48.87	47.84	22.43	22.51	22.54	22.4933
A2	B3	16.67	17.78	18.89	17.78	40.81	42.67	42.68	42.0533	15.3	15.1	15.7	15.3667	48.9	48.28	50.16	49.1133	44.17	43.6	45.31	44.36	22.42	22.29	22.41	22.3733
A2	B4	14.44	16.67	15.56	15.5567	40.74	43.28	42.24	42.0867	10.9	10.8	11.2	10.9667	46.5	45.92	47.68	46.7	42.83	42.28	43.94	43.0167	23.74	24.11	23.31	23.72
A3	B1	35.56	36.67	36.67	36.3	39.25	39.19	40.69	39.71	13.6	13.4	13.9	13.6333	74.01	73.08	75.88	74.3233	30.9	30.5	31.7	31.0333	19.44	19.94	20.96	20.1133
A3	B2	28.89	27.78	27.78	28.15	42.54	42.04	41.15	41.91	15.4	15.2	15.8	15.4667	64.97	64.15	66.63	65.25	42.03	41.49	43.12	42.2133	19.53	20.9	21.03	20.4867
A3	B3	23.33	24.44	25.56	24.4433	39.2	38.66	40.33	39.3967	11.6	11.5	11.9	11.6667	64.76	63.94	66.41	65.0367	29.83	29.45	30.6	29.96	19.89	20.87	19.67	20.1433
A3	B4	13.33	12.22	12.22	12.59	39.76	40.59	41.51	40.62	8	7.9	8.2	8.03333	48.77	48.16	49.99	48.9733	40.13	39.61	41.17	40.3033	19.87	20.88	20.09	20.28
A4	B1	40	41.11	43.33	41.48	41.9	43.09	42.71	42.5667	10.9	10.7	11.1	10.9	71.32	70.44	73.08	71.6133	38.93	38.43	39.94	39.1	23.04	23.59	22.73	23.12
A4	B2	32.22	31.11	30	31.11	40.25	41.24	42.12	41.2033	10.5	10.4	10.8	10.5667	64.82	63.98	66.49	65.0967	37.83	37.34	38.81	37.9933	21.98	22.52	22.72	22.4067
A4	B3	24.44	23.33	25.56	24.4433	40.49	40.58	42.17	41.08	13	12.8	13.4	13.0667	55.9	55.19	57.31	56.1333	40.07	39.55	41.1	40.24	23.68	23.43	22.83	23.3133
A4	B4	13.33	14.44	15.56	14.4433	40.84	41.41	41.06	41.1033	14.2	14	14.5	14.2333	53.53	52.86	54.86	53.75	38.3	37.81	39.29	38.4667	22.27	21.98	22.64	22.2967
A5	B1	62.22	64.44	65.56	64.0733	49.32	49.26	46.6	48.3933	18.4	18.1	18.8	18.4333	68.84	67.97	70.59	69.1333	36.77	36.29	37.72	36.9267	22.18	22.24	22.22	22.2133
A5	B2	57.78	60	58.89	58.89	46.93	46.14	46.54	46.5367	21.3	21	21.8	21.3667	42.19	41.66	43.27	42.3733	32.83	32.41	33.68	32.9733	22.31	22.08	21.69	22.0267
A5	B3	51.11	50	50	50.37	48.06	47.05	46.34	47.15	21.5	21.2	22	21.5667	30.12	29.76	30.85	30.2433	37.17	36.69	38.13	37.33	22.71	22.42	22.92	22.6833
A5	B4	30	28.89	31.11	30	45.68	46.72	45.53	45.9767	18	17.7	18.4	18.0333	20.55	20.29	21.08	20.64	41.07	40.54	42.13	41.2467	21.65	22.12	21.67	21.8133
A6	B1	61.11	60	58.89	60	35.65	36.31	35.59	35.85	12.5	12.3	12.8	12.5333	67.7	66.84	69.42	67.9867	40.57	40.04	41.61	40.74	22.04	22.34	22.5	22.2933
A6	B2	41.11	40	42.22	41.11	35.77	35.87	35.44	35.6933	12	11.8	12.3	12.0333	43.18	42.64	44.28	43.3667	45.07	44.48	46.23	45.26	23.44	22.39	23.21	23.0133
A6	B3	32.22	33.33	34.44	33.33	36.24	38.29	36.77	37.1	14.1	13.9	14.4	14.1333	41.46	40.93	42.5	41.63	42.3	41.75	43.39	42.48	21.85	22.8	21.94	22.1967
A6	B4	24.44	25.56	24.44	24.8133	35.86	36.48	38.02	36.7867	12	11.8	12.3	12.0333	34.95	34.51	35.84	35.1	46.8	46.2	48.01	47.0033	22.02	21.68	22.82	22.1733
A7	B1	35.56	38.89	40	38.15	37.36	38.53	37.16	37.6833	23.8	23.5	24.4	23.9	89.57	88.45	91.79	89.9367	35.3	34.84	36.21	35.45	24.28	24.69	24.46	24.4767
A7	B2	23.33	24.44	25.56	24.4433	37.13	38.01	36.96	37.3667	20.7	20.4	21.2	20.7667	70.58	69.7	72.35	70.8767	39.57	39.06	40.59	39.74	24.57	24.23	23.54	24.1133
A7	B3	14.44	15.56	15.56	15.1867	39.14	38.72	38.44	38.7667	21.6	21.3	22.1	21.6667	66.31	65.47	67.99	66.59	39.73	39.22	40.76	39.9033	23.37	23.54	23.82	23.5767
A7	B4	6.67	7.78	7.78	7.41	37.16	36.76	37.8	37.24	18.3	18	18.7	18.3333	54.13	53.46	55.48	54.3567	37.7	37.21	38.67	37.86	24.42	23.68	23.55	23.8833
A8	B1	53.33	51.11	55.56	53.3333	45.86	44.43	43.73	44.6733	10.7	10.5	10.9	10.7	38.92	38.42	39.91	39.0833	43	42.45	44.11	43.1867	21.26	20.98	21.58	21.2733
A8	B2	35.56	36.67	34.44	35.5567	44.83	44.32	44.12	44.4233	13.3	13.1	13.6	13.3333	35.61	35.16	36.53	35.7667	39.73	39.22	40.76	39.9033	22.72	22.34	21.96	22.34
A8	B3	23.33	24.44	25.56	24.4433	44.53	44.59	44.66	44.5933	12.5	12.3	12.8	12.5333	11.75	11.6	12.05	11.8	40.37	39.85	41.41	40.5433	20.74	21.54	20.71	20.9967
A8	B4	14.44	15.56	16.67	15.5567	44.91	43.94	44.23	44.36	7.7	7.6	7.9	7.73333	8.05	7.95	8.26	8.08667	40.83	40.31	41.89	41.01	20.68	20.79	21.96	21.1433
A9	B1	36.67	37.78	38.89	37.78	45.52	44.07	43.69	44.4267	15.1	14.9	15.5	15.1667	87.04	85.93	89.26	87.41	36.1	35.63	37.03	36.2533	23.08	23.48	22.58	23.0467
A9	B2	22.22	21.11	22.22	21.85	42.96	43.5	43.19	43.2167	16.7	16.5	17.2	16.8	72.29	71.37	74.13	72.5967	34.13	33.69	35.02	34.28	21.75	21.99	22.19	21.9767
A9	B3	12.22	11.11	12.22	11.85	42.22	42.44	42.43	42.3633	14.2	14	14.6	14.2667	63.41	62.6	65.02	63.6767	36.53	36.06	37.48	36.69	22.85	22.43	23.29	22.8567
A9	B4	7.78	8.89	8.89	8.52	43.37	42.4	44.39	43.3867	12.2	12.1	12.5	12.2667	34.61	34.17	35.51	34.7633	38.1	37.61	39.09	38.2667	22.92	23.7	23.27	23.2967
A10	B1	51.11	53.33	52.22	52.22	42.24	41.83	41.27	41.78	13	12.8	13.3	13.0333	86.91	85.81	89.12	87.28	43	42.45	44.11	43.1867	24.49	24.63	23.59	24.2367
A10	B2	43.33	44.44	43.33	43.7	40.53	40.37	41.5	40.8	14.8	14.6	15.1	14.8333	67.81	66.95	69.53	68.0967	37.67	37.18	38.64	37.83	23.73	23.58	24.41	23.9067
A10	B3	24.44	26.67	25.56	25.5567	43.57	41.58	43.15	42.7667	13.8	13.6	14.1	13.8333	36.87	36.39	37.82	37.0267	39.63	39.12	40.66	39.8033	24.22	23.73	23.89	23.9467
A10	B4	15.56	16.67	15.56	15.93	41.91	41.78	40.77	41.4867	9.5	9.4	9.8	9.56667	23.98	23.68	24.59	24.0833	37.2	36.72	38.16	37.36	24.01	23.82	24.54	24.1233
A11	B1	91.11	88.89	88.89	89.63	35.03	37.3	35.23	35.8533	15.1	14.9	15.5	15.1667	73.32	72.39	75.19	73.6333	40.1	39.58	41.14	40.2733	20.77	20.91	21.75	21.1433
A11	B2	80	81.11	82.22	81.11	35.51	35.75	37.04	36.1	19.7	19.5	20.2	19.8	62.48	61.69	64.07	62.7467	43.33	42.77	44.46	43.52	21.93	22.28	21.26	21.8233
A11	B3	67.78	68.89	66.67	67.78	37.6	37.64	38.27	37.8367	15.7	15.4	16.1	15.7333	51.46	50.81	52.74	51.67	28.73	28.36	29.48	28.8567	21.49	21.82	22.22	21.8433
A11	B4	55.56	56.67	55.56	55.93	38.23	36.36	38.12	37.57	11.6	11.4	11.8	11.6	37.44	36.97	38.39	37.6	45.9	45.31	47.09	46.1	21.69	22.22	21.65	21.8533
A12	B1	76.67	77.78	76.67	77.04	36.21	38.48	36.48	37.0567	14.7	14.5	15.1	14.7667	73.22	72.28	75.09	73.53	38.47	37.97	39.46	38.6333	25.97	24.69	24.69	25.1167
A12	B2	73.33	74.44	72.22	73.33	36.3	36.37	37.6	36.7567	18.8	18.5	19.3	18.8667	60.21	59.45	61.73	60.4633	39.73	39.22	40.76	39.9033	24.47	24.06	24.99	24.5067
A12	B3	71.11	72.22	70	71.11	38.35	38.39	36.94	37.8933	19	18.8	19.5	19.1	57.97	57.23	59.43	58.21	40.83	40.3	41.89	41.0067	25.46	25.57	25.19	25.4067
A12	B4	64.44	62.22	63.33	63.33	36.56	37.61	36.64	36.9367	12.7	12.5	13	12.7333	31.62	31.22	32.43	31.7567	49.73	49.09	51.02	49.9467	24.76	24.38	24.74	24.6267
A13	B1	63.33	64.44	64.44	64.07	34.86	35.96	35.06	35.2933	20.9	20.6	21.5	21	34.04	33.6	34.92	34.1867	44.2	43.63	45.34	44.39	19.45	20.55	19.39	19.7967
A13	B2	58.89	57.78	60	58.89	36.28	37.18	35.33	36.2633	16.5	16.3	16.9	16.5667	30.15	29.77	30.92	30.28	37.03	36.55	37.99	37.19	19.62	19.21	19.81	19.5467
A13	B3	44.44	45.56	46.67	45.5567	36.62	36.03	36.07	36.24	15.6	15.4	16	15.6667	28.87	28.5	29.6	28.99	39.8	39.29	40.83	39.9733	20.13	19.73	20.49	20.1167
A13	B4	28.89	30	31.11	30	37.12	37.86	36.84	37.2733	8.8	8.6	9	8.8	23.02	22.72	23.6	23.1133	37.97	37.48	38.95	38.1333	20.91	19.89	20.14	20.3133
A14	B1	46.67	50	50	48.89	36.61	36.57	36.49	36.5567	18.2	18	18.7	18.3	78.23	77.23	80.22	78.56	40.8	40.27	41.85	40.9733	20.45	21.69	20.77	20.97
A14	B2	42.22	43.33	44.44	43.33	36.18	38.24	36.18	36.8667	15.7	15.5	16.1	15.7667	52.62	51.96	53.96	52.8467	36.23	35.76	37.17	36.3867	20.89	21.02	21.39	21.1
A14	B3	23.33	24.44	23.33	23.7	37.73	39.06	38.53	38.44	15.3	15.1	15.6	15.3333	49.8	49.16	51.08	50.0133	37.5	37.01	38.47	37.66	20.89	20.88	21.18	20.9833
A14	B4	15.56	16.67	17.78	16.67	39.65	38.39	38.14	38.7267	11	10.8	11.2	11	36.13	35.67	37.05	36.2833	34.07	33.63	34.95	34.2167	20.39	21.46	20.82	20.89
A15	B1	71.11	72.22	72.22	71.85	45.06	42.95	44.94	44.3167	17	16.8	17.4	17.0667	77.53	76.54	79.49	77.8533	38.97	38.46	39.97	39.1333	20.33	20.65	20.99	20.6567
A15	B2	67.78	68.89	67.78	68.15	42.25	42.89	42.23	42.4567	15.1	14.9	15.5	15.1667	41.33	40.8	42.39	41.5067	39.73	39.22	40.76	39.9033	20.87	20.28	20.9	20.6833
A15	B3	38.89	38.89	40	39.26	44.18	43.9	43.25	43.7767	13.8	13.6	14.1	13.8333	40.2	39.69	41.22	40.37	44.7	44.12	45.86	44.8933	20.9	21.17	20.57	20.88
A15	B4	28.89	28.89	31.11	29.63	44.82	43.21	42.7	43.5767	12.2	12.1	12.5	12.2667	36.7	36.23	37.64	36.8567	39.63	39.12	40.66	39.8033	22.4	21.61	22.14	22.05
A16	B1	34.44	35.56	34.44	34.8133	44.41	42.99	42.83	43.41	17.6	17.4	18.1	17.7	82.19	81.15	84.27	82.5367	36.1	35.63	37.03	36.2533	25.43	24.69	24.77	24.9633
A16	B2	26.67	26.67	27.78	27.04	41.75	43.56	41.64	42.3167	17.7	17.5	18.2	17.8	73.69	72.75	75.57	74.0033	40.47	39.94	41.51	40.64	23.76	23.39	23.22	23.4567
A16	B3	21.11	21.11	22.22	21.48	42.91	43.63	42.99	43.1767	13.3	13.1	13.6	13.3333	45.58	44.99	46.74	45.77	39.4	38.89	40.42	39.57	25.1	24.29	24.44	24.61
A16	B4	16.67	17.78	17.78	17.41	44.48	42.33	44.07	43.6267	15	14.8	15.4	15.0667	36.97	36.5	37.92	37.13	39.83	39.32	40.86	40.0033	24.53	25.18	24.46	24.7233
A17	B1	18.89	18.89	17.78	18.52	40.4	39.37	40.01	39.9267	20.5	20.2	21	20.5667	87.13	86.03	89.34	87.5	44.07	43.5	45.2	44.2567	18.49	18.95	19.78	19.0733
A17	B2	12.22	11.11	12.22	11.85	38.88	39.98	39	39.2867	20.8	20.5	21.3	20.8667	70.44	69.54	72.24	70.74	40.07	39.55	41.1	40.24	18.69	19.35	19.34	19.1267
A17	B3	11.11	10	10	10.37	41.31	41.87	39.68	40.9533	17.3	17.1	17.7	17.3667	69.22	68.34	70.97	69.51	38.4	37.9	39.39	38.5633	19.34	19.25	19.56	19.3833
A17	B4	5.56	6.67	5.56	5.93	39.79	41.1	38.9	39.93	9.4	9.2	9.6	9.4	55.39	54.68	56.8	55.6233	30.53	30.14	31.32	30.6633	21.15	20.89	19.98	20.6733
A18	B1	64.44	63.33	63.33	63.7	43.32	41.79	42.73	42.6133	10.1	10	10.4	10.1667	73.69	72.75	75.57	74.0033	41.23	40.7	42.3	41.41	26.43	25.95	25.56	25.98
A18	B2	43.33	42.22	41.11	42.22	44.1	41.87	42.39	42.7867	13	12.8	13.3	13.0333	52.43	51.77	53.76	52.6533	44.77	44.19	45.92	44.96	25.58	25.79	24.61	25.3267
A18	B3	42.22	37.78	36.67	38.89	41.66	41.16	41.82	41.5467	10.2	10.1	10.4	10.2333	49.33	48.7	50.6	49.5433	42.8	42.25	43.9	42.9833	24.17	24.75	24.83	24.5833
A18	B4	26.67	26.67	27.78	27.04	42.05	43.13	42.53	42.57	10.1	9.9	10.3	10.1	26.12	25.81	26.75	26.2267	40.87	40.34	41.92	41.0433	24.12	25.34	24.92	24.7933
A19	B1	73.33	74.44	75.56	74.4433	45.35	44.7	43.64	44.5633	13.6	13.4	13.9	13.6333	90.53	89.37	92.85	90.9167	38.6	38.1	39.6	38.7667	22.94	22.17	23.32	22.81
A19	B2	56.67	57.78	55.56	56.67	43.91	42.78	42.94	43.21	13.5	13.3	13.8	13.5333	43.14	42.59	44.25	43.3267	38.87	38.36	39.87	39.0333	23.48	23.62	23.81	23.6367
A19	B3	54.44	53.33	52.22	53.33	43.9	43.3	43.95	43.7167	10.4	10.3	10.7	10.4667	38.87	38.39	39.83	39.03	37.47	36.98	38.43	37.6267	21.92	22.19	21.9	22.0033
A19	B4	32.22	33.33	32.22	32.59	42.8	42.58	44.41	43.2633	8.1	8	8.3	8.13333	29.32	28.96	30.05	29.4433	38.03	37.54	39.02	38.1967	21.63	21.72	22.1	21.8167
A20	B1	36.67	36.67	34.44	35.9267	39.77	39.18	41.11	40.02	15.7	15.5	16.1	15.7667	40.34	39.83	41.35	40.5067	36.6	36.13	37.54	36.7567	22.16	22.89	22.19	22.4133
A20	B2	11.11	11.11	12.22	11.48	39.65	40.63	38.55	39.61	16.9	16.6	17.3	16.9333	35.97	35.52	36.88	36.1233	35.73	35.27	36.66	35.8867	23.15	22.83	22.74	22.9067
A20	B3	10	10	10	10	40.07	39.13	39.88	39.6933	17.9	17.7	18.3	17.9667	29.18	28.81	29.91	29.3	37.67	37.18	38.64	37.83	21.5	21.83	21.74	21.69
A20	B4	8.89	8.89	8.89	8.89	38.18	39.71	38.09	38.66	13.2	13	13.5	13.2333	28.21	27.86	28.92	28.33	39.03	38.53	40.04	39.2	23.41	22.1	22.89	22.8
A21	B1	73.33	74.44	75.56	74.4433	43.45	43.26	41.64	42.7833	11	10.8	11.2	11	84.02	82.95	86.17	84.38	40	39.48	41.03	40.17	23.4	22.53	23	22.9767
A21	B2	67.78	68.89	66.67	67.78	42.92	42.52	43.84	43.0933	12.6	12.4	12.9	12.6333	72.7	71.78	74.54	73.0067	45.53	44.95	46.71	45.73	22.34	22.74	22.05	22.3767
A21	B3	56.67	54.44	55.56	55.5567	40.23	41.88	41.84	41.3167	13.1	12.9	13.4	13.1333	71.04	70.14	72.84	71.34	47	46.39	48.22	47.2033	23.28	24.05	22.81	23.38
A21	B4	27.78	25.56	27.78	27.04	40.13	42	40.59	40.9067	13.7	13.5	14.1	13.7667	60.79	60.01	62.35	61.05	36.37	35.9	37.31	36.5267	22.45	22.25	22.52	22.4067
A22	B1	68.89	70	70	69.63	35.29	35.19	36.65	35.71	19.5	19.2	20	19.5667	75.94	74.98	77.87	76.2633	42.77	42.21	43.87	42.95	24.63	24.34	23.96	24.31
A22	B2	54.44	55.56	54.44	54.8133	36.48	37.45	36.23	36.72	16.5	16.3	16.9	16.5667	61.47	60.68	63.04	61.73	42.17	41.62	43.26	42.35	25.33	23.95	24.16	24.48
A22	B3	43.33	44.44	44.44	44.07	35.34	35.53	35.24	35.37	15.4	15.2	15.8	15.4667	47.38	46.77	48.58	47.5767	39.03	38.53	40.04	39.2	23.02	24.22	23.76	23.6667
A22	B4	33.33	36.67	35.56	35.1867	36.12	36.87	36.48	36.49	14.6	14.4	14.9	14.6333	30.65	30.26	31.44	30.7833	39.53	39.02	40.55	39.7	25.05	24.48	24.14	24.5567
A23	B1	95.56	92.22	93.33	93.7033	33.42	33.3	35.71	34.1433	13.4	13.2	13.7	13.4333	90.86	89.7	93.17	91.2433	38.93	38.43	39.94	39.1	20.83	21.87	21.3	21.3333
A23	B2	88.89	88.89	87.78	88.52	36.36	35.03	34.86	35.4167	11.2	11.1	11.5	11.2667	47.35	46.75	48.55	47.55	40.23	39.71	41.27	40.4033	21.7	22.09	21.97	21.92
A23	B3	86.67	85.56	85.56	85.93	33.6	33.98	35.18	34.2533	10.8	10.7	11.1	10.8667	41.78	41.25	42.84	41.9567	35.93	35.47	36.86	36.0867	20.42	21.88	21.39	21.23
A23	B4	83.33	82.22	81.11	82.22	36.1	36.08	35.16	35.78	7	6.9	7.2	7.03333	31.35	30.95	32.15	31.4833	39.73	39.22	40.76	39.9033	21.16	22.19	20.78	21.3767
A24	B1	78.89	80	77.78	78.89	43.22	42.02	41.81	42.35	9.4	9.3	9.7	9.46667	77.21	76.24	79.17	77.54	40.07	39.55	41.1	40.24	22.54	21.95	23.21	22.5667
A24	B2	76.67	75.56	75.56	75.93	42.61	41.3	42.87	42.26	13	12.9	13.4	13.1	44.61	44.04	45.75	44.8	37.6	37.11	38.57	37.76	23.94	23.02	23.2	23.3867
A24	B3	74.44	72.22	72.22	72.96	40.17	40.63	41.36	40.72	11.3	11.2	11.6	11.3667	33.22	32.8	34.06	33.36	35.9	35.44	36.83	36.0567	22.94	22.27	23.18	22.7967
A24	B4	67.78	66.67	67.78	67.41	39.82	41.73	40.9	40.8167	10.8	10.7	11.1	10.8667	30.61	30.22	31.39	30.74	33.33	32.9	34.2	33.4767	24.1	22.93	23.7	23.5767
A25	B1	61.11	60	58.89	60	36.29	37.88	38.12	37.43	18	17.8	18.5	18.1	65.33	64.49	67.02	65.6133	40.7	40.17	41.76	40.8767	23.02	23.38	23.09	23.1633
A25	B2	40	38.89	38.89	39.26	36.98	36.98	37.36	37.1067	18.5	18.3	19	18.6	49.64	49	50.92	49.8533	40.73	40.21	41.79	40.91	22.89	22.59	23.14	22.8733
A25	B3	34.44	35.56	35.56	35.1867	35.18	37.2	36.69	36.3567	17.7	17.5	18.2	17.8	46.18	45.59	47.37	46.38	42.07	41.52	43.15	42.2467	23.65	23.1	23.37	23.3733
A25	B4	17.78	15.56	16.67	16.67	37.85	36.84	37.21	37.3	16.9	16.7	17.3	16.9667	38.98	38.48	39.98	39.1467	42.43	41.89	43.53	42.6167	22.38	22.65	22.11	22.38
A26	B1	38.89	40	41.11	40	41.75	40.02	41.03	40.9333	12.7	12.5	13	12.7333	67.98	67.11	69.7	68.2633	38.07	37.58	39.05	38.2333	24.91	25.17	24.82	24.9667
A26	B2	36.67	35.56	33.33	35.1867	40.47	40.84	41.25	40.8533	12.5	12.3	12.8	12.5333	59.74	58.97	61.27	59.9933	41.3	40.77	42.37	41.48	25.04	24.86	24.2	24.7
A26	B3	34.44	31.11	30	31.85	38.78	41.04	38.86	39.56	12.9	12.7	13.2	12.9333	55.07	54.38	56.47	55.3067	34.93	34.48	35.83	35.08	24.41	24.37	24.13	24.3033
A26	B4	18.89	17.78	16.67	17.78	41.64	41.72	41.37	41.5767	7.9	7.8	8.1	7.93333	40.05	39.54	41.08	40.2233	33.57	33.13	34.43	33.71	23.15	23.96	24.25	23.7867
A27	B1	70	72.22	70	70.74	41.13	41.98	39.79	40.9667	14.4	14.2	14.8	14.4667	72.83	71.9	74.68	73.1367	33.17	32.74	34.02	33.31	21.39	21.31	21.8	21.5
A27	B2	64.44	63.33	62.22	63.33	41.77	41.51	40.91	41.3967	13.2	13	13.5	13.2333	47.9	47.29	49.11	48.1	38.83	38.33	39.84	39	21.17	22.16	21.05	21.46
A27	B3	61.11	58.89	57.78	59.26	39.6	39.13	39.94	39.5567	11.6	11.4	11.9	11.6333	41.16	40.62	42.22	41.3333	42.77	42.21	43.87	42.95	20.89	21	21.65	21.18
A27	B4	47.78	46.67	45.56	46.67	41.92	42.28	40.76	41.6533	8.5	8.4	8.7	8.53333	38.86	38.36	39.86	39.0267	41.9	41.36	42.98	42.08	20.6	22.01	21.17	21.26
A28	B1	65.56	64.44	64.44	64.8133	43.01	42.45	43.04	42.8333	11.3	11.2	11.6	11.3667	81.43	80.37	83.54	81.78	35.8	35.34	36.72	35.9533	25.92	25.72	25.03	25.5567
A28	B2	63.33	62.22	61.11	62.22	42.14	42.76	41.83	42.2433	12.6	12.5	12.9	12.6667	54.85	54.13	56.27	55.0833	39.03	38.53	40.04	39.2	23.95	25.34	24.14	24.4767
A28	B3	56.67	55.56	54.44	55.5567	42.27	40.91	41.97	41.7167	15.1	14.9	15.5	15.1667	45.5	44.91	46.68	45.6967	36.9	36.42	37.85	37.0567	24.08	23.98	24.98	24.3467
A28	B4	41.11	40	40	40.37	41.44	40.73	41.21	41.1267	10.1	9.9	10.3	10.1	29.38	28.99	30.14	29.5033	30.6	30.2	31.39	30.73	24.41	25.09	24.1	24.5333
A29	B1	67.78	70	70	69.26	32.78	34.3	34.35	33.81	12.1	11.9	12.4	12.1333	65.49	64.64	67.17	65.7667	33.63	33.2	34.5	33.7767	27.33	25.83	26.43	26.53
A29	B2	66.67	65.56	65.56	65.93	33.51	35.02	34.8	34.4433	15.1	14.9	15.5	15.1667	53.94	53.24	55.33	54.17	38.47	37.97	39.46	38.6333	25.06	24.82	25.15	25.01
A29	B3	53.33	54.44	55.56	54.4433	32.88	33.37	35.1	33.7833	13.7	13.5	14.1	13.7667	41.99	41.45	43.08	42.1733	40.47	39.94	41.51	40.64	26.61	26.7	25.63	26.3133
A29	B4	48.89	46.67	47.78	47.78	32.83	34.29	34.93	34.0167	16.9	16.6	17.3	16.9333	36.26	35.79	37.2	36.4167	39.83	39.32	40.86	40.0033	26.54	26.07	25.53	26.0467
A30	B1	54.44	57.78	56.67	56.2967	38.08	38.48	38.96	38.5067	22.1	21.8	22.7	22.2	74.52	73.56	76.44	74.84	45.7	45.11	46.88	45.8967	20.75	20.41	21.82	20.9933
A30	B2	42.22	47.78	50	46.6667	39.3	38.2	39.46	38.9867	17.8	17.6	18.3	17.9	53.32	52.64	54.7	53.5533	43.27	42.71	44.39	43.4567	22.39	21.32	21.34	21.6833
A30	B3	46.67	43.33	42.22	44.0733	38.29	38.65	39.19	38.71	16.4	16.1	16.8	16.4333	46.33	45.73	47.53	46.53	37.2	36.72	38.16	37.36	22.99	22.81	21.88	22.56
A30	B4	33.33	32.22	30	31.85	36.64	37.56	38.84	37.68	12.4	12.2	12.7	12.4333	35.59	35.13	36.51	35.7433	41.43	40.9	42.5	41.61	21.42	21.83	21.5	21.5833
A31	B1	67.78	70	68.89	68.89	35.62	37.71	35.27	36.2	18.4	18.1	18.9	18.4667	77.03	76.04	79.02	77.3633	33.37	32.94	34.23	33.5133	20.11	20.07	19.97	20.05
A31	B2	51.11	52.22	51.11	51.48	35.88	35.71	35.53	35.7067	16	15.8	16.4	16.0667	65.42	64.57	67.11	65.7	38.43	37.94	39.43	38.6	21.11	21.12	20.95	21.06
A31	B3	38.89	40	38.89	39.26	35.64	36.17	36.14	35.9833	14.9	14.7	15.2	14.9333	57.49	56.75	58.98	57.74	45.1	44.52	46.26	45.2933	22.06	21.11	22.15	21.7733
A31	B4	28.89	27.78	26.67	27.78	34.7	34.79	36.69	35.3933	15.3	15.1	15.7	15.3667	35.06	34.61	35.97	35.2133	42.97	42.41	44.08	43.1533	20.33	21.06	21.19	20.86
A32	B1	93.33	92.22	92.22	92.59	42.51	41.8	42.47	42.26	17.5	17.2	17.9	17.5333	68.69	67.8	70.47	68.9867	38.23	37.74	39.22	38.3967	21.89	21.93	21.85	21.89
A32	B2	72.22	75.56	76.67	74.8167	41.6	42.03	42.5	42.0433	15.8	15.6	16.2	15.8667	55.86	55.14	57.3	56.1	41.9	41.36	42.98	42.08	22.09	21.59	21.78	21.82
A32	B3	73.33	73.33	74.44	73.7	41.8	41.53	41.14	41.49	19.7	19.5	20.2	19.8	45.39	44.8	46.56	45.5833	43.7	43.14	44.83	43.89	21.16	21.75	22.64	21.85
A32	B4	71.11	70	70	70.37	42.45	42.15	41.79	42.13	12.6	12.4	12.9	12.6333	35.01	34.56	35.92	35.1633	40.5	39.98	41.55	40.6767	23.63	22.03	23.59	23.0833
A33	B1	63.33	62.22	62.22	62.59	37.8	37.85	38.78	38.1433	15.9	15.6	16.3	15.9333	79.41	78.38	81.48	79.7567	46.57	45.97	47.77	46.77	26.19	26.29	25.1	25.86
A33	B2	57.78	56.67	56.67	57.04	37.18	38.73	38.73	38.2133	18	17.8	18.4	18.0667	36.35	35.88	37.29	36.5067	42.37	41.82	43.46	42.55	25.15	25.33	25.89	25.4567
A33	B3	51.11	48.89	50	50	37.22	37.66	37.13	37.3367	16.6	16.4	17	16.6667	29.45	29.08	30.2	29.5767	40.1	39.58	41.13	40.27	24.39	24.76	25.54	24.8967
A33	B4	27.78	26.67	26.67	27.04	36.37	37.34	36.94	36.8833	13.1	12.9	13.4	13.1333	28.38	28.01	29.12	28.5033	40.8	40.27	41.85	40.9733	25.22	25.47	24.63	25.1067
A34	B1	96.67	93.33	92.22	94.0733	33.88	36.25	35.57	35.2333	16.5	16.3	17	16.6	90.79	89.61	93.15	91.1833	36.7	36.23	37.65	36.86	23.09	23.54	22.75	23.1267
A34	B2	95.56	88.89	90	91.4833	35.82	36.17	37.03	36.34	13.9	13.7	14.2	13.9333	36.85	36.37	37.8	37.0067	39.4	38.89	40.42	39.57	23.77	23.01	24.08	23.62
A34	B3	90	82.22	83.33	85.1833	35.74	36.78	34.82	35.78	11.7	11.5	12	11.7333	27.26	26.91	27.97	27.38	34.7	34.25	35.6	34.85	22.68	22.11	23.17	22.6533
A34	B4	74.44	73.33	73.33	73.7	33.73	34.05	35.75	34.51	8.8	8.7	9	8.83333	24.38	24.07	25.01	24.4867	37.5	37.02	38.47	37.6633	21.67	22.75	22.95	22.4567
A35	B1	22.22	23.33	22.22	22.59	33.64	33.92	33.94	33.8333	11.3	11.1	11.5	11.3	92.2	91.01	94.57	92.5933	40.5	39.98	41.55	40.6767	19.67	20.97	20.28	20.3067
A35	B2	17.78	18.89	17.78	18.15	32.96	34.47	35.17	34.2	9.7	9.5	9.9	9.7	41.49	40.96	42.56	41.67	36.8	36.33	37.75	36.96	22.27	20.67	21.11	21.35
A35	B3	10	8.89	8.89	9.26	34.8	33.96	35.39	34.7167	9.7	9.5	9.9	9.7	38.38	37.88	39.38	38.5467	33.2	32.77	34.06	33.3433	20.89	21.34	20.15	20.7933
A35	B4	7.78	6.67	6.67	7.04	33.96	35.68	35.5	35.0467	9.2	9	9.4	9.2	24.93	24.6	25.57	25.0333	38.1	37.61	39.08	38.2633	21.19	20.46	20.83	20.8267
A36	B1	42.22	44.44	45.56	44.0733	45.68	45.41	44.93	45.34	18.3	18.1	18.8	18.4	60.97	60.18	62.56	61.2367	41.23	40.7	42.3	41.41	20.43	21.69	21.52	21.2133
A36	B2	35.56	36.67	34.44	35.5567	44.94	43.22	43.33	43.83	21.9	21.6	22.5	22	42.57	42.02	43.68	42.7567	43.63	43.07	44.76	43.82	22.14	21.58	21.77	21.83
A36	B3	34.44	32.22	32.22	32.96	45.24	43.17	44.81	44.4067	17.5	17.3	18	17.6	37.1	36.62	38.06	37.26	36.63	36.16	37.58	36.79	20.26	21.03	20.95	20.7467
A36	B4	27.78	26.67	26.67	27.04	45.27	44.91	44.92	45.0333	13.9	13.8	14.3	14	24.18	23.87	24.81	24.2867	40.1	39.58	41.14	40.2733	21.18	21.86	21.98	21.6733
A37	B1	56.67	58.89	57.78	57.78	36.5	37.24	36.22	36.6533	10.9	10.8	11.2	10.9667	62.82	62.01	64.44	63.09	35.53	35.07	36.45	35.6833	23.97	23.31	24.66	23.98
A37	B2	54.44	55.56	53.33	54.4433	39.45	37.85	37.31	38.2033	9.7	9.5	9.9	9.7	51.53	50.86	52.85	51.7467	38.7	38.2	39.7	38.8667	24.76	24.39	23.6	24.25
A37	B3	31.11	32.22	30	31.11	36.99	36.84	36.79	36.8733	8.7	8.6	8.9	8.73333	36.32	35.86	37.26	36.48	39.83	39.32	40.86	40.0033	24.16	23.19	24.22	23.8567
A37	B4	13.33	12.22	13.33	12.96	39.34	38.4	38.17	38.6367	11.2	11	11.5	11.2333	30.86	30.46	31.65	30.99	42.43	41.89	43.53	42.6167	22.59	23.83	23.15	23.19
A38	B1	21.11	22.22	23.33	22.22	44.39	43.07	43.97	43.81	16.9	16.7	17.3	16.9667	82.37	81.31	84.49	82.7233	27.47	27.11	28.18	27.5867	19.67	20.57	19.96	20.0667
A38	B2	12.22	12.22	13.33	12.59	41.05	42.03	41.3	41.46	17.9	17.6	18.3	17.9333	55.62	54.91	57.03	55.8533	32.13	31.72	32.96	32.27	20.72	20.17	21.2	20.6967
A38	B3	7.78	7.78	6.67	7.41	41.41	42.53	43.25	42.3967	13	12.8	13.3	13.0333	35.07	34.62	35.98	35.2233	31.97	31.55	32.79	32.1033	21.36	21.06	20.75	21.0567
A38	B4	5.56	5.56	4.44	5.18667	41.96	42.61	42.59	42.3867	13	12.9	13.4	13.1	23.99	23.68	24.61	24.0933	31.23	30.83	32.04	31.3667	21.7	21.74	21.95	21.7967
A39	B1	62.22	63.33	65.56	63.7033	44.7	43.51	44.46	44.2233	9.7	9.6	10	9.76667	73.41	72.46	75.32	73.73	37.57	37.08	38.54	37.73	27.38	27.23	27.36	27.3233
A39	B2	56.67	57.78	55.56	56.67	43.04	43.4	41.95	42.7967	12.1	12	12.4	12.1667	41.59	41.05	42.67	41.77	40.27	39.75	41.31	40.4433	25.49	25.74	25.7	25.6433
A39	B3	41.11	40	38.89	40	42.66	43.17	42.04	42.6233	13.2	13	13.5	13.2333	25.36	25.03	26.02	25.47	45.17	44.58	46.33	45.36	26.25	25.87	26.87	26.33
A39	B4	23.33	22.22	22.22	22.59	44.07	43.72	44.17	43.9867	8.6	8.5	8.8	8.63333	23.62	23.32	24.22	23.72	39.87	39.35	40.9	40.04	25.62	25.26	26.31	25.73
A40	B1	78.89	77.78	77.78	78.15	34.09	35.77	34.2	34.6867	15.4	15.2	15.8	15.4667	62.21	61.41	63.82	62.48	39.67	39.15	40.69	39.8367	26.99	26.44	25.9	26.4433
A40	B2	63.33	61.11	61.11	61.85	37.03	37.08	35.73	36.6133	18.4	18.2	18.9	18.5	53.46	52.77	54.84	53.69	41.17	40.64	42.23	41.3467	25.78	26.52	26.17	26.1567
A40	B3	53.33	50	52.22	51.85	35.07	35.18	34.67	34.9733	11.3	11.2	11.6	11.3667	41.77	41.23	42.84	41.9467	41.9	41.36	42.98	42.08	25.28	26.19	25.26	25.5767
A40	B4	36.67	33.33	34.44	34.8133	37.68	37.34	35.59	36.87	9.1	9	9.3	9.13333	38.23	37.74	39.22	38.3967	31.8	31.39	32.62	31.9367	26.19	25.51	26.53	26.0767
A41	B1	68.89	72.22	72.22	71.11	35.05	36.55	36.37	35.99	14.4	14.2	14.8	14.4667	77.37	76.37	79.38	77.7067	41.77	41.23	42.84	41.9467	19.72	20.03	19.69	19.8133
A41	B2	60	60	61.11	60.37	37.85	38.43	36.39	37.5567	17.5	17.3	18	17.6	61.69	60.89	63.28	61.9533	35.2	34.75	36.11	35.3533	19.79	20.24	20.21	20.08
A41	B3	37.78	35.56	36.67	36.67	34.94	35.08	36.69	35.57	16.4	16.1	16.8	16.4333	35.22	34.76	36.13	35.37	42.97	42.41	44.08	43.1533	21.77	20.56	21.97	21.4333
A41	B4	26.67	26.67	27.78	27.04	36.11	36.57	36.74	36.4733	17.4	17.2	17.8	17.4667	25.11	24.78	25.76	25.2167	34.2	33.76	35.08	34.3467	19.59	20.35	20.58	20.1733

## Sheet: Germination potential
1		2		3		4		Ux	CV	CV	CV	CV		wi	wi	wi	wi	D	D	D	D	AUM	averge
61.11	0.563708	46.67	0.439857	31.11	0.301834	24.8133	0.254781	0.390045	31.5974	44.9363	66.4905	79.0139		0.967048	1.04484	1.28284	1.18503	0.545132	0.459579	0.387206	0.301924	1.69384	0.379675
44.07	0.338172	19.63	0.101871	17.78	0.132068	15.5567	0.134617	0.176682	43.8148	106.835	116.34	126.03		1.34096	2.48409	2.24462	1.89016	0.453476	0.253056	0.296443	0.254448	1.25742	0.396731		B1	59.0963	19.3092	32.6741
36.3	0.23533	28.15	0.208366	24.4433	0.21693	12.59	0.0961056	0.189183	53.1933	74.5001	84.625	155.727		1.628	1.73224	1.63273	2.33555	0.383117	0.360941	0.354187	0.22446	1.32271	0.647506		B2	48.7626	20.9718	43.0079
41.48	0.303891	31.11	0.245365	24.4433	0.21693	14.4433	0.120164	0.221588	46.5506	67.4117	84.625	135.744		1.42469	1.56743	1.63273	2.03586	0.432952	0.384591	0.354187	0.244638	1.41637	0.768428		B3	39.9093	20.6852	51.8305
64.0733	0.602929	58.89	0.5926	50.37	0.547122	30	0.322112	0.516191	30.1361	35.6118	41.0665	65.3533		0.922323	0.828029	0.792323	0.980153	0.556096	0.49069	0.433497	0.315719	1.796	0.53409		B4	29.4046	19.606	66.6766
60	0.549016	41.11	0.37036	33.33	0.330107	24.8133	0.254781	0.376066	32.182	51.0138	62.0617	79.0139		0.984938	1.18615	1.1974	1.18503	0.540747	0.439302	0.39527	0.301924	1.67724	0.485291
38.15	0.259816	24.4433	0.162035	15.1867	0.0990406	7.41	0.028862	0.137438	50.6138	85.7976	136.206	264.588		1.54905	1.99492	2.62792	3.96823	0.402469	0.323247	0.26027	0.114531	1.10052	0.459405
53.3333	0.460778	35.5567	0.300946	24.4433	0.21693	15.5567	0.134617	0.278318	36.2047	58.9813	84.625	126.03		1.10806	1.37141	1.63273	1.89016	0.510568	0.412719	0.354187	0.254448	1.53192	0.0212454
37.78	0.254919	21.85	0.12962	11.85	0.0565461	8.52	0.0432713	0.121089	51.1095	95.9807	174.558	230.117		1.56422	2.2317	3.36787	3.45124	0.39875	0.289272	0.19044	0.14934	1.0278	0.409246
52.22	0.446043	43.7	0.402733	25.5567	0.231109	15.93	0.139463	0.304837	36.9766	47.9904	80.9385	123.076		1.13168	1.11585	1.5616	1.84586	0.504777	0.449389	0.3609	0.25743	1.5725	0.262882
89.63	0.941189	81.11	0.870339	67.78	0.768849	55.93	0.658719	0.809774	21.5432	25.856	30.5181	35.0545		0.659336	0.601191	0.588806	0.525739	0.62056	0.52324	0.452703	0.346315	1.94282	0.397732
77.04	0.774552	73.33	0.773093	71.11	0.811258	63.33	0.754781	0.778421	25.0638	28.5992	29.089	30.9585		0.767086	0.664975	0.561233	0.464308	0.594148	0.514087	0.455305	0.350451	1.91399	0.364357
64.07	0.602885	58.89	0.5926	45.5567	0.485821	30	0.322112	0.500855	30.1376	35.6118	45.4054	65.3533		0.922371	0.828029	0.876036	0.980153	0.556084	0.49069	0.425597	0.315719	1.78809	0.298838
48.89	0.401968	43.33	0.398108	23.7	0.207463	16.67	0.14907	0.289152	39.4952	48.4002	87.2792	117.612		1.20876	1.12538	1.68394	1.76392	0.485883	0.448022	0.349355	0.262947	1.54621	0.79776
71.85	0.705859	68.15	0.708345	39.26	0.405629	29.63	0.317309	0.534286	26.8743	30.773	52.6877	66.1694		0.822495	0.715519	1.01654	0.992393	0.580566	0.506834	0.412338	0.314895	1.81463	0.408054
34.8133	0.215653	27.04	0.194492	21.48	0.17919	17.41	0.158676	0.187003	55.4649	77.5584	96.2997	112.613		1.69752	1.80335	1.85797	1.68895	0.366076	0.350737	0.332931	0.267995	1.31774	0.785003
18.52	0	11.85	0.00462481	10.37	0.0376974	5.93	0.0096495	0.0129929	104.261	176.977	199.471	330.624		3.19094	4.11499	3.84853	4.95862	0	0.019031	0.14508	0.0478482	0.211959	0.434535
63.7	0.597988	42.22	0.384234	38.89	0.400917	27.04	0.283687	0.416706	30.3127	49.6726	53.1889	72.5074		0.927728	1.15496	1.02621	1.08745	0.554771	0.443777	0.411425	0.308495	1.71847	0.93623
74.4433	0.740184	56.67	0.564851	53.33	0.584819	32.59	0.355733	0.561397	25.9381	37.0069	38.7871	60.1595		0.793843	0.860466	0.748346	0.902258	0.587589	0.486035	0.437647	0.320963	1.83224	0.52208
35.9267	0.230389	11.48	0	10	0.0329852	8.89	0.0480744	0.0778622	53.7461	182.681	206.852	220.54		1.64491	4.24761	3.99093	3.3076	0.37897	0	0.131642	0.159011	0.669623	0.169272
74.4433	0.740184	67.78	0.703721	55.5567	0.613177	27.04	0.283687	0.585192	25.9381	30.941	37.2326	72.5074		0.793843	0.719425	0.718353	1.08745	0.587589	0.506274	0.440478	0.308495	1.84284	0.352354
69.63	0.676476	54.8133	0.541644	44.07	0.466887	35.1867	0.389442	0.518612	27.7311	38.2604	46.9371	55.7199		0.848719	0.889612	0.905589	0.835674	0.574138	0.481853	0.422808	0.325447	1.80425	0.287038
93.7033	0.995103	88.52	0.96296	85.93	1	82.22	1	0.989516	20.6067	23.6916	24.0721	23.8458		0.630674	0.550865	0.46444	0.357633	0.627586	0.530461	0.46444	0.357633	1.98012	0.611242
78.89	0.799038	75.93	0.805591	72.96	0.834819	67.41	0.807746	0.811799	24.4761	27.6199	28.3514	29.0847		0.749097	0.642205	0.547002	0.436205	0.598558	0.517355	0.456648	0.352343	1.9249	0.369353
60	0.549016	39.26	0.347236	35.1867	0.353753	16.67	0.14907	0.349769	32.182	53.4177	58.787	117.612		0.984938	1.24204	1.13422	1.76392	0.540747	0.431281	0.401232	0.262947	1.63621	0.727732
40	0.284302	35.1867	0.296321	31.85	0.311258	17.78	0.163479	0.26384	48.273	59.6015	64.9456	110.27		1.47741	1.38583	1.25304	1.6538	0.420031	0.410649	0.390019	0.270362	1.49106	0.364382
70.74	0.691167	63.33	0.648098	59.26	0.660341	46.67	0.538511	0.63453	27.296	33.1151	34.9058	42.0098		0.835401	0.769976	0.673461	0.630054	0.577402	0.49902	0.444714	0.339291	1.86043	0.374191
64.8133	0.612724	62.22	0.634224	55.5567	0.613177	40.37	0.456729	0.579213	29.792	33.7059	37.2326	48.5657		0.911792	0.783713	0.718353	0.728378	0.558677	0.497049	0.440478	0.332671	1.82887	0.229364
69.26	0.671579	65.93	0.680597	54.4433	0.598998	47.78	0.552921	0.626024	27.8793	31.8092	37.994	41.0339		0.853253	0.739612	0.733043	0.615416	0.573026	0.503377	0.439091	0.340277	1.85577	0.546158
56.2967	0.5	46.6667	0.439815	44.0733	0.46693	31.85	0.346127	0.438218	34.299	44.9395	46.9336	61.5573		1.04973	1.04491	0.90552	0.923221	0.524865	0.459568	0.422814	0.319552	1.7268	0.346189
68.89	0.666681	51.48	0.499979	39.26	0.405629	27.78	0.293293	0.466396	28.029	40.7377	52.6877	70.5759		0.857836	0.947214	1.01654	1.05848	0.571903	0.473587	0.412338	0.310445	1.76827	0.525887
92.59	0.980367	74.8167	0.791675	73.7	0.844244	70.37	0.84617	0.865614	20.8545	28.0309	28.0667	27.8613		0.638258	0.651761	0.54151	0.417857	0.625727	0.515983	0.457166	0.353578	1.95246	0.515476
62.59	0.583297	57.04	0.569476	50	0.54241	27.04	0.283687	0.494717	30.8503	36.7668	41.3704	72.5074		0.944181	0.854884	0.798186	1.08745	0.550738	0.486836	0.432944	0.308495	1.77901	0.273028
94.0733	1	91.4833	1	85.1833	0.990491	73.7	0.889399	0.969972	20.5257	22.9242	24.2831	26.6024		0.628194	0.533022	0.468511	0.398977	0.628194	0.533022	0.464055	0.354849	1.98012	0.258936
22.59	0.0538692	18.15	0.0833715	9.26	0.0235609	7.04	0.0240588	0.0462151	85.4767	115.547	223.382	278.494		2.61604	2.68664	4.30986	4.17679	0.140924	0.22399	0.101544	0.100489	0.566946	0.228941
44.0733	0.338216	35.5567	0.300946	32.96	0.325395	27.04	0.283687	0.312061	43.8115	58.9813	62.7584	72.5074		1.34086	1.37141	1.21084	1.08745	0.453501	0.412719	0.394001	0.308495	1.56872	0.324519
57.78	0.519633	54.4433	0.537019	31.11	0.301834	12.96	0.100909	0.364849	33.4184	38.5204	66.4905	151.281		1.02278	0.895658	1.28284	2.26887	0.531471	0.480986	0.387206	0.228949	1.62861	0.435524
22.22	0.048972	12.59	0.0138744	7.41	0	5.18667	0	0.0157116	86.9	166.575	279.152	378.008		2.6596	3.87312	5.38587	5.66927	0.130246	0.0537373	0	0	0.183983	0.322305
63.7033	0.598032	56.67	0.564851	40	0.415053	22.59	0.22592	0.450964	30.3111	37.0069	51.7129	86.7906		0.92768	0.860466	0.997733	1.30166	0.554783	0.486035	0.414112	0.294071	1.749	0.348922
78.15	0.789244	61.85	0.629599	51.85	0.56597	34.8133	0.384595	0.592352	24.7078	33.9075	39.8943	56.3175		0.756191	0.788401	0.769707	0.844636	0.596819	0.496376	0.435631	0.324843	1.85367	0.573648
71.11	0.696065	60.37	0.6111	36.67	0.372644	27.04	0.283687	0.490874	27.154	34.7388	56.409	72.5074		0.831055	0.807729	1.08834	1.08745	0.578468	0.493603	0.405562	0.308495	1.78613	0.451436

## Sheet: SOD
1		2		3		4		Ux	CV	CV	CV	CV		wi	wi	wi	wi	D	D	D	D	AUM	averge
47.81	0.96	47.3167	1	45.2767	0.85985	46.44	1	0.954963	8.49218	7.21	7.5745	7.30566		0.836814	0.843576	0.876624	0.859393	0.803342	0.843576	0.753765	0.859393	3.26008	0.379675
41.99	0.560914	42.92	0.664803	42.0533	0.618703	42.0867	0.649584	0.623501	9.66923	7.94858	8.15507	8.06134		0.952801	0.929991	0.943816	0.948286	0.53444	0.618261	0.583942	0.615992	2.35263	0.396731		B1	40.0081	4.06011	10.1482
39.71	0.404571	41.91	0.587802	39.3967	0.41995	40.62	0.531527	0.485963	10.2244	8.14013	8.705	8.35241		1.00751	0.952403	1.00746	0.982526	0.407609	0.559824	0.423083	0.522239	1.91275	0.647506		B2	39.9152	3.41153	8.54694
42.5667	0.600457	41.2033	0.533926	41.08	0.545885	41.1033	0.570432	0.562675	9.53824	8.27974	8.3483	8.2542		0.939893	0.968737	0.966178	0.970972	0.564365	0.517234	0.527422	0.553874	2.1629	0.768428		B3	39.6906	3.42948	8.64053
48.3933	1	46.5367	0.940534	47.15	1	45.9767	0.962705	0.97581	8.38981	7.33084	7.27355	7.37929		0.826728	0.857715	0.841794	0.868053	0.826728	0.80671	0.841794	0.835679	3.31091	0.53409		B4	39.9102	3.39275	8.50096
35.85	0.139886	35.6933	0.11385	37.1	0.24813	36.7867	0.222968	0.181208	11.3253	9.55789	9.24388	9.22277		1.11599	1.11828	1.06983	1.08491	0.156111	0.127316	0.265456	0.2419	0.790782	0.485291
37.6833	0.2656	37.3667	0.241423	38.7667	0.372818	37.24	0.259458	0.284825	10.7743	9.12988	8.84647	9.1105		1.06169	1.0682	1.02383	1.0717	0.281985	0.257889	0.381703	0.278062	1.19964	0.459405
44.6733	0.744914	44.4233	0.779416	44.5933	0.808728	44.36	0.832573	0.791408	9.08844	7.67959	7.69057	7.64822		0.89557	0.898519	0.890057	0.899689	0.667123	0.700319	0.719814	0.749057	2.83631	0.0212454
44.4267	0.728	43.2167	0.687421	42.3633	0.641895	43.3867	0.754226	0.702885	9.1389	7.89401	8.0954	7.8198		0.900542	0.923607	0.936909	0.919872	0.655595	0.634906	0.601398	0.693792	2.58569	0.409246
41.78	0.546514	40.8	0.503177	42.7667	0.67207	41.4867	0.601288	0.580762	9.71783	8.36159	8.01905	8.17793		0.95759	0.978314	0.928073	0.962001	0.523336	0.492265	0.62373	0.578439	2.21777	0.262882
35.8533	0.140114	36.1	0.144854	37.8367	0.303242	37.57	0.286021	0.218558	11.3242	9.45022	9.06391	9.03048		1.11588	1.10568	1.049	1.06229	0.156351	0.160163	0.3181	0.303837	0.938451	0.397732
37.0567	0.222629	36.7567	0.194917	37.8933	0.307481	36.9367	0.235042	0.240017	10.9565	9.28139	9.05035	9.18532		1.07965	1.08593	1.04743	1.0805	0.24036	0.211667	0.322065	0.253963	1.02806	0.364357
35.2933	0.101714	36.2633	0.157306	36.24	0.183791	37.2733	0.262141	0.176238	11.5039	9.40766	9.46325	9.10235		1.13359	1.1007	1.09522	1.07074	0.115302	0.173148	0.20129	0.280686	0.770426	0.298838
36.5567	0.188343	36.8667	0.203304	38.44	0.348379	38.7267	0.379125	0.279788	11.1063	9.2537	8.92164	8.76076		1.09441	1.08269	1.03253	1.03056	0.206125	0.220115	0.359713	0.390712	1.17666	0.79776
44.3167	0.720457	42.4567	0.629479	43.7767	0.747631	43.5767	0.76952	0.716772	9.16159	8.03532	7.83404	7.7857		0.902778	0.94014	0.906661	0.915862	0.650413	0.591798	0.677848	0.704774	2.62483	0.408054
43.41	0.658286	42.3167	0.618806	43.1767	0.702743	43.6267	0.773544	0.688345	9.35294	8.06191	7.9429	7.77678		0.921633	0.94325	0.91926	0.914812	0.606698	0.583688	0.646004	0.707648	2.54404	0.785003
39.9267	0.419429	39.2867	0.387802	40.9533	0.536409	39.93	0.475986	0.454906	10.1689	8.68368	8.37412	8.49674		1.00204	1.016	0.969167	0.999504	0.420284	0.394006	0.51987	0.47575	1.80991	0.434535
42.6133	0.603657	42.7867	0.654638	41.5467	0.580798	42.57	0.688489	0.631896	9.52779	7.97335	8.25453	7.96981		0.938863	0.932889	0.955326	0.937519	0.566752	0.610704	0.554851	0.645472	2.37778	0.93623
44.5633	0.737371	43.21	0.686912	43.7167	0.743142	43.2633	0.744298	0.727931	9.11088	7.89523	7.84479	7.84209		0.897781	0.923749	0.907905	0.922495	0.661998	0.634535	0.674703	0.686611	2.65785	0.52208
40.02	0.425829	39.61	0.412452	39.6933	0.442145	38.66	0.373759	0.413546	10.1452	8.6128	8.63994	8.77587		0.999703	1.00771	0.999931	1.03234	0.425702	0.41563	0.442114	0.385846	1.66929	0.169272
42.7833	0.615314	43.0933	0.678018	41.3167	0.563591	40.9067	0.554602	0.602881	9.48993	7.91661	8.30048	8.29388		0.935133	0.92625	0.960644	0.97564	0.575401	0.628014	0.54141	0.541092	2.28592	0.352354
35.71	0.130286	36.72	0.192122	35.37	0.118703	36.49	0.199088	0.16005	11.3697	9.29066	9.69601	9.29775		1.12036	1.08702	1.12215	1.09373	0.145967	0.20884	0.133203	0.217748	0.705758	0.287038
34.1433	0.0228571	35.4167	0.0927573	34.2533	0.0351621	35.78	0.141937	0.0731784	11.8914	9.63256	10.0121	9.48225		1.17177	1.12702	1.15874	1.11543	0.0267833	0.104539	0.0407436	0.158321	0.330387	0.611242
42.35	0.5856	42.26	0.614485	40.72	0.518953	40.8167	0.547357	0.566599	9.58704	8.07272	8.4221	8.31217		0.944701	0.944515	0.97472	0.977792	0.553217	0.580391	0.505834	0.535201	2.17464	0.369353
37.43	0.248229	37.1067	0.221601	36.3567	0.192519	37.3	0.264288	0.231659	10.8472	9.19385	9.43288	9.09584		1.06888	1.07569	1.0917	1.06998	0.265326	0.238374	0.210173	0.282782	0.996655	0.727732
40.9333	0.488457	40.8533	0.507243	39.56	0.43217	41.5767	0.608532	0.5091	9.91884	8.35068	8.66906	8.16023		0.977397	0.977037	1.0033	0.959918	0.477416	0.495595	0.433596	0.584141	1.99075	0.364382
40.9667	0.490743	41.3967	0.548666	39.5567	0.43192	41.6533	0.614704	0.521508	9.91076	8.24107	8.66979	8.14521		0.976601	0.964213	1.00339	0.958151	0.47926	0.529031	0.433383	0.588979	2.03065	0.374191
42.8333	0.618743	42.2433	0.613215	41.7167	0.593516	41.1267	0.57231	0.599446	9.47886	8.0759	8.22089	8.24951		0.934041	0.944888	0.951433	0.970421	0.577931	0.579419	0.564691	0.555382	2.27742	0.229364
33.81	0	34.4433	0.0185515	33.7833	0	34.0167	0	0.00463787	12.0086	9.90476	10.1514	9.97379		1.18332	1.15887	1.17486	1.17325	0	0.0214987	0	0	0.0214987	0.546158
38.5067	0.322057	38.9867	0.36493	38.71	0.368579	37.68	0.294875	0.33761	10.5439	8.7505	8.85942	9.00411		1.03899	1.02382	1.02533	1.05919	0.334615	0.373622	0.377915	0.312328	1.39848	0.346189
36.2	0.163886	35.7067	0.114867	35.9833	0.164589	35.3933	0.110813	0.138538	11.2158	9.55432	9.53075	9.58584		1.1052	1.11786	1.10303	1.12762	0.181126	0.128405	0.181546	0.124955	0.616032	0.525887
42.26	0.579429	42.0433	0.597967	41.49	0.576559	42.13	0.653072	0.601757	9.60745	8.11432	8.2658	8.05305		0.946713	0.949382	0.956631	0.947311	0.548553	0.567699	0.551554	0.618662	2.28647	0.515476
38.1433	0.297143	38.2133	0.305972	37.3367	0.265835	36.8833	0.230749	0.274925	10.6444	8.92759	9.18529	9.1986		1.04889	1.04454	1.06305	1.08207	0.31167	0.319599	0.282595	0.249685	1.16355	0.273028
35.2333	0.0976	36.34	0.163151	35.78	0.149377	34.51	0.0397102	0.112459	11.5235	9.38781	9.58491	9.83121		1.13552	1.09838	1.1093	1.15648	0.110827	0.179202	0.165703	0.0459242	0.501656	0.258936
33.8333	0.0016	34.2	0	34.7167	0.0698254	35.0467	0.0829085	0.0385835	12.0003	9.97523	9.87848	9.68066		1.18251	1.16711	1.14327	1.13877	0.00189201	0	0.0798295	0.094414	0.176135	0.228941
45.34	0.790629	43.83	0.73418	44.4067	0.794763	45.0333	0.886772	0.801586	8.95481	7.78355	7.72289	7.53386		0.882402	0.910682	0.893798	0.886237	0.697652	0.668605	0.710358	0.78589	2.86251	0.324519
36.6533	0.194971	38.2033	0.30521	36.8733	0.231172	38.6367	0.371881	0.275809	11.0771	8.92993	9.30071	8.78117		1.09153	1.04481	1.0764	1.03296	0.212817	0.318886	0.248835	0.384139	1.16468	0.435524
43.81	0.685714	41.46	0.553494	42.3967	0.644389	42.3867	0.673732	0.639332	9.26754	8.22849	8.08903	8.00429		0.913218	0.96274	0.936173	0.941574	0.626207	0.532871	0.603259	0.634369	2.39671	0.322305
44.2233	0.714057	42.7967	0.6554	42.6233	0.661347	43.9867	0.802522	0.708332	9.18092	7.97149	8.04602	7.71313		0.904683	0.932671	0.931194	0.907325	0.645995	0.611273	0.615842	0.728148	2.60126	0.348922
34.6867	0.0601143	36.6133	0.18399	34.9733	0.0890274	36.87	0.229675	0.140702	11.7051	9.31773	9.80599	9.20193		1.15341	1.09018	1.13488	1.08246	0.0693367	0.200582	0.101036	0.248614	0.619568	0.573648
35.99	0.149486	37.5567	0.255909	35.57	0.133666	36.4733	0.197746	0.184202	11.2812	9.08369	9.6415	9.302		1.11164	1.0628	1.11584	1.09423	0.166175	0.271979	0.14915	0.21638	0.803684	0.451436

## Sheet: Plant hight
1		2		3		4		Ux	CV	CV	CV	CV		wi	wi	wi	wi	D	D	D	D	AUM	averge
12.8333	0.233256	11.8333	0.173442	11.0667	0.180412	10.6667	0.321534	0.227161	27.7758	27.1911	27.8863	28.537		1.18302	1.31425	1.30062	1.11212	0.275947	0.227946	0.234647	0.357584	1.09612	0.379675
16.6333	0.496536	17.0333	0.596206	15.3667	0.512887	10.9667	0.348083	0.488428	21.4302	18.8901	20.083	27.7564		0.912752	0.913033	0.93667	1.0817	0.453214	0.544356	0.480406	0.37652	1.85449	0.396731		B1	15.1821	3.56456	23.4787
13.6333	0.288684	15.4667	0.468835	11.6667	0.226804	8.03333	0.0884956	0.268204	26.1459	20.8035	26.4521	37.8915		1.1136	1.00552	1.23373	1.47667	0.321478	0.471421	0.279815	0.130679	1.20339	0.647506		B2	15.552	3.21761	20.6894
10.9	0.0993072	10.5667	0.0704607	13.0667	0.335052	14.2333	0.637168	0.285497	32.7024	30.4506	23.618	21.3861		1.39285	1.4718	1.10154	0.833438	0.13832	0.103704	0.369074	0.53104	1.14214	0.768428		B3	14.3935	3.08608	21.4408
18.4333	0.621247	21.3667	0.948509	21.5667	0.992268	18.0333	0.973451	0.883869	19.3376	15.059	14.3095	16.8796		0.823622	0.727863	0.667396	0.657815	0.511673	0.690385	0.662235	0.640351	2.50464	0.53409		B4	11.8626	3.04395	25.6601
12.5333	0.212471	12.0333	0.189702	14.1333	0.417526	12.0333	0.442478	0.315544	28.4406	26.7391	21.8355	25.296		1.21134	1.29241	1.01841	0.985812	0.257374	0.245173	0.425212	0.4362	1.36396	0.485291
23.9	1	20.7667	0.899729	21.6667	1	18.3333	1	0.974932	14.9145	15.4941	14.2434	16.6034		0.635234	0.748892	0.664315	0.647051	0.635234	0.6738	0.664315	0.647051	2.6204	0.459405
10.7	0.0854503	13.3333	0.295393	12.5333	0.293814	7.73333	0.0619469	0.184151	33.3136	24.1321	24.623	39.3614		1.41889	1.1664	1.14842	1.53396	0.121244	0.344546	0.337422	0.0950239	0.898236	0.0212454
15.1667	0.394919	16.8	0.577236	14.2667	0.427835	12.2667	0.463127	0.465779	23.5026	19.1524	21.6314	24.8148		1.00102	0.925714	1.00889	0.96706	0.395321	0.534355	0.431639	0.447871	1.80919	0.409246
13.0333	0.247113	14.8333	0.417344	13.8333	0.39433	9.56667	0.224189	0.320744	27.3496	21.6918	22.309	31.8183		1.16487	1.04845	1.04049	1.23999	0.287854	0.437564	0.410298	0.277993	1.41371	0.262882
15.1667	0.394919	19.8	0.821138	15.7333	0.541237	11.6	0.40413	0.540356	23.5026	16.2506	19.6149	26.2409		1.00102	0.785455	0.914841	1.02264	0.395321	0.644967	0.495146	0.413278	1.94871	0.397732
14.7667	0.367206	18.8667	0.745257	19.1	0.801546	12.7333	0.504425	0.604609	24.1392	17.0545	16.1575	23.9054		1.02813	0.824311	0.753586	0.931618	0.377536	0.614324	0.604034	0.469931	2.06583	0.364357
21	0.799076	16.5667	0.558266	15.6667	0.536082	8.8	0.156342	0.512442	16.9741	19.4222	19.6984	34.5903		0.722957	0.938753	0.918734	1.34802	0.577698	0.524073	0.492517	0.210753	1.80504	0.298838
18.3	0.612009	15.7667	0.493225	15.3333	0.510309	11	0.351032	0.491644	19.4785	20.4077	20.1266	27.6723		0.829623	0.986385	0.938707	1.07842	0.507737	0.48651	0.479031	0.37856	1.85184	0.79776
17.0667	0.526559	15.1667	0.444444	13.8333	0.39433	12.2667	0.463127	0.457115	20.8861	21.215	22.309	24.8148		0.889576	1.02541	1.04049	0.96706	0.468414	0.455736	0.410298	0.447871	1.78232	0.408054
17.7	0.570439	17.8	0.658537	13.3333	0.35567	15.0667	0.710914	0.57389	20.1388	18.0765	23.1456	20.2032		0.857746	0.873708	1.07951	0.787341	0.489291	0.575369	0.38395	0.559732	2.00834	0.785003
20.5667	0.769053	20.8667	0.907859	17.3667	0.667526	9.4	0.20944	0.638469	17.3317	15.4199	17.7701	32.3824		0.73819	0.745304	0.8288	1.26198	0.567707	0.676631	0.553246	0.264308	2.06189	0.434535
10.1667	0.0484988	13.0333	0.271003	10.2333	0.115979	10.1	0.271386	0.176717	35.0612	24.6875	30.1571	30.1381		1.49332	1.19325	1.40653	1.17451	0.0724244	0.323373	0.163129	0.318747	0.877674	0.93623
13.6333	0.288684	13.5333	0.311653	10.4667	0.134021	8.13333	0.0973451	0.207926	26.1459	23.7754	29.4848	37.4256		1.1136	1.14916	1.37518	1.45852	0.321478	0.35814	0.184302	0.141979	1.0059	0.52208
15.7667	0.43649	16.9333	0.588076	17.9667	0.713918	13.2333	0.548673	0.571789	22.6082	19.0016	17.1767	23.0021		0.962924	0.918425	0.801122	0.896418	0.420306	0.540104	0.571935	0.49184	2.02419	0.169272
11	0.106236	12.6333	0.238482	13.1333	0.340206	13.7667	0.59587	0.320199	32.4051	25.4692	23.4981	22.111		1.38019	1.23103	1.09595	0.86169	0.146625	0.293579	0.37285	0.513455	1.32651	0.352354
19.5667	0.699769	16.5667	0.558266	15.4667	0.520619	14.6333	0.672566	0.612805	18.2175	19.4222	19.9531	20.8015		0.775917	0.938753	0.930614	0.810656	0.542962	0.524073	0.484495	0.54522	2.09675	0.287038
13.4333	0.274827	11.2667	0.127371	10.8667	0.164948	7.03333	0	0.141787	26.5352	28.5587	28.3995	43.2789		1.13018	1.38036	1.32456	1.68663	0.310604	0.175818	0.218483	0	0.704905	0.611242
9.46667	0	13.1	0.276423	11.3667	0.203608	10.8667	0.339233	0.204816	37.6538	24.5619	27.1503	28.0118		1.60374	1.18718	1.26629	1.09165	0	0.328162	0.257827	0.370324	0.956313	0.369353
18.1	0.598152	18.6	0.723577	17.8	0.701031	16.9667	0.879056	0.725454	19.6937	17.299	17.3375	17.9408		0.83879	0.836129	0.808624	0.699171	0.501724	0.605004	0.56687	0.61461	2.28821	0.727732
12.7333	0.226328	12.5333	0.230352	12.9333	0.324742	7.93333	0.079646	0.215267	27.9939	25.6724	23.8614	38.3691		1.19231	1.24085	1.1129	1.49529	0.269853	0.285833	0.361406	0.119094	1.03619	0.364382
14.4667	0.34642	13.2333	0.287263	11.6333	0.224227	8.53333	0.132743	0.247663	24.6398	24.3144	26.5279	35.6713		1.04945	1.17521	1.23726	1.39015	0.363552	0.337595	0.277428	0.184533	1.16311	0.374191
11.3667	0.13164	12.6667	0.241192	15.1667	0.497423	10.1	0.271386	0.28541	31.3598	25.4022	20.3478	30.1381		1.33567	1.22779	0.949022	1.17451	0.175827	0.296134	0.472065	0.318747	1.26277	0.229364
12.1333	0.184758	15.1667	0.444444	13.7667	0.389175	16.9333	0.876106	0.473621	29.3782	21.215	22.417	17.9761		1.25127	1.02541	1.04553	0.700547	0.231182	0.455736	0.406895	0.613754	1.70757	0.546158
22.2	0.882217	17.9	0.666667	16.4333	0.595361	12.4333	0.477876	0.65553	16.0566	17.9755	18.7794	24.4822		0.683878	0.868827	0.875872	0.954097	0.603329	0.579218	0.52146	0.45594	2.15995	0.346189
18.4667	0.623557	16.0667	0.517615	14.9333	0.479381	15.3667	0.737463	0.589504	19.3027	20.0266	20.6657	19.8088		0.822135	0.967967	0.96385	0.77197	0.512648	0.501034	0.462052	0.569299	2.04503	0.525887
17.5333	0.558891	15.8667	0.501355	19.8	0.85567	12.6333	0.495575	0.602873	20.3302	20.2791	15.5863	24.0946		0.865899	0.980168	0.726944	0.938992	0.483944	0.491412	0.622025	0.465341	2.06272	0.515476
15.9333	0.448037	18.0667	0.680217	16.6667	0.613402	13.1333	0.539823	0.57037	22.3717	17.8096	18.5165	23.1773		0.952851	0.860812	0.86361	0.903244	0.426913	0.585539	0.52974	0.487592	2.02978	0.273028
16.6	0.494226	13.9333	0.344173	11.7333	0.231959	8.83333	0.159292	0.307413	21.4733	23.0929	26.3018	34.4598		0.914584	1.11617	1.22672	1.34294	0.452012	0.384157	0.284548	0.213919	1.33464	0.258936
11.3	0.127021	9.7	0	9.7	0.0747423	9.2	0.19174	0.0983759	31.5448	33.1712	31.8153	33.0864		1.34355	1.6033	1.48387	1.28941	0.170659	0	0.110908	0.247233	0.528799	0.228941
18.4	0.618938	22	1	17.6	0.685567	14	0.616519	0.730256	19.3726	14.6255	17.5345	21.7425		0.825114	0.706909	0.817813	0.847329	0.510694	0.706909	0.560665	0.522394	2.30066	0.324519
10.9667	0.103926	9.7	0	8.73333	0	11.2333	0.371681	0.118902	32.5036	33.1712	35.3368	27.0975		1.38439	1.6033	1.64811	1.05602	0.143874	0	0	0.392502	0.536376	0.435524
16.9667	0.51963	17.9333	0.669377	13.0333	0.332474	13.1	0.536873	0.514589	21.0092	17.9421	23.6784	23.2363		0.894819	0.867212	1.10436	0.905542	0.464975	0.580491	0.367171	0.486161	1.8988	0.322305
9.76667	0.0207852	12.1667	0.200542	13.2333	0.347938	8.63333	0.141593	0.177715	36.4972	26.4461	23.3205	35.2581		1.55448	1.27825	1.08767	1.37405	0.0323102	0.256342	0.378442	0.194555	0.861649	0.348922
15.4667	0.415704	18.5	0.715447	11.3667	0.203608	9.13333	0.185841	0.38015	23.0467	17.3925	27.1503	33.3279		0.981601	0.840649	1.26629	1.29882	0.408056	0.60144	0.257827	0.241375	1.5087	0.573648
14.4667	0.34642	17.6	0.642276	16.4333	0.595361	17.4667	0.923304	0.62684	24.6398	18.2819	18.7794	17.4272		1.04945	0.883636	0.875872	0.679156	0.363552	0.567539	0.52146	0.627068	2.07962	0.451436

## Sheet: Germ length
1		2		3		4		Ux	CV	CV	CV	CV		wi	wi	wi	wi	D	D	D	D	AUM	averge
60.5333	0.45109	55.7167	0.581764	48.3167	0.613313	34.95	0.507206	0.538343	22.1141	21.0094	26.4258	29.6966		1.21818	0.962208	0.91581	0.972112	0.549507	0.559778	0.561679	0.493061	2.16402	0.379675
73.15	0.667104	61.6267	0.716932	49.1133	0.626694	46.7	0.729058	0.684947	18.3	18.9946	25.9972	22.2247		1.00807	0.869932	0.900955	0.727522	0.672488	0.623682	0.564623	0.530406	2.3912	0.396731		B1	73.7403	13.3864	18.1535
74.3233	0.687193	65.25	0.799802	65.0367	0.894133	48.9733	0.771981	0.788277	18.0111	17.9398	19.6321	21.1931		0.992155	0.821625	0.680369	0.693751	0.681803	0.657137	0.60834	0.535562	2.48284	0.647506		B2	53.611	11.7057	21.8345
71.6133	0.640794	65.0967	0.796295	56.1333	0.744597	53.75	0.862169	0.760964	18.6926	17.982	22.746	19.3097		1.0297	0.82356	0.788282	0.632099	0.659826	0.655796	0.586953	0.544976	2.44755	0.768428		B3	44.2489	12.7681	28.8551
69.1333	0.598334	42.3733	0.276588	30.2433	0.309764	20.64	0.237019	0.355426	19.3632	27.6252	42.2178	50.2856		1.06664	1.26521	1.4631	1.64609	0.638206	0.34994	0.453214	0.390155	1.83152	0.53409		B4	33.9753	10.3789	30.5485
67.9867	0.578701	43.3667	0.299306	41.63	0.501008	35.1	0.510038	0.472263	19.6898	26.9924	30.6704	29.5697		1.08463	1.23623	1.06291	0.967957	0.627676	0.37001	0.532526	0.493695	2.02391	0.485291
89.9367	0.954514	70.8767	0.92849	66.59	0.920222	54.3567	0.873623	0.919212	14.8843	16.5156	19.1742	19.0942		0.819914	0.756398	0.664498	0.625044	0.782619	0.702308	0.611485	0.546053	2.64247	0.459405
39.0833	0.0838375	35.7667	0.125486	11.8	0	8.08667	0	0.0523309	34.251	32.728	108.204	128.346		1.88675	1.49891	3.74991	4.2014	0.15818	0.188092	0	0	0.346272	0.0212454
87.41	0.911254	72.5967	0.967828	63.6767	0.871291	34.7633	0.503682	0.813514	15.3145	16.1243	20.0514	29.856		0.843614	0.738477	0.6949	0.977331	0.768747	0.714719	0.60546	0.492264	2.58119	0.409246
87.28	0.909029	68.0967	0.864908	37.0267	0.423693	24.0833	0.302033	0.624916	15.3373	17.1898	34.4834	43.096		0.844871	0.787278	1.19505	1.41074	0.768012	0.680923	0.506336	0.42609	2.38136	0.262882
73.6333	0.67538	62.7467	0.742548	51.67	0.669634	37.6	0.557241	0.661201	18.1798	18.6555	24.7108	27.6036		1.00145	0.854404	0.856375	0.903598	0.676361	0.634436	0.573458	0.503522	2.38778	0.397732
73.53	0.67361	60.4633	0.690326	58.21	0.779476	31.7567	0.446913	0.647581	18.2054	19.36	21.9345	32.6827		1.00286	0.88667	0.76016	1.06986	0.675537	0.612091	0.592526	0.478136	2.35829	0.364357
34.1867	0	30.28	0	28.99	0.288713	23.1133	0.283718	0.143108	39.1568	38.6582	44.043	44.9046		2.15699	1.77051	1.52635	1.46994	0	0	0.440678	0.41705	0.857728	0.298838
78.56	0.759731	52.8467	0.516124	50.0133	0.641809	36.2833	0.532381	0.612511	17.0397	22.1503	25.5293	28.6053		0.938649	1.01446	0.884742	0.936389	0.713121	0.523589	0.567836	0.498515	2.30306	0.79776
77.8533	0.747632	41.5067	0.256766	40.37	0.479845	36.8567	0.543206	0.506862	17.1944	28.202	31.6276	28.1603		0.947169	1.29162	1.09608	0.921822	0.708134	0.331645	0.525951	0.500739	2.06647	0.408054
82.5367	0.827816	74.0033	1	45.77	0.570541	37.13	0.548367	0.736681	16.2188	15.8178	27.8962	27.953		0.893425	0.72444	0.966766	0.915036	0.739592	0.72444	0.55158	0.501776	2.51739	0.785003
87.5	0.912795	70.74	0.925364	69.51	0.969264	55.6233	0.897539	0.926241	15.2988	16.5475	18.3687	18.6593		0.842746	0.75786	0.636583	0.61081	0.769255	0.701296	0.617017	0.548226	2.63579	0.434535
74.0033	0.681714	52.6533	0.511702	49.5433	0.633916	26.2267	0.342501	0.542458	18.0889	22.2317	25.7715	39.574		0.996446	1.01819	0.893135	1.29545	0.679291	0.521009	0.566172	0.443693	2.21017	0.93623
90.9167	0.971293	43.3267	0.298391	39.03	0.45734	29.4433	0.403235	0.532565	14.7238	27.0173	32.7135	35.2506		0.811076	1.23737	1.13372	1.15392	0.787792	0.36922	0.518493	0.465302	2.14081	0.52208
40.5067	0.108207	36.1233	0.133643	29.3	0.29392	28.33	0.382214	0.229496	33.0474	32.4048	43.577	36.6359		1.82045	1.48411	1.5102	1.19927	0.196985	0.198341	0.443878	0.458378	1.29758	0.169272
84.38	0.859377	73.0067	0.977205	71.34	1	61.05	1	0.959145	15.8644	16.0338	17.8975	17.0007		0.873907	0.73433	0.620254	0.556516	0.751016	0.717591	0.620254	0.556516	2.64538	0.352354
76.2633	0.720409	61.73	0.719296	47.5767	0.600885	30.7833	0.428535	0.617281	17.5529	18.9628	26.8368	33.7161		0.966917	0.868476	0.930055	1.10369	0.696575	0.624691	0.558855	0.472971	2.35309	0.287038
91.2433	0.976886	47.55	0.394984	41.9567	0.506494	31.4833	0.441752	0.580029	14.6711	24.6177	30.4316	32.9665		0.808172	1.12747	1.05463	1.07915	0.789492	0.445331	0.534166	0.476718	2.24571	0.611242
77.54	0.742267	44.8	0.332088	33.36	0.36211	30.74	0.427717	0.466045	17.2639	26.1288	38.2736	33.7637		0.950997	1.19667	1.32641	1.10525	0.705893	0.397401	0.480304	0.472733	2.05633	0.369353
65.6133	0.538066	49.8533	0.447663	46.38	0.580786	39.1467	0.586443	0.53824	20.402	23.4803	27.5293	26.513		1.12386	1.07537	0.954051	0.867898	0.604712	0.481406	0.5541	0.508973	2.14919	0.727732
68.2633	0.583438	59.9933	0.679576	55.3067	0.730713	40.2233	0.606772	0.650125	19.61	19.5117	23.086	25.8033		1.08023	0.893616	0.800064	0.844666	0.630249	0.60728	0.584618	0.51252	2.33467	0.364382
73.1367	0.666876	48.1	0.407563	41.3333	0.496025	39.0267	0.584178	0.53866	18.3033	24.3362	30.8905	26.5945		1.00825	1.11457	1.07054	0.870566	0.67238	0.454259	0.531014	0.508565	2.16622	0.374191
81.78	0.814861	55.0833	0.567279	45.6967	0.569309	29.5033	0.404368	0.588954	16.3688	21.2509	27.9409	35.1789		0.901691	0.973271	0.968318	1.15157	0.734753	0.552116	0.551272	0.46566	2.3038	0.229364
65.7667	0.540692	54.17	0.54639	42.1733	0.510133	36.4167	0.534898	0.533028	20.3544	21.6092	30.2752	28.5005		1.12124	0.989681	1.04922	0.93296	0.606246	0.540752	0.53524	0.499039	2.18128	0.546158
74.84	0.696039	53.5533	0.532286	46.53	0.583305	35.7433	0.522185	0.583454	17.8867	21.858	27.4405	29.0374		0.985306	1.00108	0.950976	0.950535	0.685812	0.53286	0.554709	0.496355	2.26974	0.346189
77.3633	0.739242	65.7	0.810094	57.74	0.771582	35.2133	0.512178	0.708274	17.3033	17.8169	22.113	29.4745		0.953169	0.815997	0.766347	0.964842	0.704622	0.661034	0.5913	0.494171	2.45113	0.525887
68.9867	0.595822	56.1	0.590531	45.5833	0.567406	35.1633	0.511234	0.566248	19.4044	20.8658	28.0104	29.5164		1.06891	0.955633	0.970725	0.966214	0.636878	0.564331	0.550795	0.493962	2.24597	0.515476
79.7567	0.780219	36.5067	0.142411	29.5767	0.298567	28.5033	0.385487	0.401671	16.7841	32.0646	43.1694	36.4131		0.924566	1.46853	1.49607	1.19198	0.721364	0.209134	0.446678	0.459491	1.83667	0.273028
91.1833	0.975859	37.0067	0.153846	27.38	0.261673	24.4867	0.309648	0.425257	14.6808	31.6314	46.6328	42.3861		0.808704	1.44868	1.6161	1.3875	0.789181	0.222875	0.42289	0.429637	1.86458	0.258936
92.5933	1	41.67	0.260502	38.5467	0.449222	25.0333	0.31997	0.507423	14.4572	28.0915	33.1237	41.4605		0.796389	1.28656	1.14793	1.3572	0.796389	0.335151	0.515675	0.434264	2.08148	0.228941
61.2367	0.463132	42.7567	0.285355	37.26	0.427612	24.2867	0.305872	0.370493	21.8601	27.3775	34.2675	42.7352		1.20419	1.25386	1.18757	1.39893	0.557697	0.357796	0.507819	0.427893	1.8512	0.324519
63.09	0.494864	51.7467	0.490966	36.48	0.414511	30.99	0.432438	0.458195	21.218	22.6212	35.0002	33.4913		1.16881	1.03603	1.21296	1.09633	0.578402	0.508654	0.502787	0.474095	2.06394	0.435524
82.7233	0.831012	55.8533	0.58489	35.2233	0.393405	24.0933	0.302222	0.527882	16.1822	20.9579	36.2489	43.0781		0.891409	0.959853	1.25624	1.41015	0.740772	0.561408	0.49421	0.426179	2.22257	0.322305
73.73	0.677035	41.77	0.262789	25.47	0.229594	23.72	0.295173	0.366147	18.156	28.0242	50.1298	43.7561		1.00014	1.28348	1.73729	1.43235	0.677129	0.337284	0.398872	0.42279	1.83608	0.348922
62.48	0.48442	53.69	0.535412	41.9467	0.506326	38.3967	0.572283	0.52461	21.4251	21.8024	30.4388	27.0309		1.18022	0.998529	1.05488	0.88485	0.571723	0.534624	0.534116	0.506384	2.14685	0.573648
77.7067	0.74512	61.9533	0.724403	35.37	0.395868	25.2167	0.323431	0.547206	17.2269	18.8944	36.0986	41.1591		0.948957	0.865345	1.25103	1.34734	0.707087	0.626859	0.495243	0.43577	2.26496	0.451436

## Sheet: Chloroplyll SPAD
1		2		3		4		Ux	CV	CV	CV	CV		wi	wi	wi	wi	D	D	D	D	AUM	averge
39.7	0.631451	39.27	0.449583	28.1233	0	41.98	0.586863	0.416974	9.99665	8.58029	15.8182	10.068		0.983592	1.01595	1.38711	0.932782	0.62109	0.456753	0	0.547415	1.62526	0.379675
43.6533	0.837533	47.84	1	44.36	0.850978	43.0167	0.640622	0.832283	9.09133	7.04323	10.0284	9.82533		0.894516	0.833953	0.879398	0.910303	0.749186	0.833953	0.748349	0.58316	2.91465	0.396731		B1	39.0486	3.96867	10.1634
31.0333	0.17967	42.2133	0.638621	29.96	0.0962614	40.3033	0.499914	0.353617	12.7884	7.98203	14.8485	10.4868		1.25828	0.945111	1.30207	0.971587	0.226075	0.603568	0.125339	0.48571	1.44069	0.647506		B2	39.8963	3.36948	8.4456
39.1	0.600174	37.9933	0.367587	40.24	0.635045	38.4667	0.404667	0.501868	10.1501	8.86861	11.0552	10.9875		0.998685	1.05009	0.969436	1.01798	0.599385	0.385999	0.615636	0.411942	2.01296	0.768428		B3	39.0101	4.44861	11.4037
36.9267	0.486881	32.9733	0.0451723	37.33	0.48253	41.2467	0.548833	0.390854	10.7474	10.2188	11.917	10.247		1.05746	1.20996	1.04501	0.949366	0.514859	0.0546566	0.504247	0.521044	1.59481	0.53409		B4	39.1582	4.22653	10.7935
40.74	0.685665	45.26	0.834297	42.48	0.752446	47.0033	0.847364	0.779943	9.74146	7.44472	10.4722	8.99198		0.958483	0.881491	0.918317	0.833094	0.657198	0.735425	0.690984	0.705934	2.78954	0.485291
35.45	0.409904	39.74	0.479769	39.9033	0.6174	37.86	0.373207	0.47007	11.1951	8.47881	11.1485	11.1636		1.10151	1.00393	0.977615	1.03429	0.451515	0.481656	0.60358	0.386004	1.92275	0.459405
43.1867	0.813206	39.9033	0.490259	40.5433	0.650943	41.01	0.53656	0.622742	9.18957	8.44411	10.9725	10.3061		0.904182	0.999824	0.962183	0.954845	0.735286	0.490173	0.626327	0.512332	2.36412	0.0212454
36.2533	0.451781	34.28	0.129094	36.69	0.448987	38.2667	0.394296	0.356039	10.947	9.82929	12.1249	11.0449		1.0771	1.16384	1.06324	1.0233	0.486615	0.150245	0.477378	0.403482	1.51772	0.409246
43.1867	0.813206	37.83	0.357097	39.8033	0.612159	37.36	0.347277	0.532435	9.18957	8.9069	11.1765	11.313		0.904182	1.05462	0.980071	1.04813	0.735286	0.376602	0.59996	0.363992	2.07584	0.262882
40.2733	0.661338	43.52	0.722543	28.8567	0.0384347	46.1	0.800519	0.555709	9.85434	7.74237	15.4162	9.16818		0.969589	0.916735	1.35186	0.849419	0.641226	0.662381	0.0519582	0.679975	2.03554	0.397732
38.6333	0.575847	39.9033	0.490259	41.0067	0.675227	49.9467	1	0.685333	10.2727	8.44411	10.8485	8.46209		1.01075	0.999824	0.951311	0.784	0.582037	0.490173	0.642351	0.784	2.49856	0.364357
44.39	0.875934	37.19	0.315992	39.9733	0.621069	38.1333	0.387381	0.550094	8.94046	9.06018	11.1289	11.0836		0.879671	1.07277	0.975903	1.02688	0.770534	0.338987	0.606103	0.397792	2.11342	0.298838
40.9733	0.697828	36.3867	0.264397	37.66	0.499825	34.2167	0.18427	0.41158	9.68598	9.26021	11.8126	12.3523		0.953025	1.09645	1.03585	1.14442	0.665047	0.289899	0.517744	0.210882	1.68357	0.79776
39.1333	0.601911	39.9033	0.490259	44.8933	0.878931	39.8033	0.473984	0.611271	10.1414	8.44411	9.90929	10.6185		0.997835	0.999824	0.868951	0.983792	0.600608	0.490173	0.763748	0.466302	2.32083	0.408054
36.2533	0.451781	40.64	0.537572	39.57	0.59993	40.0033	0.484356	0.51841	10.947	8.29104	11.2424	10.5654		1.0771	0.9817	0.98585	0.978873	0.486615	0.527735	0.591441	0.474123	2.07991	0.785003
44.2567	0.868983	40.24	0.511882	38.5633	0.54717	30.6633	0	0.482009	8.96739	8.37346	11.5359	13.7837		0.882321	0.991459	1.01159	1.27704	0.766723	0.50751	0.553509	0	1.82774	0.434535
41.41	0.720591	44.96	0.815029	42.9833	0.778826	41.0433	0.538289	0.713184	9.58384	7.4944	10.3496	10.2977		0.942975	0.887373	0.907563	0.95407	0.679499	0.723235	0.706834	0.513565	2.62313	0.93623
38.7667	0.582798	39.0333	0.434382	37.6267	0.498078	38.1967	0.390666	0.476481	10.2373	8.63231	11.823	11.0652		1.00727	1.02211	1.03677	1.02517	0.587036	0.443986	0.516391	0.4005	1.94791	0.52208
36.7567	0.478019	35.8867	0.232284	37.83	0.508735	39.2	0.442697	0.415434	10.7971	9.38923	11.7595	10.782		1.06235	1.11173	1.03119	0.998934	0.507826	0.258238	0.524605	0.442225	1.73289	0.169272
40.17	0.655951	45.73	0.864483	47.2033	1	36.5267	0.304062	0.706124	9.87969	7.3682	9.42436	11.5711		0.972084	0.872432	0.826427	1.07204	0.63764	0.754202	0.826427	0.325968	2.54424	0.352354
42.95	0.800869	42.35	0.647399	39.2	0.580538	39.7	0.468626	0.624358	9.24021	7.95627	11.3485	10.6462		0.909164	0.942061	0.995156	0.986353	0.728121	0.609889	0.577726	0.46223	2.37797	0.287038
39.1	0.600174	40.4033	0.522372	36.0867	0.417365	39.9033	0.47917	0.50477	10.1501	8.33961	12.3276	10.5919		0.998685	0.987451	1.08101	0.981327	0.599385	0.515817	0.451177	0.470223	2.0366	0.611242
40.24	0.6596	37.76	0.352601	36.0567	0.415793	33.4767	0.145895	0.393472	9.8625	8.92341	12.3378	12.6253		0.970393	1.05658	1.08191	1.16972	0.640071	0.37255	0.449851	0.170655	1.63313	0.369353
40.8767	0.692789	40.91	0.554913	42.2467	0.740217	42.6167	0.619879	0.651949	9.70889	8.23632	10.5301	9.91755		0.955278	0.975221	0.923389	0.918847	0.661806	0.541163	0.683508	0.569574	2.45605	0.727732
38.2333	0.554996	41.48	0.591522	35.08	0.364605	33.71	0.157995	0.417279	10.3801	8.12314	12.6813	12.5379		1.02132	0.96182	1.11203	1.16162	0.56683	0.568938	0.405453	0.18353	1.72475	0.364382
33.31	0.298349	39	0.432241	42.95	0.777079	42.08	0.592048	0.52493	11.9144	8.63969	10.3576	10.044		1.17228	1.02298	0.908268	0.930566	0.349748	0.442175	0.705796	0.55094	2.04866	0.374191
35.9533	0.436142	39.2	0.445087	37.0567	0.468204	30.73	0.00345722	0.338223	11.0384	8.59561	12.0049	13.7538		1.08609	1.01776	1.05271	1.27427	0.473691	0.452993	0.492885	0.00440541	1.42397	0.229364
33.7767	0.322676	38.6333	0.408692	40.64	0.65601	40.0033	0.484356	0.467933	11.7497	8.72169	10.9464	10.5654		1.15608	1.03269	0.959894	0.978873	0.37304	0.422053	0.6297	0.474123	1.89892	0.546158
45.8967	0.954474	43.4567	0.718476	37.36	0.484102	41.61	0.567675	0.681182	8.64697	7.75365	11.9074	10.1575		0.850794	0.918071	1.04417	0.941077	0.812061	0.659612	0.505484	0.534226	2.51138	0.346189
33.5133	0.308949	38.6	0.406551	45.2933	0.899895	43.1533	0.64771	0.565776	11.8421	8.72922	9.82178	9.79421		1.16517	1.03358	0.861277	0.90742	0.359977	0.420204	0.775059	0.587745	2.14298	0.525887
38.3967	0.56351	42.08	0.630058	43.89	0.826345	40.6767	0.519274	0.634797	10.336	8.00732	10.1358	10.3906		1.01698	0.948106	0.888815	0.96267	0.573078	0.597362	0.734468	0.499889	2.4048	0.515476
46.77	1	42.55	0.660244	40.27	0.636618	40.9733	0.534659	0.70788	8.4855	7.91887	11.047	10.3153		0.834907	0.937633	0.968714	0.9557	0.834907	0.619067	0.6167	0.510973	2.58165	0.273028
36.86	0.483406	39.57	0.46885	34.85	0.352551	37.6633	0.363008	0.416954	10.7669	8.51524	12.765	11.2219		1.05938	1.00825	1.11937	1.03969	0.512108	0.472717	0.394635	0.377416	1.75688	0.258936
40.6767	0.682363	36.96	0.30122	33.3433	0.273585	38.2633	0.394123	0.412823	9.75663	9.11656	13.3418	11.0459		0.959975	1.07945	1.16995	1.02339	0.655052	0.325151	0.320081	0.40334	1.70362	0.228941
41.41	0.720591	43.82	0.741811	36.79	0.454228	40.2733	0.498358	0.603747	9.58384	7.68937	12.0919	10.4946		0.942975	0.910459	1.06035	0.972311	0.679499	0.675388	0.481638	0.484559	2.32108	0.324519
35.6833	0.422068	38.8667	0.423678	40.0033	0.622642	42.6167	0.619879	0.522067	11.1219	8.66933	11.1206	9.91755		1.09431	1.02649	0.975171	0.918847	0.461873	0.434902	0.607182	0.569574	2.07353	0.435524
27.5867	0	32.27	0	32.1033	0.208595	31.3667	0.0364736	0.0612673	14.3862	10.4415	13.8572	13.4746		1.41549	1.23633	1.21514	1.2484	0	0	0.253473	0.0455338	0.299007	0.322305
37.73	0.528758	40.4433	0.524941	45.36	0.903389	40.04	0.486258	0.610836	10.5186	8.33136	9.80734	10.5558		1.03495	0.986474	0.860011	0.977977	0.547237	0.517841	0.776925	0.475549	2.31755	0.348922
39.8367	0.638575	41.3467	0.582959	42.08	0.731481	31.9367	0.0660328	0.504762	9.96235	8.14934	10.5718	13.2341		0.980218	0.964922	0.927046	1.22612	0.625943	0.56251	0.678117	0.0809642	1.94753	0.573648
41.9467	0.748566	35.3533	0.19803	43.1533	0.787736	34.3467	0.191011	0.481336	9.46123	9.53087	10.3088	12.3055		0.930911	1.1285	0.903988	1.14009	0.696849	0.223478	0.712104	0.217769	1.8502	0.451436

[truncated: 2 more sheets: PRO, Total affiliation function valu]
